# Supplementary material for: NBS-promoted regioselective thiocyanatothiolation of alkenes with free thiols and NH 4 SCN
Source: Royal Society of Chemistry journal article supplement (doi:10.1039/d4ob02020k), 2025-01-01
Supplement: d4ob02020k1.pdf [file d4ob02020k1.pdf]

## Supporting Information

# NBS-Promoted Regioselective Thiocyanatothiolation of Alkenes with Free-thiols and NH<sub>4</sub>SCN

Wei Chen\*, Run Wu, Wanxiang Wang, Haiping Zhou and Mingyue Fu

*Sichuan Engineering Research Center for Biomimetic Synthesis of Natural Drugs, School of Life  
Science and Engineering, Southwest Jiaotong University, Chengdu, 610031, China*

\*Corresponding Author, email: chenweicstq@163.com

### Contents

|                                                       |    |
|-------------------------------------------------------|----|
| <b>1. General methods</b> .....                       | 1  |
| <b>2. Optimization of reaction conditions</b> .....   | 1  |
| <b>3. Mechanistic investigation</b> .....             | 4  |
| <b>4. Characterization data of the products</b> ..... | 6  |
| <b>5. NMR Spectra of Products</b> .....               | 20 |

### 1. General methods

Unless otherwise noted, materials were obtained from commercial suppliers and used without further purified. Reactions were monitored by thin layer chromatography (TLC). Yields refer to products isolated after purified by column chromatography. <sup>1</sup>H NMR, <sup>13</sup>C NMR and <sup>19</sup>F NMR spectra were recorded on a Bruker AV 400 MHz spectrometer using CDCl<sub>3</sub> or DMSO-*d*<sub>6</sub> as the solvent with TMS as the internal standard. Chemical shifts are reported in parts per million. Multiplicity was indicated as follows: s, singlet; d, doublet; t, triplet; q, quartet; m, multiplet. Coupling constants (*J*) were reported in Hz.

### 2. Optimization of reaction conditions

**Table S1** Optimization of solvents<sup>a</sup>

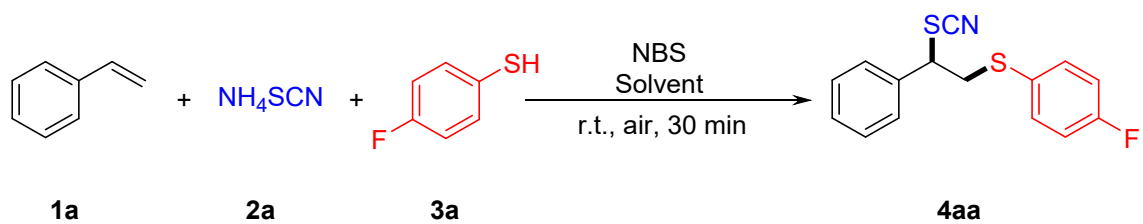

| Entry | Solvent                           | Yield <sup>b</sup> (%) |
|-------|-----------------------------------|------------------------|
| 1     | MeCN                              | 86                     |
| 2     | MeOH                              | 23                     |
| 3     | THF                               | 19                     |
| 4     | DCE                               | 14                     |
| 5     | DCM                               | 20                     |
| 6     | 1,4-Dioxane                       | n.d.                   |
| 7     | EtOH                              | 31                     |
| 8     | HFIP                              | 34                     |
| 9     | H <sub>2</sub> O                  | 24                     |
| 10    | toluene                           | 26                     |
| 11    | DMF                               | trace                  |
| 12    | MeCN/H <sub>2</sub> O (4:1, v/v)  | 42                     |
| 13    | MeCN/H <sub>2</sub> O (20:1, v/v) | 64                     |

<sup>a</sup>Reaction conditions: **1a** (0.2 mmol, 1.0 equiv.), **2a** (0.24 mmol, 1.2 equiv.), **3a** (0.4 mmol, 2.0 equiv.), NBS (0.4 mmol, 2.0 equiv.), solvent (4.0 mL), under air, room temperature.

**Table S2** Screening the amount of NBS

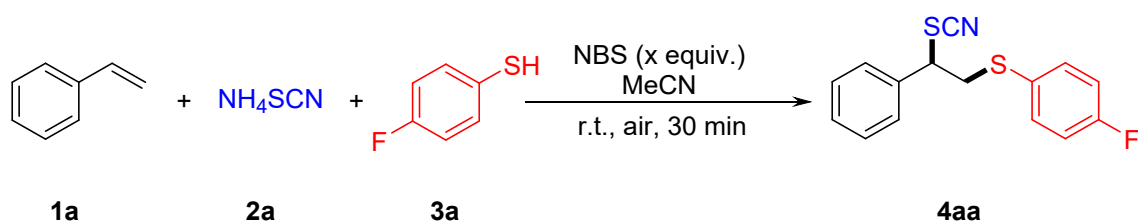

| Entry | Oxidant | Equiv. | Yield <sup>b</sup> (%) |
|-------|---------|--------|------------------------|
| 1     | NBS     | 2      | 86                     |
| 2     | NBS     | 0.5    | trace                  |
| 3     | NBS     | 1      | 19                     |
| 4     | NBS     | 1.5    | 57                     |
| 5     | NBS     | 4      | 32                     |
| 6     | NBS     | 6      | 38                     |
| 7     | NCS     | 2      | n.d.                   |
| 8     | NIS     | 2      | n.d.                   |
| 9     | -       | -      | n.d.                   |

<sup>a</sup>Reaction conditions: **1a** (0.2 mmol, 1.0 equiv.), **2a** (0.24 mmol, 1.2 equiv.), **3a** (0.4 mmol, 2.0 equiv.), NBS, MeCN (4.0 mL), under air, room temperature.

**Table S3** Screening of the amount ratio

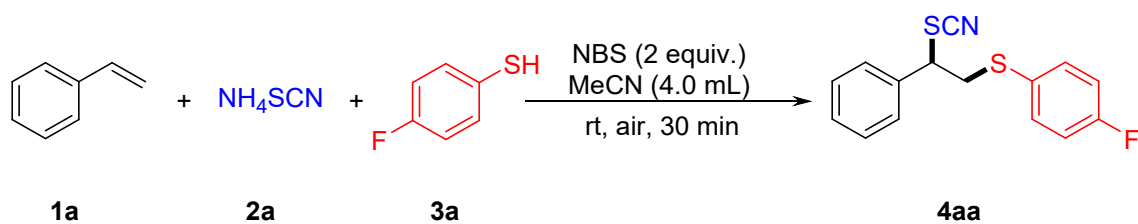

| Entry | Ratio     | Yield <sup>b</sup> (%) |
|-------|-----------|------------------------|
| 1     | 1:1.2:2   | 86                     |
| 2     | 1:1.2:1   | 68                     |
| 3     | 1:1.2:1.5 | 65                     |
| 2     | 1:1.2:3   | 45                     |
| 3     | 1:1:2     | 72                     |
| 4     | 1:1.5:2   | 74                     |

|   |           |    |
|---|-----------|----|
| 5 | 1:2:2     | 71 |
| 6 | 1.5:1.2:1 | 63 |
| 7 | 2:1.2:1   | 67 |
| 8 | 2:1:2     | 64 |

<sup>a</sup>Reaction conditions: **1a**, **2a**, **3a**, NBS (0.4 mmol, 2.0 equiv.), NBS (0.4 mmol, 2.0 equiv.), MeCN (4.0 mL), under air, room temperature.

**Table S4** Reaction time screening

| <b>1a</b> | <b>2a</b>  | <b>3a</b>              | <b>4aa</b> |
|-----------|------------|------------------------|------------|
| Entry     | Time (min) | Yield <sup>b</sup> (%) |            |
| 1         | 15         | 75                     |            |
| 2         | 5          | 52                     |            |
| 3         | 30         | 86                     |            |
| 4         | 60         | 83                     |            |
| 5         | 240        | 82                     |            |

<sup>a</sup>Reaction conditions: **1a** (0.2 mmol, 1.0 equiv.), **2a** (0.24 mmol, 1.2 equiv.), **3a** (0.4 mmol, 1.0 equiv.), NBS (0.4 mmol, 2.0 equiv.), MeCN (4.0 mL), under air, room temperature, Time.

**Table S5** Reaction temperature screening

| <b>1a</b> | <b>2a</b>        | <b>3a</b>              | <b>4aa</b> |
|-----------|------------------|------------------------|------------|
| Entry     | Temperature (°C) | Yield <sup>b</sup> (%) |            |
| 1         | rt               | 86                     |            |
| 2         | 40               | 70                     |            |
| 3         | 60               | 56                     |            |
| 4         | 80               | 44                     |            |

<sup>a</sup>Reaction conditions: **1a** (0.2 mmol, 1.0 equiv.), **2a** (0.24 mmol, 1.2 equiv.), **3a** (0.4 mmol, 2.0 equiv.), NBS (0.4 mmol, 2.0 equiv.), MeCN (4.0 mL), under air, temperature, 30 min.

**Table S6** Atmosphere screening

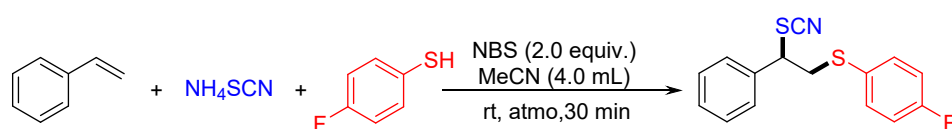

| Entry | Atmosphere     | Yield <sup>b</sup> (%) |
|-------|----------------|------------------------|
| 1     | Air            | 86                     |
| 2     | N <sub>2</sub> | 68                     |

<sup>a</sup>Reaction conditions: **1a** (0.2 mmol, 1.0 equiv.), **2a** (0.24 mmol, 1.2 equiv.), **3a** (0.4 mmol, 1.0 equiv.), NBS (0.4 mmol, 2.0 equiv.), MeCN (4.0 mL), under air, room temperature.

### 3. Mechanistic investigation

#### Radical trapping experiment

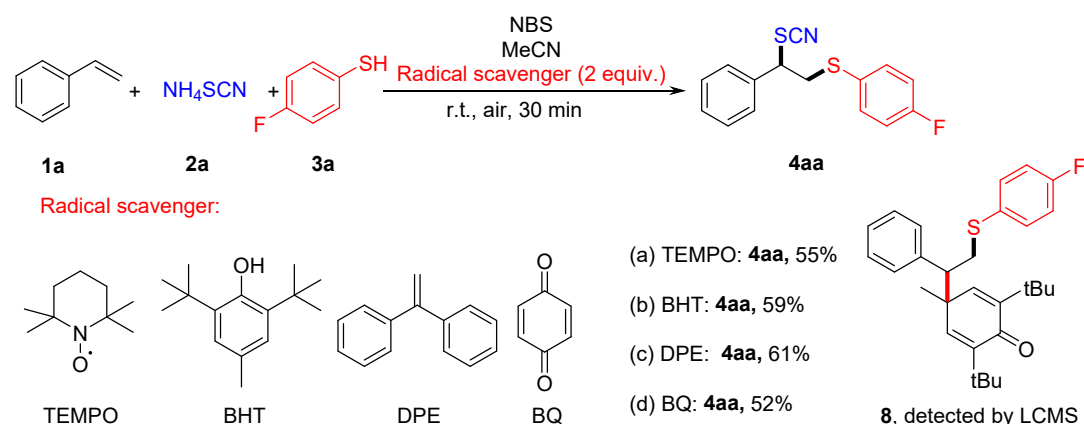

In order to confirm whether the reaction undergoes a radical mechanism, commonly used radical scavengers such as 2,2,6,6-tetramethylpiperidinoxy (TEMPO), 1,1-diphenylethylene (DPE), butylated hydroxytoluene (BHT) and 1,4-Benzoquinone (BQ) was used respectively in radical capture and suppression experiments. Under the standard conditions, the radical scavenger (2.0 equiv. to **1a**) was added to the model reaction system at the beginning of the reaction. Additionally, after 30 min, a small amount of the reaction mixture added with TEMPO was used to measurement. The radical trapping product **9** can be observed by LC-MS.

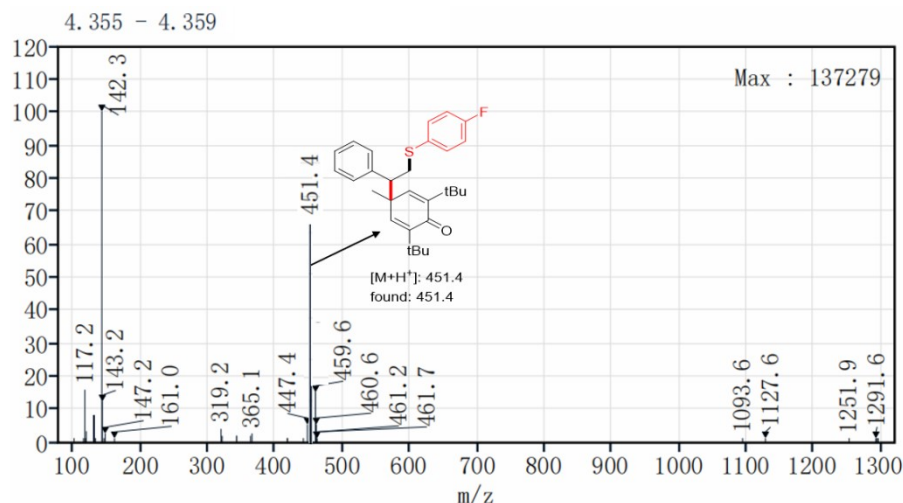

**Figure S1.** Mass spectrometry (LCMS) data of possible intermediate (with BHT).

### Control experiments

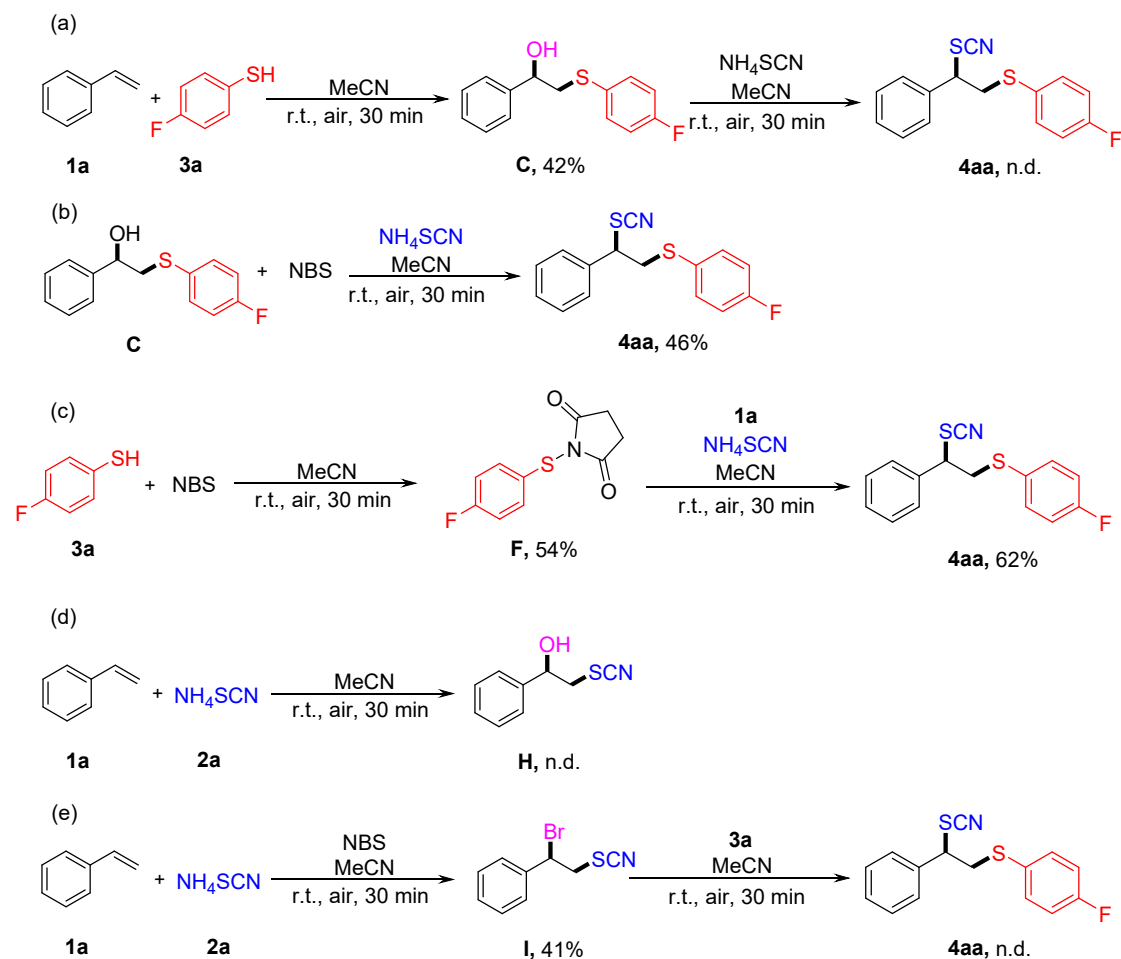

In an oven-dried round bottom flask (25.0 mL) equipped with a stir bar, styrene **1a** (0.2 mmol, 1.0 equiv.), **3a** (0.4 mmol, 2.0 equiv.), MeCN (4.0 mL). The reaction mixture was stirred under room temperature for 15 min. After reaction completion, the solvents were removed in vacuum,

the products **C** were obtained by silica gel column chromatography, then **C** (0.2 mmol, 1.0 equiv.), **2a** (0.24 mmol, 1.2 equiv.), MeCN(4.0 mL). The reaction mixture was stirred under room temperature for 15 min. After reaction completion, the solvents were removed in vacuum, the products **4aa** were obtained by silica gel column chromatography. Then proceed to the subsequent control steps with similar steps.

#### 4. Characterization data of the products

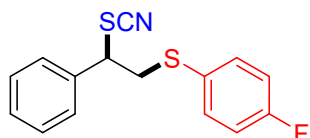

##### *(4-fluorophenyl)(2-phenyl-2-thiocyanatoethyl)sulfane (4aa).*

Purified by column chromatography on silica gel (20:1 petroleum ether/ethyl acetate) afforded **4aa** as a colorless liquid (49.8 mg, 86% yield).

$^1\text{H NMR}$  (400 MHz,  $\text{CDCl}_3$ )  $\delta$  7.40 – 7.32 (m, 5H), 7.29 – 7.25 (m, 2H), 7.04 – 6.97 (m, 2H), 4.41 (dd,  $J = 9.0, 6.6$  Hz, 1H), 3.65 – 3.50 (m, 2H).

$^{13}\text{C NMR}$  (100 MHz,  $\text{CDCl}_3$ )  $\delta$  162.68 (d,  $^1J_{\text{FC}} = 248.7$  Hz), 136.24, 134.32 (d,  $^3J_{\text{FC}} = 8.3$  Hz), 129.57, 129.32, 128.72 (d,  $^4J_{\text{FC}} = 3.4$  Hz), 127.92, 116.61 (d,  $^2J_{\text{FC}} = 22.0$  Hz), 111.21, 52.52, 41.11.

$^{19}\text{F NMR}$  (375 MHz,  $\text{CDCl}_3$ )  $\delta$  -112.79.

**HRMS**  $m/z$  (ESI) calcd. for  $\text{C}_{15}\text{H}_{13}\text{FNS}_2$  ( $[\text{M}+\text{H}]^+$ ): 290.0473, Found: 290.0481.

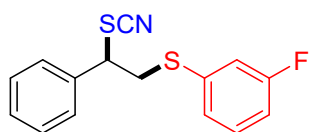

##### *(3-fluorophenyl)(2-phenyl-2-thiocyanatoethyl)sulfane (4ab).*

Purified by column chromatography on silica gel (20:1 petroleum ether/ethyl acetate) afforded **4ab** as a colorless liquid (41.7 mg, 72% yield).

$^1\text{H NMR}$  (400 MHz,  $\text{CDCl}_3$ )  $\delta$  7.38 (dd,  $J = 4.9, 2.0$  Hz, 3H), 7.33 – 7.23 (m, 3H), 7.12 (ddd,  $J = 7.8, 1.7, 1.0$  Hz, 1H), 7.02 (dt,  $J = 9.1, 2.1$  Hz, 1H), 6.95 (tdd,  $J = 8.4, 2.5, 0.9$  Hz, 1H), 4.47 (dd,  $J = 9.1, 6.4$  Hz, 1H), 3.72 – 3.58 (m, 2H).

$^{13}\text{C NMR}$  (100 MHz,  $\text{CDCl}_3$ )  $\delta$  162.92 (d,  $J = 249.5$  Hz), 136.25 (d,  $J = 7.8$  Hz), 136.17, 130.79 (d,  $J = 8.5$  Hz), 129.69, 129.38, 127.90, 126.18 (d,  $J = 3.0$  Hz), 117.59 (d,  $J = 22.8$  Hz), 114.60 (d,  $J = 21.1$  Hz), 111.12, 52.39, 39.80.

**HRMS**  $m/z$  (ESI) calcd. for  $\text{C}_{15}\text{H}_{13}\text{FNS}_2$  ( $[\text{M}+\text{H}]^+$ ): 290.0473, Found: 290.0478.

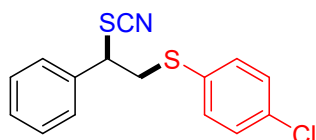

##### *(4-chlorophenyl)(2-phenyl-2-thiocyanatoethyl)sulfane (4ac).*

Purified by column chromatography on silica gel (20:1 petroleum ether/ethyl acetate) afforded **4ac** as a colorless liquid (49.5 mg, 81% yield).

$^1\text{H NMR}$  (400 MHz,  $\text{CDCl}_3$ )  $\delta$  7.40 – 7.35 (m, 3H), 7.27 (d,  $J = 5.8$  Hz, 6H), 4.43 (dd,  $J = 9.1,$

6.4 Hz, 1H), 3.72 – 3.52 (m, 2H).

$^{13}\text{C}$  NMR (100 MHz,  $\text{CDCl}_3$ )  $\delta$  136.03, 133.83, 132.56, 132.18, 129.52, 129.25, 127.79, 111.04, 52.31, 40.23.

HRMS  $m/z$  (ESI) calcd. for  $\text{C}_{15}\text{H}_{13}\text{ClNS}_2$  ( $[\text{M}+\text{H}]^+$ ): 306.0178, Found: 306.0198.

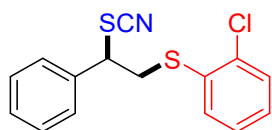

**(2-chlorophenyl)(2-phenyl-2-thiocyanatoethyl)sulfane (4ad).**

Purified by column chromatography on silica gel (20:1 petroleum ether/ethyl acetate) afforded **4ad** as a colorless liquid (43.4 mg, 71% yield).

$^1\text{H}$  NMR (400 MHz,  $\text{CDCl}_3$ )  $\delta$  7.41 (dd,  $J = 5.9, 3.5$  Hz, 1H), 7.39 – 7.34 (m, 4H), 7.33 – 7.27 (m, 2H), 7.21 (dd,  $J = 5.9, 3.5$  Hz, 2H), 4.49 (t,  $J = 7.7$  Hz, 1H), 3.68 (d,  $J = 7.8$  Hz, 2H).

$^{13}\text{C}$  NMR (100 MHz,  $\text{CDCl}_3$ )  $\delta$  136.24, 136.16, 132.83, 132.20, 130.37, 129.61, 129.32, 128.81, 127.87, 127.52, 111.12, 52.54, 38.80.

HRMS  $m/z$  (ESI) calcd. for  $\text{C}_{15}\text{H}_{13}\text{ClNS}_2$  ( $[\text{M}+\text{H}]^+$ ): 306.0178, Found: 306.0180.

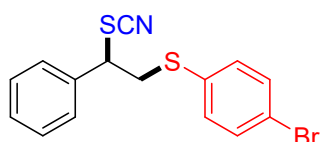

**(4-bromophenyl)(2-phenyl-2-thiocyanatoethyl)sulfane (4ae).**

Purified by column chromatography on silica gel (20:1 petroleum ether/ethyl acetate) afforded **4ae** as a colorless liquid (58.8 mg, 84% yield).

$^1\text{H}$  NMR (400 MHz,  $\text{CDCl}_3$ )  $\delta$  7.46 – 7.40 (m, 2H), 7.37 (q,  $J = 3.7$  Hz, 3H), 7.27 (dd,  $J = 4.4, 2.8$  Hz, 2H), 7.23 – 7.18 (m, 2H), 4.43 (dd,  $J = 9.2, 6.3$  Hz, 1H), 3.69 – 3.54 (m, 2H).

$^{13}\text{C}$  NMR (100 MHz,  $\text{CDCl}_3$ )  $\delta$  136.16, 133.03, 132.81, 132.59, 129.68, 129.40, 127.93, 121.90, 111.14, 52.43, 40.21.

HRMS  $m/z$  (ESI) calcd. for  $\text{C}_{15}\text{H}_{13}\text{BrNS}_2$  ( $[\text{M}+\text{H}]^+$ ): 349.9673, Found: 349.9678.

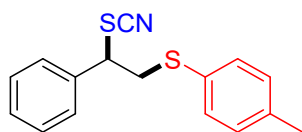

**(2-phenyl-2-thiocyanatoethyl)(p-tolyl)sulfane (4af).**

Purified by column chromatography on silica gel (20:1 petroleum ether/ethyl acetate) afforded **4af** as a colorless liquid (44.0 mg, 77% yield).

$^1\text{H}$  NMR (400 MHz,  $\text{CDCl}_3$ )  $\delta$  7.40 – 7.36 (m, 3H), 7.29 (dd,  $J = 8.0, 2.2$  Hz, 4H), 7.14 (d,  $J = 7.9$  Hz, 2H), 4.42 (dd,  $J = 8.8, 6.7$  Hz, 1H), 3.64 – 3.51 (m, 2H), 2.35 (s, 3H).

$^{13}\text{C}$  NMR (100 MHz,  $\text{CDCl}_3$ )  $\delta$  138.08, 136.60, 132.00, 130.26, 129.90, 129.46, 129.27, 127.95, 111.35, 52.51, 40.61, 21.21.

HRMS  $m/z$  (ESI) calcd. for  $\text{C}_{16}\text{H}_{16}\text{NS}_2$  ( $[\text{M}+\text{H}]^+$ ): 286.0724, Found: 286.0745.



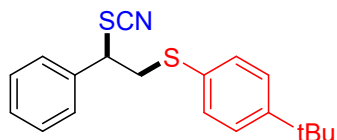

**(2-(tert-butyl)phenyl)(2-phenyl-2-thiocyanatoethyl)sulfane (4ag).**

Purified by column chromatography on silica gel (20:1 petroleum ether/ethyl acetate) afforded **4ag** as a colorless liquid (51.7 mg, 79% yield).

$^1\text{H NMR}$  (400 MHz,  $\text{CDCl}_3$ )  $\delta$  7.36 (td,  $J = 4.8, 4.4, 1.8$  Hz, 3H), 7.34 – 7.28 (m, 6H), 4.46 (dd,  $J = 8.8, 6.7$  Hz, 1H), 3.65 – 3.54 (m, 2H), 1.32 (s, 9H).

$^{13}\text{C NMR}$  (100 MHz,  $\text{CDCl}_3$ )  $\delta$  151.18, 136.61, 131.49, 130.10, 129.49, 129.28, 128.00, 126.56, 111.38, 52.64, 40.42, 34.75, 31.37.

**HRMS**  $m/z$  (ESI) calcd. for  $\text{C}_{19}\text{H}_{22}\text{NS}_2$  ( $[\text{M}+\text{H}]^+$ ): 328.1194, Found: 328.1198.

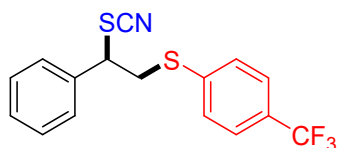

**(2-phenyl-2-thiocyanatoethyl)(4-(trifluoromethyl)phenyl)sulfane (4ah).**

Purified by column chromatography on silica gel (20:1 petroleum ether/ethyl acetate) afforded **4ah** as a colorless liquid (44.1 mg, 65% yield).

$^1\text{H NMR}$  (400 MHz,  $\text{CDCl}_3$ )  $\delta$  7.55 (d,  $J = 8.3$  Hz, 2H), 7.43 (d,  $J = 8.2$  Hz, 2H), 7.37 (td,  $J = 6.8, 6.3, 3.0$  Hz, 3H), 7.30 (dd,  $J = 7.7, 1.6$  Hz, 2H), 4.90 (t,  $J = 6.8$  Hz, 1H), 3.43 – 3.39 (m, 2H).

$^{13}\text{C NMR}$  (100 MHz,  $\text{CDCl}_3$ )  $\delta$  139.33, 135.89, 129.78, 129.65, 129.44, 129.05, 127.88, 126.23 (q,  $J = 3.8$  Hz), 125.38, 122.68, 111.07, 52.27, 39.08.

**HRMS**  $m/z$  (ESI) calcd. for  $\text{C}_{16}\text{H}_{13}\text{F}_3\text{NS}_2$  ( $[\text{M}+\text{H}]^+$ ): 340.0442, Found: 340.0451.

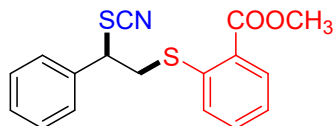

**methyl 2-((2-phenyl-2-thiocyanatoethyl)thio)benzoate (4ai).**

Purified by column chromatography on silica gel (10:1 petroleum ether/ethyl acetate) afforded **4ai** as a White solid (44.8 mg, 68% yield, mp  $71^\circ\text{C}\sim 73^\circ\text{C}$ ).

$^1\text{H NMR}$  (400 MHz,  $\text{CDCl}_3$ )  $\delta$  7.93 (dd,  $J = 7.8, 1.5$  Hz, 1H), 7.50 – 7.46 (m, 1H), 7.41 – 7.32 (m, 6H), 7.25 (td,  $J = 7.8, 1.1$  Hz, 1H), 4.60 (dd,  $J = 8.6, 6.6$  Hz, 1H), 3.87 (s, 3H), 3.77 – 3.65 (m, 2H).

$^{13}\text{C NMR}$  (100 MHz,  $\text{CDCl}_3$ )  $\delta$  166.91, 138.15, 136.44, 132.69, 131.48, 129.91, 129.62, 129.39, 127.86, 127.57, 125.67, 111.26, 52.39, 52.05, 38.33.

**HRMS**  $m/z$  (ESI) calcd. For  $\text{C}_{17}\text{H}_{16}\text{NO}_2\text{S}_2$  ( $[\text{M}+\text{H}]^+$ ): 330.0122, Found: 330.0134.

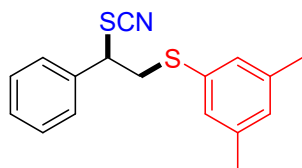

**(3,5-dimethylphenyl)(2-phenyl-2-thiocyanatoethyl)sulfane (4aj).**

Purified by column chromatography on silica gel (20:1 petroleum ether/ethyl acetate) afforded **4aj** as a colorless liquid (44.3 mg, 74% yield).

$^1\text{H NMR}$  (400 MHz,  $\text{CDCl}_3$ )  $\delta$  7.38 (dt,  $J = 3.9, 2.2$  Hz, 3H), 7.33 – 7.28 (m, 2H), 6.97 (s, 2H), 6.90 (s, 1H), 4.47 (dd,  $J = 9.0, 6.4$  Hz, 1H), 3.68 – 3.52 (m, 2H), 2.30 (s, 6H).

$^{13}\text{C NMR}$  (100 MHz,  $\text{CDCl}_3$ )  $\delta$  139.14, 136.59, 133.18, 130.58, 129.51, 129.48, 129.24, 128.73, 127.98, 111.41, 52.58, 39.95, 21.29.

**HRMS**  $m/z$  (ESI) calcd. for  $\text{C}_{17}\text{H}_{18}\text{NS}_2$  ( $[\text{M}+\text{H}]^+$ ): 300.0881, Found: 300.0892.

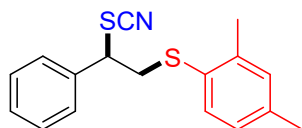

**(2,4-dimethylphenyl)(2-phenyl-2-thiocyanatoethyl)sulfane (4ak).**

Purified by column chromatography on silica gel (20:1 petroleum ether/ethyl acetate) afforded **4ak** as a colorless liquid (45.5 mg, 76% yield).

$^1\text{H NMR}$  (400 MHz,  $\text{CDCl}_3$ )  $\delta$  7.39 (td,  $J = 5.4, 2.3$  Hz, 3H), 7.32 – 7.27 (m, 3H), 7.06 – 6.98 (m, 2H), 4.42 (dd,  $J = 8.5, 7.0$  Hz, 1H), 3.55 (dd,  $J = 7.8, 4.0$  Hz, 2H), 2.33 (d,  $J = 3.4$  Hz, 6H).

$^{13}\text{C NMR}$  (100 MHz,  $\text{CDCl}_3$ )  $\delta$  140.11, 138.14, 136.70, 132.24, 131.75, 129.47, 129.27, 129.06, 127.95, 127.69, 111.34, 52.54, 39.71, 21.11, 20.62.

**HRMS**  $m/z$  (ESI) calcd. for  $\text{C}_{17}\text{H}_{18}\text{NS}_2$  ( $[\text{M}+\text{H}]^+$ ): 300.0881, Found: 300.0896.

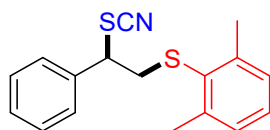

**(2,6-dimethylphenyl)(2-phenyl-2-thiocyanatoethyl)sulfane (4al).**

Purified by column chromatography on silica gel (20:1 petroleum ether/ethyl acetate) afforded **4al** as a colorless liquid (40.7 mg, 68% yield).

$^1\text{H NMR}$  (400 MHz,  $\text{CDCl}_3$ )  $\delta$  7.40 – 7.35 (m, 3H), 7.29 (dd,  $J = 6.7, 2.9$  Hz, 2H), 7.14 (dd,  $J = 8.7, 6.0$  Hz, 1H), 7.09 (d,  $J = 6.9$  Hz, 2H), 4.38 (dd,  $J = 9.0, 6.7$  Hz, 1H), 3.52 – 3.40 (m, 2H), 2.43 (s, 6H).

$^{13}\text{C NMR}$  (100 MHz,  $\text{CDCl}_3$ )  $\delta$  142.96, 136.53, 131.92, 129.51, 129.24, 128.91, 128.53, 127.89, 111.19, 52.94, 39.72, 22.05.

**HRMS**  $m/z$  (ESI) calcd. for  $\text{C}_{17}\text{H}_{18}\text{NS}_2$  ( $[\text{M}+\text{H}]^+$ ): 300.0881, Found: 300.0894.

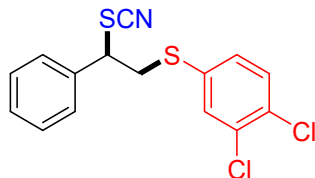

**(3,4-dichlorophenyl)(2-phenyl-2-thiocyanatoethyl)sulfane (4am).**

Purified by column chromatography on silica gel (20:1 petroleum ether/ethyl acetate) afforded **4am** as a colorless liquid (47.0 mg, 69% yield).

$^1\text{H NMR}$  (400 MHz,  $\text{CDCl}_3$ )  $\delta$  7.41 (d,  $J = 2.2$  Hz, 1H), 7.39 – 7.35 (m, 3H), 7.32 – 7.26 (m, 3H), 7.17 (dd,  $J = 8.4, 2.2$  Hz, 1H), 4.48 (dd,  $J = 8.3, 7.2$  Hz, 1H), 3.67 (dd,  $J = 7.7, 1.7$  Hz, 2H).

$^{13}\text{C NMR}$  (100 MHz,  $\text{CDCl}_3$ )  $\delta$  137.17, 135.97, 134.41, 133.35, 131.44, 130.23, 129.73, 129.40,

127.88, 127.82, 111.05, 52.54, 39.05.

**HRMS**  $m/z$  (ESI) calcd. for  $C_{15}H_{12}Cl_2NS_2$  ( $[M+H]^+$ ): 339.9788, Found: 339.9801.

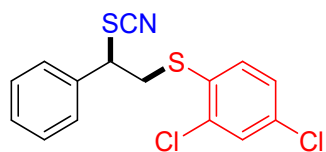

**(2,4-dichlorophenyl)(2-phenyl-2-thiocyanatoethyl)sulfane (4an).**

Purified by column chromatography on silica gel (20:1 petroleum ether/ethyl acetate) afforded **4an** as a colorless liquid (42.9 mg, 63% yield).

**$^1H$  NMR** (400 MHz,  $CDCl_3$ )  $\delta$  7.36 (ddt,  $J = 8.5, 5.0, 3.0$  Hz, 5H), 7.31 – 7.26 (m, 2H), 7.16 (dd,  $J = 8.4, 2.2$  Hz, 1H), 4.47 (dd,  $J = 9.3, 6.2$  Hz, 1H), 3.71 – 3.57 (m, 2H).

**$^{13}C$  NMR** (100 MHz,  $CDCl_3$ )  $\delta$  135.85, 134.14, 133.34, 132.59, 132.03, 131.10, 130.15, 129.78, 129.40, 127.89, 111.03, 52.43, 40.22.

**HRMS**  $m/z$  (ESI) calcd. for  $C_{15}H_{12}Cl_2NS_2$  ( $[M+H]^+$ ): 339.9788, Found: 339.9798.

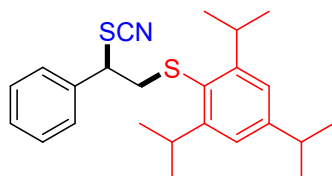

**(2-phenyl-2-thiocyanatoethyl)(2,4,6-triisopropylphenyl)sulfane (4ao).**

Purified by column chromatography on silica gel (10:1 petroleum ether/ethyl acetate) afforded **4ao** as a white solid (49.3 mg, 62% yield, mp 105°C~107 °C).

**$^1H$  NMR** (400 MHz,  $CDCl_3$ )  $\delta$  7.43 – 7.36 (m, 3H), 7.36 – 7.31 (m, 2H), 7.01 (s, 2H), 4.47 (dd,  $J = 9.0, 6.6$  Hz, 1H), 3.73 (p,  $J = 6.9$  Hz, 2H), 3.48 – 3.28 (m, 2H), 2.88 (p,  $J = 6.9$  Hz, 1H), 1.25 (d,  $J = 6.9$  Hz, 6H), 1.21 (dd,  $J = 6.8, 4.0$  Hz, 12H).

**$^{13}C$  NMR** (100 MHz,  $CDCl_3$ )  $\delta$  153.11, 150.43, 136.88, 129.50, 129.27, 127.81, 127.13, 122.24, 111.17, 52.72, 42.56, 34.41, 31.77, 24.68, 24.64, 24.01.

**HRMS**  $m/z$  (ESI) calcd. for  $C_{24}H_{32}NS_2$  ( $[M+H]^+$ ): 398.1976, Found: 398.1996.

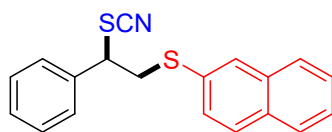

**naphthalen-2-yl(2-phenyl-2-thiocyanatoethyl)sulfane (4ap).**

Purified by column chromatography on silica gel (20:1 petroleum ether/ethyl acetate) afforded **4ap** as a colorless liquid (45.6 mg, 71% yield).

**$^1H$  NMR** (400 MHz,  $CDCl_3$ )  $\delta$  7.85 – 7.75 (m, 4H), 7.54 – 7.47 (m, 2H), 7.43 (dd,  $J = 8.5, 1.9$  Hz, 1H), 7.36 (dt,  $J = 4.7, 2.6$  Hz, 3H), 7.32 – 7.27 (m, 2H), 4.50 (dd,  $J = 9.2, 6.3$  Hz, 1H), 3.79 (dd,  $J = 14.1, 6.3$  Hz, 1H), 3.68 (dd,  $J = 14.1, 9.2$  Hz, 1H).

**$^{13}C$  NMR** (100 MHz,  $CDCl_3$ )  $\delta$  136.38, 133.80, 132.50, 130.98, 129.74, 129.58, 129.32, 129.23, 128.25, 127.96, 127.88, 127.52, 126.98, 126.59, 111.36, 52.41, 39.79.

**HRMS**  $m/z$  (ESI) calcd. for  $C_{19}H_{16}NS_2$  ( $[M+H]^+$ ): 322.0724, Found: 322.0745.

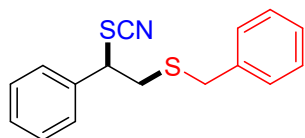

***benzyl(2-phenyl-2-thiocyanatoethyl)sulfane (4aq).***

Purified by column chromatography on silica gel (20:1 petroleum ether/ethyl acetate) afforded **4aq** as a colorless liquid (36.5 mg, 64% yield).

**<sup>1</sup>H NMR** (400 MHz, CDCl<sub>3</sub>) δ 7.38 (ddd, *J* = 4.7, 2.8, 1.3 Hz, 3H), 7.36 – 7.32 (m, 2H), 7.29 (td, *J* = 7.1, 6.4, 1.5 Hz, 3H), 7.25 – 7.22 (m, 2H), 4.28 (t, *J* = 7.8 Hz, 1H), 3.65 (d, *J* = 2.9 Hz, 2H), 3.19 – 3.15 (m, 2H).

**<sup>13</sup>C NMR** (100 MHz, CDCl<sub>3</sub>) δ 137.65, 136.75, 129.48, 129.28, 129.10, 128.92, 127.94, 127.65, 111.44, 53.22, 37.28, 36.99.

**HRMS** *m/z* (ESI) calcd. for C<sub>16</sub>H<sub>16</sub>NS<sub>2</sub> ([M+H]<sup>+</sup>): 286.0724, Found: 286.0730.

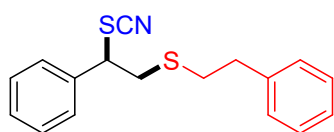

***phenethyl(2-phenyl-2-thiocyanatoethyl)sulfane (4ar).***

Purified by column chromatography on silica gel (20:1 petroleum ether/ethyl acetate) afforded **4ar** as a colorless liquid (39.5 mg, 66% yield).

**<sup>1</sup>H NMR** (400 MHz, CDCl<sub>3</sub>) δ 7.43 – 7.36 (m, 3H), 7.36 – 7.28 (m, 4H), 7.24 (d, *J* = 7.1 Hz, 1H), 7.18 – 7.13 (m, 2H), 4.48 (dd, *J* = 8.7, 6.7 Hz, 1H), 3.31 – 3.18 (m, 2H), 2.88 – 2.80 (m, 2H), 2.73 (dd, *J* = 8.1, 6.8 Hz, 2H).

**<sup>13</sup>C NMR** (100 MHz, CDCl<sub>3</sub>) δ 139.96, 136.83, 129.55, 129.34, 128.72, 128.66, 127.92, 126.73, 111.50, 53.60, 37.94, 36.31, 34.60.

**HRMS** *m/z* (ESI) calcd. for C<sub>17</sub>H<sub>18</sub>NS<sub>2</sub> ([M+H]<sup>+</sup>): 300.0881, Found: 300.0891.

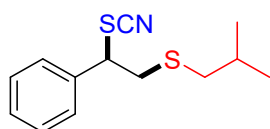

***isobutyl(2-phenyl-2-thiocyanatoethyl)sulfane (4as).***

Purified by column chromatography on silica gel (20:1 petroleum ether/ethyl acetate) afforded **4as** as a colorless liquid (29.7 mg, 59% yield).

**<sup>1</sup>H NMR** (400 MHz, CDCl<sub>3</sub>) δ 7.44 – 7.32 (m, 5H), 4.55 (dd, *J* = 8.8, 6.6 Hz, 1H), 3.31 – 3.17 (m, 2H), 2.35 (dd, *J* = 6.9, 2.0 Hz, 2H), 1.75 (dp, *J* = 13.4, 6.7 Hz, 1H), 0.95 (dd, *J* = 6.6, 5.5 Hz, 6H).

**<sup>13</sup>C NMR** (100 MHz, CDCl<sub>3</sub>) δ 136.98, 129.50, 129.31, 127.94, 111.59, 53.75, 42.29, 38.28, 28.69, 22.02, 21.95.

**HRMS** *m/z* (ESI) calcd. for C<sub>13</sub>H<sub>18</sub>NS<sub>2</sub> ([M+H]<sup>+</sup>): 252.0881, Found: 252.0889.

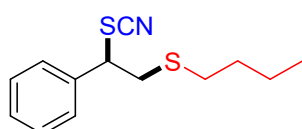

***butyl(2-phenyl-2-thiocyanatoethyl)sulfane (4at).***

Purified by column chromatography on silica gel (20:1 petroleum ether/ethyl acetate) afforded **4at** as a colorless liquid (31.2 mg, 62% yield).

$^1\text{H NMR}$  (400 MHz,  $\text{CDCl}_3$ )  $\delta$  7.43 – 7.30 (m, 5H), 4.88 (dd,  $J = 7.6, 5.9$  Hz, 1H), 3.05 – 2.92 (m, 2H), 2.52 – 2.45 (m, 2H), 1.55 – 1.50 (m, 2H), 1.38 (q,  $J = 7.5$  Hz, 2H), 0.90 (t,  $J = 7.3$  Hz, 3H).

$^{13}\text{C NMR}$  (100 MHz,  $\text{CDCl}_3$ )  $\delta$  136.94, 129.51, 129.31, 127.92, 111.59, 53.68, 37.69, 32.75, 31.64, 21.94, 13.71.

**HRMS**  $m/z$  (ESI) calcd. for  $\text{C}_{13}\text{H}_{18}\text{NS}_2$  ( $[\text{M}+\text{H}]^+$ ): 252.0881, Found: 252.0893.

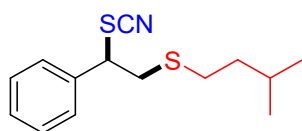

***isopentyl(2-phenyl-2-thiocyanatoethyl)sulfane (4au).***

Purified by column chromatography on silica gel (20:1 petroleum ether/ethyl acetate) afforded **4au** as a colorless liquid (31.8 mg, 60% yield).

$^1\text{H NMR}$  (400 MHz,  $\text{CDCl}_3$ )  $\delta$  7.47 – 7.30 (m, 5H), 4.88 (dd,  $J = 7.5, 5.9$  Hz, 1H), 3.05 – 2.92 (m, 2H), 2.52 – 2.43 (m, 2H), 1.63 (dt,  $J = 13.3, 6.7$  Hz, 1H), 1.48 – 1.40 (m, 2H), 0.88 (d,  $J = 6.6$  Hz, 6H).

$^{13}\text{C NMR}$  (100 MHz,  $\text{CDCl}_3$ )  $\delta$  136.96, 129.50, 129.30, 127.92, 111.54, 53.71, 38.52, 37.70, 31.09, 27.45, 22.33.

**HRMS**  $m/z$  (ESI) calcd. for  $\text{C}_{14}\text{H}_{20}\text{NS}_2$  ( $[\text{M}+\text{H}]^+$ ): 266.1037, Found: 266.1049.

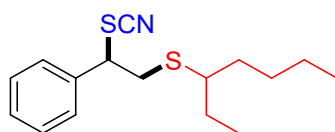

***heptan-3-yl(2-phenyl-2-thiocyanatoethyl)sulfane (4av).***

Purified by column chromatography on silica gel (20:1 petroleum ether/ethyl acetate) afforded **4av** as a colorless liquid (34.6 mg, 59% yield).

$^1\text{H NMR}$  (400 MHz,  $\text{CDCl}_3$ )  $\delta$  7.37 (dd,  $J = 8.4, 4.7$  Hz, 5H), 4.60 – 4.49 (m, 1H), 3.32 – 3.18 (m, 2H), 2.51 – 2.39 (m, 2H), 1.40 – 1.15 (m, 9H), 0.93 – 0.81 (m, 6H).

$^{13}\text{C NMR}$  (100 MHz,  $\text{CDCl}_3$ )  $\delta$  137.14, 129.48, 129.31, 127.97, 111.49, 53.90, 39.52, 38.54, 37.87, 32.45, 28.96, 25.67, 23.06, 14.15, 10.87.

**HRMS**  $m/z$  (ESI) calcd. for  $\text{C}_{16}\text{H}_{24}\text{NS}_2$  ( $[\text{M}+\text{H}]^+$ ): 294.1350, Found: 294.1370.

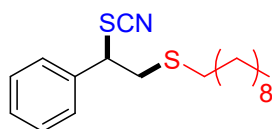

***decyl(2-phenyl-2-thiocyanatoethyl)sulfane (4aw).***

Purified by column chromatography on silica gel (20:1 petroleum ether/ethyl acetate) afforded **4aw** as a colorless liquid (35.6 mg, 53% yield).

$^1\text{H NMR}$  (400 MHz,  $\text{CDCl}_3$ )  $\delta$  7.45 – 7.31 (m, 5H), 4.55 (dd,  $J = 8.8, 6.7$  Hz, 1H), 3.33 – 3.18 (m, 2H), 2.50 – 2.41 (m, 2H), 1.52 (q,  $J = 7.6$  Hz, 2H), 1.33 – 1.21 (m, 14H), 0.88 (t,  $J = 6.9$  Hz, 3H).

$^{13}\text{C NMR}$  (100 MHz,  $\text{CDCl}_3$ )  $\delta$  136.98, 129.52, 129.33, 127.94, 53.72, 37.73, 33.12, 32.03,

29.67, 29.62, 29.43, 29.27, 28.85, 22.82, 14.25.

HRMS  $m/z$  (ESI) calcd. for  $C_{19}H_{30}NS_2$  ( $[M+H]^+$ ): 336.1820, Found: 336.1841.

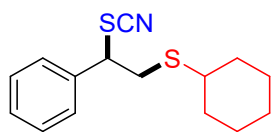

***cyclohexyl(2-phenyl-2-thiocyanatoethyl)sulfane (4ax).***

Purified by column chromatography on silica gel (20:1 petroleum ether/ethyl acetate) afforded **4ax** as a colorless liquid (28.9 mg, 52% yield).

$^1H$  NMR (400 MHz,  $CDCl_3$ )  $\delta$  7.45 – 7.29 (m, 5H), 4.55 (dd,  $J = 8.9, 6.6$  Hz, 1H), 3.37 – 3.19 (m, 2H), 2.57 (ddt,  $J = 10.5, 7.6, 3.6$  Hz, 1H), 1.97 – 1.83 (m, 2H), 1.78 – 1.71 (m, 2H), 1.63 – 1.55 (m, 1H), 1.26 (dt,  $J = 19.0, 10.5$  Hz, 5H).

$^{13}C$  NMR (100 MHz,  $CDCl_3$ )  $\delta$  137.01, 129.49, 129.29, 127.94, 111.64, 54.01, 44.76, 35.70, 33.73, 33.65, 26.11, 25.77.

HRMS  $m/z$  (ESI) calcd. for  $C_{15}H_{20}NS_2$  ( $[M+H]^+$ ): 278.1037, Found: 278.1048.

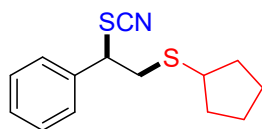

***cyclopentyl(2-phenyl-2-thiocyanatoethyl)sulfane (4ay).***

Purified by column chromatography on silica gel (20:1 petroleum ether/ethyl acetate) afforded **4ay** as a colorless liquid (27.9 mg, 53% yield).

$^1H$  NMR (400 MHz,  $CDCl_3$ )  $\delta$  7.38 (ddt,  $J = 8.2, 6.1, 3.3$  Hz, 5H), 4.58 (dd,  $J = 8.9, 6.6$  Hz, 1H), 3.38 – 3.21 (m, 2H), 3.05 (p,  $J = 7.0$  Hz, 1H), 2.07 – 1.91 (m, 2H), 1.72 (tddd,  $J = 11.4, 8.7, 5.5, 2.2$  Hz, 2H), 1.61 – 1.54 (m, 2H), 1.54 – 1.43 (m, 2H).

$^{13}C$  NMR (100 MHz,  $CDCl_3$ )  $\delta$  137.00, 129.51, 129.32, 127.93, 111.63, 53.74, 44.86, 37.48, 33.99, 33.85, 24.83.

HRMS  $m/z$  (ESI) calcd. for  $C_{14}H_{18}NS_2$  ( $[M+H]^+$ ): 264.0881, Found: 264.0894.

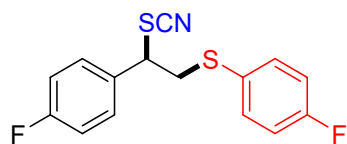

***(4-fluorophenyl)(2-(4-fluorophenyl)-2-thiocyanatoethyl)sulfane (4ba).***

Purified by column chromatography on silica gel (20:1 petroleum ether/ethyl acetate) afforded **4ba** as a colorless liquid (51.6 mg, 84% yield).

$^1H$  NMR (400 MHz,  $CDCl_3$ )  $\delta$  7.30 – 7.23 (m, 2H), 7.21 – 7.15 (m, 2H), 7.03 – 6.90 (m, 4H), 4.33 (dd,  $J = 9.2, 6.4$  Hz, 1H), 3.58 – 3.37 (m, 2H).

$^{13}C$  NMR (100 MHz,  $CDCl_3$ )  $\delta$  163.96 (d,  $^1J_{FC} = 251.3$  Hz), 163.97 (d,  $J = 251.6$  Hz), 134.40 (d,  $^3J_{FC} = 8.3$  Hz), 132.17 (d,  $J = 3.3$  Hz), 129.84 (d,  $J = 8.5$  Hz), 128.58 (d,  $^4J_{FC} = 3.4$  Hz), 116.72 (d,  $J = 22.0$  Hz), 116.43 (d,  $^2J_{FC} = 21.9$  Hz), 110.96, 51.83, 41.21.

HRMS  $m/z$  (ESI) calcd. for  $C_{15}H_{12}F_2NS_2$  ( $[M+H]^+$ ): 308.0379, Found: 308.0391.

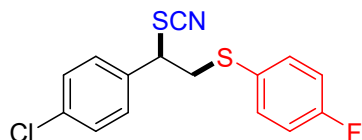

**(2-(4-chlorophenyl)-2-thiocyanatoethyl)(4-fluorophenyl)sulfane (4ca).**

Purified by column chromatography on silica gel (20:1 petroleum ether/ethyl acetate) afforded **4ca** as a colorless liquid (53.1 mg, 82% yield).

$^1\text{H NMR}$  (400 MHz,  $\text{CDCl}_3$ )  $\delta$  7.34 (dd,  $J = 8.4, 5.9$  Hz, 4H), 7.23 – 7.17 (m, 2H), 7.05 – 6.98 (m, 2H), 4.37 (dd,  $J = 9.2, 6.4$  Hz, 1H), 3.61 – 3.45 (m, 2H).

$^{13}\text{C NMR}$  (100 MHz,  $\text{CDCl}_3$ )  $\delta$  162.82 (d,  $^1J_{\text{FC}} = 249.2$  Hz), 135.62, 134.85, 134.45 (d,  $^3J_{\text{FC}} = 8.3$  Hz), 129.58, 129.30, 128.47 (d,  $^4J_{\text{FC}} = 3.4$  Hz), 116.74 (d,  $^2J_{\text{FC}} = 22.0$  Hz), 110.82, 51.78, 41.01.

**HRMS**  $m/z$  (ESI) calcd. for  $\text{C}_{15}\text{H}_{12}\text{ClFNS}_2$  ( $[\text{M}+\text{H}]^+$ ): 324.0084, Found: 324.0091.

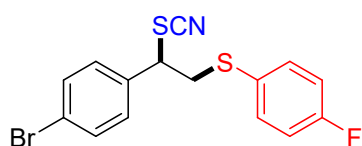

**(2-(4-bromophenyl)-2-thiocyanatoethyl)(4-fluorophenyl)sulfane (4da).**

Purified by column chromatography on silica gel (20:1 petroleum ether/ethyl acetate) afforded **4da** as a colorless liquid (54.5 mg, 74% yield).

$^1\text{H NMR}$  (400 MHz,  $\text{CDCl}_3$ )  $\delta$  7.53 – 7.47 (m, 2H), 7.38 – 7.30 (m, 2H), 7.18 – 7.11 (m, 2H), 7.07 – 6.98 (m, 2H), 4.35 (dd,  $J = 9.2, 6.4$  Hz, 1H), 3.60 – 3.45 (m, 2H).

$^{13}\text{C NMR}$  (100 MHz,  $\text{CDCl}_3$ )  $\delta$  162.82 (d,  $^1J_{\text{FC}} = 249.1$  Hz), 135.36, 134.46 (d,  $^3J_{\text{FC}} = 8.3$  Hz), 132.55, 129.56, 128.44 (d,  $^4J_{\text{FC}} = 3.5$  Hz), 123.77, 116.75 (d,  $^2J_{\text{FC}} = 22.0$  Hz), 110.80, 51.82, 40.94.

**HRMS**  $m/z$  (ESI) calcd. for  $\text{C}_{15}\text{H}_{12}\text{BrFNS}_2$  ( $[\text{M}+\text{H}]^+$ ): 367.9579, Found: 367.9584.

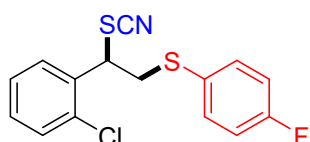

**(2-(2-chlorophenyl)-2-thiocyanatoethyl)(4-fluorophenyl)sulfane (4ea).**

Purified by column chromatography on silica gel (20:1 petroleum ether/ethyl acetate) afforded **4ea** as a colorless liquid (48.5 mg, 75% yield).

$^1\text{H NMR}$  (400 MHz,  $\text{CDCl}_3$ )  $\delta$  7.38 – 7.28 (m, 4H), 7.24 (t,  $J = 1.7$  Hz, 1H), 7.19 – 7.14 (m, 1H), 7.05 – 6.98 (m, 2H), 4.35 (dd,  $J = 9.0, 6.6$  Hz, 1H), 3.59 – 3.47 (m, 2H).

$^{13}\text{C NMR}$  (100 MHz,  $\text{CDCl}_3$ )  $\delta$  162.83 (d,  $^1J_{\text{FC}} = 249.2$  Hz), 138.34, 135.26, 134.49 (d,  $^3J_{\text{FC}} = 8.3$  Hz), 130.59, 129.81, 128.45 (d,  $^4J_{\text{FC}} = 3.5$  Hz), 128.15, 126.16, 116.74 (d,  $^2J_{\text{FC}} = 22.0$  Hz), 110.70, 51.91, 40.99.

**HRMS**  $m/z$  (ESI) calcd. for  $\text{C}_{15}\text{H}_{12}\text{ClFNS}_2$  ( $[\text{M}+\text{H}]^+$ ): 324.0084, Found: 324.0089.

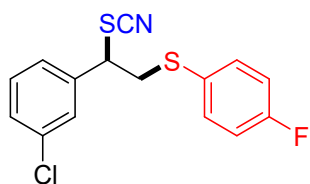

**(2-(3-chlorophenyl)-2-thiocyanatoethyl)(4-fluorophenyl)sulfane (4fa).**

Purified by column chromatography on silica gel (20:1 petroleum ether/ethyl acetate) afforded **4fa** as a colorless liquid (51.2 mg, 79% yield).

<sup>1</sup>H NMR (400 MHz, CDCl<sub>3</sub>) δ 7.44 – 7.40 (m, 1H), 7.40 – 7.35 (m, 3H), 7.33 – 7.29 (m, 2H), 7.04 – 6.98 (m, 2H), 4.86 (dd, *J* = 8.7, 7.0 Hz, 1H), 3.67 – 3.53 (m, 2H).

<sup>13</sup>C NMR (100 MHz, CDCl<sub>3</sub>) δ 162.82 (d, <sup>1</sup>*J*<sub>FC</sub> = 249.2 Hz), 138.31, 135.25, 134.50 (d, <sup>3</sup>*J*<sub>FC</sub> = 8.3 Hz), 130.59, 129.81, 128.27 (d, <sup>4</sup>*J*<sub>FC</sub> = 3.5 Hz), 126.16, 116.75 (d, <sup>2</sup>*J*<sub>FC</sub> = 22.0 Hz), 110.73, 51.89, 40.97.

HRMS *m/z* (ESI) calcd. for C<sub>15</sub>H<sub>12</sub>ClFNS<sub>2</sub> ([M+H]<sup>+</sup>): 324.0084, Found: 324.0097.

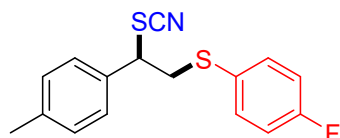

**(4-fluorophenyl)(2-thiocyanato-2-(*p*-tolyl)ethyl)sulfane (4ga).**

Purified by column chromatography on silica gel (20:1 petroleum ether/ethyl acetate) afforded **4ga** as a colorless liquid (49.7 mg, 82% yield).

<sup>1</sup>H NMR (400 MHz, CDCl<sub>3</sub>) δ 7.37 – 7.32 (m, 2H), 7.19 – 7.14 (m, 4H), 7.03 – 6.98 (m, 2H), 4.40 (dd, *J* = 9.1, 6.5 Hz, 1H), 3.62 – 3.49 (m, 2H), 2.36 (s, 3H).

<sup>13</sup>C NMR (100 MHz, CDCl<sub>3</sub>) δ 162.38 (d, <sup>1</sup>*J*<sub>FC</sub> = 248.7 Hz), 139.41, 133.97 (d, <sup>3</sup>*J*<sub>FC</sub> = 8.3 Hz), 132.83, 129.71, 128.48 (d, <sup>4</sup>*J*<sub>FC</sub> = 3.5 Hz), 127.52, 116.29 (d, <sup>2</sup>*J*<sub>FC</sub> = 22.0 Hz), 111.09, 52.11, 40.84, 21.05.

HRMS *m/z* (ESI) calcd. for C<sub>16</sub>H<sub>15</sub>FNS<sub>2</sub> ([M+H]<sup>+</sup>): 304.0630, Found: 304.0654.

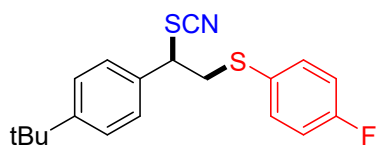

**(2-(4-(tert-butyl)phenyl)-2-thiocyanatoethyl)(4-fluorophenyl)sulfane (4ha).**

Purified by column chromatography on silica gel (20:1 petroleum ether/ethyl acetate) afforded **4ha** as a colorless liquid (58.0 mg, 84% yield).

<sup>1</sup>H NMR (400 MHz, CDCl<sub>3</sub>) δ 7.37 – 7.30 (m, 4H), 7.18 (d, *J* = 8.4 Hz, 2H), 7.01 – 6.94 (m, 2H), 4.43 (dd, *J* = 8.8, 6.7 Hz, 1H), 3.63 – 3.52 (m, 2H), 1.31 (s, 9H).

<sup>13</sup>C NMR (100 MHz, CDCl<sub>3</sub>) δ 162.61 (d, <sup>1</sup>*J*<sub>FC</sub> = 248.5 Hz), 152.76, 134.32 (d, <sup>3</sup>*J*<sub>FC</sub> = 8.2 Hz), 132.99, 128.91 (d, <sup>4</sup>*J*<sub>FC</sub> = 3.4 Hz), 127.62, 126.23, 116.53 (d, <sup>2</sup>*J*<sub>FC</sub> = 22.0 Hz), 111.49, 52.57, 41.21, 34.85, 31.34.

HRMS *m/z* (ESI) calcd. for C<sub>19</sub>H<sub>21</sub>FNS<sub>2</sub> ([M+H]<sup>+</sup>): 346.1099, Found: 346.1104.

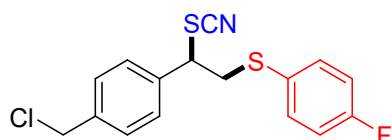

**(2-(4-(chloromethyl)phenyl)-2-thiocyanatoethyl)(4-fluorophenyl)sulfane (4ia).** Purified by column chromatography on silica gel (20:1 petroleum ether/ethyl acetate) afforded **4ia** as a colorless liquid (55.4 mg, 82% yield).

<sup>1</sup>H NMR (400 MHz, CDCl<sub>3</sub>) δ 7.40 (d, *J* = 8.2 Hz, 2H), 7.36 – 7.31 (m, 2H), 7.27 (d, *J* = 8.2 Hz, 2H), 7.04 – 6.97 (m, 2H), 4.58 (s, 2H), 4.42 (dd, *J* = 9.0, 6.6 Hz, 1H), 3.64 – 3.48 (m, 2H).



$^{13}\text{C}$  NMR (100 MHz,  $\text{CDCl}_3$ )  $\delta$  163.02 (d,  $^1J_{\text{FC}} = 248.9$  Hz), 139.21, 136.78, 134.71 (d,  $^3J_{\text{FC}} = 8.3$  Hz), 129.75, 128.89 (d,  $^4J_{\text{FC}} = 3.4$  Hz), 128.64, 116.98 (d,  $^2J_{\text{FC}} = 22.0$  Hz), 111.30, 52.44, 45.80, 41.34.

HRMS  $m/z$  (ESI) calcd. for  $\text{C}_{16}\text{H}_{14}\text{ClFNS}_2$  ( $[\text{M}+\text{H}]^+$ ): 338.0248, Found: 338.0251.

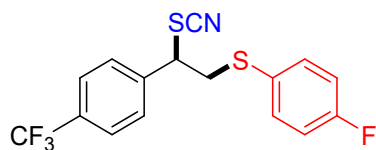

**(4-fluorophenyl)(2-thiocyanato-2-(4-(trifluoromethyl)phenyl)ethyl)sulfane (4ja).**

Purified by column chromatography on silica gel (20:1 petroleum ether/ethyl acetate) afforded **4ja** as a colorless liquid (47.9 mg, 67% yield).

$^1\text{H}$  NMR (400 MHz,  $\text{CDCl}_3$ )  $\delta$  7.63 (d,  $J = 8.2$  Hz, 2H), 7.40 (d,  $J = 8.1$  Hz, 2H), 7.33 (dd,  $J = 8.8, 5.2$  Hz, 2H), 7.00 (t,  $J = 8.6$  Hz, 2H), 4.43 (dd,  $J = 9.0, 6.5$  Hz, 1H), 3.63 – 3.49 (m, 2H).

$^{13}\text{C}$  NMR (100 MHz,  $\text{CDCl}_3$ )  $\delta$  162.64 (d,  $^1J_{\text{FC}} = 249.4$  Hz), 140.15, 134.34 (d,  $^3J_{\text{FC}} = 8.3$  Hz), 131.48 (q,  $J = 32.9$  Hz), 128.22, 128.07 (d,  $^4J_{\text{FC}} = 3.4$  Hz), 126.11 (q,  $J = 3.8$  Hz), 124.44, 122.64, 120.84, 116.57 (d,  $^2J_{\text{FC}} = 22.1$  Hz), 110.31, 51.48, 40.66.

$^{19}\text{F}$  NMR (375 MHz,  $\text{CDCl}_3$ )  $\delta$  -62.86, -112.46.

HRMS  $m/z$  (ESI) calcd. for  $\text{C}_{16}\text{H}_{12}\text{F}_4\text{NS}_2$  ( $[\text{M}+\text{H}]^+$ ): 358.0374, Found: 358.0376.

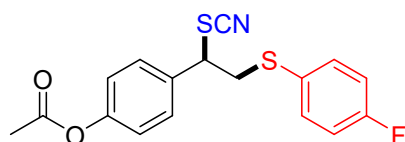

**(2-((4-fluorophenyl)thio)-1-thiocyanatoethyl)phenyl acetate (4ka).**

Purified by column chromatography on silica gel (20:1 petroleum ether/ethyl acetate) afforded **4ka** as a colorless liquid (51.4 mg, 74% yield).

$^1\text{H}$  NMR (400 MHz,  $\text{CDCl}_3$ )  $\delta$  7.32 (dd,  $J = 8.5, 5.2$  Hz, 2H), 7.28 (s, 2H), 7.13 – 7.07 (m, 2H), 7.00 (t,  $J = 8.5$  Hz, 2H), 4.41 (dd,  $J = 8.9, 6.5$  Hz, 1H), 3.63 – 3.46 (m, 2H), 2.29 (s, 3H).

$^{13}\text{C}$  NMR (100 MHz,  $\text{CDCl}_3$ )  $\delta$  169.03, 162.78 (d,  $^1J_{\text{FC}} = 248.9$  Hz), 151.51, 134.39 (d,  $^3J_{\text{FC}} = 8.3$  Hz), 133.77, 129.08, 128.76 (d,  $^4J_{\text{FC}} = 3.5$  Hz), 122.48, 116.67 (d,  $^2J_{\text{FC}} = 22.0$  Hz), 110.93, 52.08, 41.28, 21.18.

HRMS  $m/z$  (ESI) calcd. for  $\text{C}_{17}\text{H}_{15}\text{FNO}_2\text{S}_2$  ( $[\text{M}+\text{H}]^+$ ): 348.0548, Found: 348.0554.

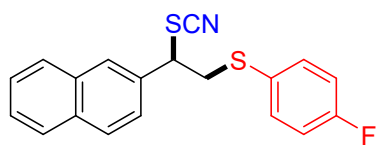

**(4-fluorophenyl)(2-(naphthalen-2-yl)-2-thiocyanatoethyl)sulfane (4la).**

Purified by column chromatography on silica gel (20:1 petroleum ether/ethyl acetate) afforded **4la** as a colorless liquid (44.1 mg, 65% yield).

$^1\text{H}$  NMR (400 MHz,  $\text{CDCl}_3$ )  $\delta$  7.84 (dd,  $J = 7.9, 3.1$  Hz, 3H), 7.71 (s, 1H), 7.56 – 7.48 (m, 2H), 7.47 – 7.40 (m, 2H), 7.33 (dd,  $J = 8.6, 1.8$  Hz, 1H), 7.05 – 6.98 (m, 2H), 4.96 (dd,  $J = 7.8, 5.9$  Hz, 1H), 3.41 – 3.31 (m, 2H).

$^{13}\text{C}$  NMR (100 MHz,  $\text{CDCl}_3$ )  $\delta$  162.69 (d,  $^1J_{\text{FC}} = 248.8$  Hz), 134.37 (d,  $^3J_{\text{FC}} = 8.3$  Hz), 133.67, 133.39, 133.16, 129.49, 128.73 (d,  $^4J_{\text{FC}} = 3.3$  Hz), 128.25, 127.93, 127.82, 127.23, 127.03, 124.60, 116.59 (d,  $^2J_{\text{FC}} = 22.0$  Hz), 111.21, 52.94, 41.07.

**HRMS**  $m/z$  (ESI) calcd. for  $C_{19}H_{15}FNS_2$  ( $[M+H]^+$ ): 340.0630, Found: 340.0641.

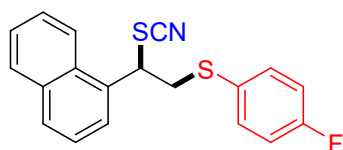

**(4-fluorophenyl)(2-(naphthalen-1-yl)-2-thiocyanatoethyl)sulfane (4ma).**

Purified by column chromatography on silica gel (20:1 petroleum ether/ethyl acetate) afforded **4ma** as a colorless liquid (42.1 mg, 62% yield).

**$^1H$  NMR** (400 MHz,  $CDCl_3$ )  $\delta$  7.93 – 7.85 (m, 2H), 7.82 (d,  $J = 8.3$  Hz, 1H), 7.60 – 7.51 (m, 3H), 7.47 (t,  $J = 7.7$  Hz, 1H), 7.29 (dd,  $J = 8.5, 5.3$  Hz, 2H), 6.96 (t,  $J = 8.6$  Hz, 2H), 5.26 (t,  $J = 7.6$  Hz, 1H), 3.82 (dd,  $J = 7.7, 2.2$  Hz, 2H).

**$^{13}C$  NMR** (100 MHz,  $CDCl_3$ )  $\delta$  163.84, 161.37, 134.29, 134.21, 134.08, 131.31, 130.79, 130.19, 129.43, 128.82, 127.13, 126.30, 125.24, 121.91, 116.51, 116.29, 111.09, 77.31, 77.00, 76.68, 47.87, 41.17.

**HRMS**  $m/z$  (ESI) calcd. for  $C_{19}H_{15}FNS_2$  ( $[M+H]^+$ ): 340.0630, Found: 340.0635.

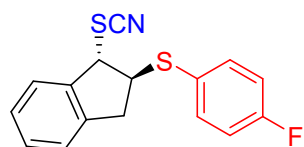

**(4-fluorophenyl)(1-thiocyanato-2,3-dihydro-1H-inden-2-yl)sulfane (4na).**

Purified by column chromatography on silica gel (20:1 petroleum ether/ethyl acetate) afforded **4na** as a colorless liquid (37.4 mg, 62% yield).

**$^1H$  NMR** (400 MHz,  $CDCl_3$ )  $\delta$  7.51 – 7.45 (m, 2H), 7.40 – 7.27 (m, 5H), 7.07 (t,  $J = 8.6$  Hz, 2H), 4.71 (d,  $J = 2.2$  Hz, 1H), 4.17 (dt,  $J = 7.1, 2.5$  Hz, 1H), 3.67 (dd,  $J = 17.1, 7.1$  Hz, 1H), 3.01 (dd,  $J = 17.1, 2.5$  Hz, 1H).

**$^{13}C$  NMR** (100 MHz,  $CDCl_3$ )  $\delta$  162.86 (d,  $^1J_{FC} = 249.1$  Hz), 141.92, 137.01, 135.02 (d,  $^3J_{FC} = 8.3$  Hz), 130.17, 128.20 (d,  $^4J_{FC} = 3.4$  Hz), 128.10, 126.00, 125.54, 116.61 (d,  $^2J_{FC} = 22.0$  Hz), 111.20, 58.15, 54.13, 37.35.

**HRMS**  $m/z$  (ESI) calcd. for  $C_{16}H_{13}FNS_2$  ( $[M+H]^+$ ): 302.0473, Found: 302.0493.

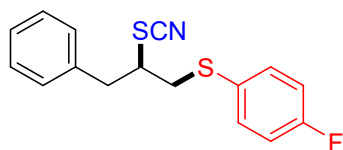

**(4-fluorophenyl)(3-phenyl-2-thiocyanatopropyl)sulfane (4oa).**

Purified by column chromatography on silica gel (20:1 petroleum ether/ethyl acetate) afforded **4oa** as a colorless liquid (39.4 mg, 65% yield).

**$^1H$  NMR** (400 MHz,  $CDCl_3$ )  $\delta$  7.44 – 7.39 (m, 2H), 7.38 – 7.31 (m, 2H), 7.31 – 7.26 (m, 1H), 7.25 – 7.20 (m, 2H), 7.07 – 7.00 (m, 2H), 3.50 (qd,  $J = 7.0, 5.7$  Hz, 1H), 3.19 – 2.96 (m, 4H).

**$^{13}C$  NMR** (100 MHz,  $CDCl_3$ )  $\delta$  163.46 (d,  $^1J_{FC} = 249.6$  Hz), 137.48, 136.37 (d,  $^3J_{FC} = 8.4$  Hz), 129.64, 129.26, 127.70, 117.03 (d,  $^2J_{FC} = 21.9$  Hz), 112.47, 51.23, 39.55, 38.92.

**HRMS**  $m/z$  (ESI) calcd. for  $C_{16}H_{15}FNS_2$  ( $[M+H]^+$ ): 304.0630, Found: 304.0637.

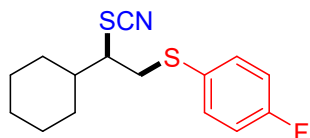

**(2-cyclohexyl-2-thiocyanatoethyl)(4-fluorophenyl)sulfane (4pa).**

Purified by column chromatography on silica gel (20:1 petroleum ether/ethyl acetate) afforded **4pa** as a colorless liquid (34.3 mg, 58% yield).

$^1\text{H NMR}$  (400 MHz,  $\text{CDCl}_3$ )  $\delta$  7.48 – 7.42 (m, 2H), 7.07 – 7.00 (m, 2H), 3.29 – 3.17 (m, 2H), 3.13 – 3.06 (m, 1H), 1.80 (dtd,  $J = 16.5, 8.9, 7.5, 4.3$  Hz, 5H), 1.48 – 1.07 (m, 6H).

$^{13}\text{C NMR}$  (100 MHz,  $\text{CDCl}_3$ )  $\delta$  162.85 (d,  $^1J_{\text{FC}} = 248.9$  Hz), 135.42 (d,  $^3J_{\text{FC}} = 8.3$  Hz), 128.98 (d,  $^4J_{\text{FC}} = 3.5$  Hz), 116.65 (d,  $^2J_{\text{FC}} = 21.9$  Hz), 112.41, 56.91, 39.92, 37.67, 31.11, 28.99, 26.30, 26.22.

$^{19}\text{F NMR}$  (375 MHz,  $\text{CDCl}_3$ )  $\delta$  -112.84.

**HRMS**  $m/z$  (ESI) calcd. for  $\text{C}_{15}\text{H}_{19}\text{FNS}_2$  ( $[\text{M}+\text{H}]^+$ ): 296.0943, Found: 296.0956.

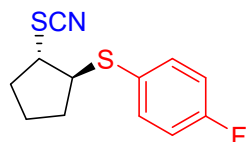

**(4-fluorophenyl)(2-thiocyanatocyclopentyl)sulfane (4qa).**

Purified by column chromatography on silica gel (20:1 petroleum ether/ethyl acetate) afforded **4qa** as a colorless liquid (27.9 mg, 55% yield).

$^1\text{H NMR}$  (400 MHz,  $\text{CDCl}_3$ )  $\delta$  7.49 – 7.42 (m, 2H), 7.08 – 7.00 (m, 2H), 3.56 (dt,  $J = 7.4, 4.9$  Hz, 1H), 3.47 (dt,  $J = 7.0, 4.6$  Hz, 1H), 2.45 – 2.36 (m, 1H), 2.30 (dq,  $J = 14.6, 7.4$  Hz, 1H), 1.86 (pt,  $J = 6.9, 3.0$  Hz, 3H), 1.81 – 1.70 (m, 1H).

$^{13}\text{C NMR}$  (100 MHz,  $\text{CDCl}_3$ )  $\delta$  162.90 (d,  $^1J_{\text{FC}} = 248.8$  Hz), 135.24 (d,  $^3J_{\text{FC}} = 8.3$  Hz), 128.59 (d,  $^4J_{\text{FC}} = 3.4$  Hz), 116.57 (d,  $^2J_{\text{FC}} = 21.9$  Hz), 111.46, 54.38, 53.08, 32.18, 31.53, 23.09.

$^{19}\text{F NMR}$  (375 MHz,  $\text{CDCl}_3$ )  $\delta$  -112.81.

**HRMS**  $m/z$  (ESI) calcd. for  $\text{C}_{12}\text{H}_{13}\text{FNS}_2$  ( $[\text{M}+\text{H}]^+$ ): 254.0473, Found: 254.0479.

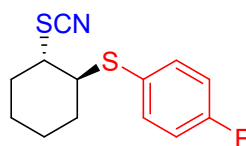

**(4-fluorophenyl)(2-thiocyanatocyclohexyl)sulfane (4ra).**

Purified by column chromatography on silica gel (20:1 petroleum ether/ethyl acetate) afforded **4ra** as a colorless liquid (33.1 mg, 62% yield).

$^1\text{H NMR}$  (400 MHz,  $\text{CDCl}_3$ )  $\delta$  7.54 – 7.46 (m, 2H), 7.08 – 7.00 (m, 2H), 3.15 (td,  $J = 10.2, 3.9$  Hz, 1H), 2.91 (td,  $J = 10.2, 3.9$  Hz, 1H), 2.49 – 2.38 (m, 1H), 2.22 – 2.10 (m, 1H), 1.76 (ddt,  $J = 10.7, 7.4, 2.4$  Hz, 3H), 1.49 – 1.27 (m, 3H).

$^{13}\text{C NMR}$  (100 MHz,  $\text{CDCl}_3$ )  $\delta$  163.28 (d,  $^1J_{\text{FC}} = 249.5$  Hz), 136.98 (d,  $^3J_{\text{FC}} = 8.4$  Hz), 126.81 (d,  $^4J_{\text{FC}} = 3.2$  Hz), 116.47 (d,  $^2J_{\text{FC}} = 21.8$  Hz), 111.52, 52.26, 52.14, 33.90, 33.69, 25.26.

**HRMS**  $m/z$  (ESI) calcd. for  $\text{C}_{13}\text{H}_{15}\text{FNS}_2$  ( $[\text{M}+\text{H}]^+$ ): 268.0630, Found: 268.0643.

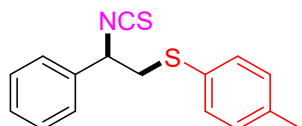

**(4-fluorophenyl)(2-isothiocyanato-2-phenylpropyl)sulfane (5)<sup>1</sup>.**

Purified by column chromatography on silica gel (20:1 petroleum ether/ethyl acetate) afforded **5** as a colorless liquid (54.7 mg, 96% yield).

<sup>1</sup>H NMR (400 MHz, CDCl<sub>3</sub>) δ 7.41 – 7.32 (m, 5H), 7.30 – 7.25 (m, 2H), 7.16 (d, *J* = 7.9 Hz, 2H), 4.80 (dd, *J* = 7.9, 5.9 Hz, 1H), 3.34 – 3.22 (m, 2H), 2.36 (s, 3H).

HRMS *m/z* (ESI) calcd. for C<sub>16</sub>H<sub>16</sub>NS<sub>2</sub> ([M+H]<sup>+</sup>): 286.0724, Found: 286.0734.

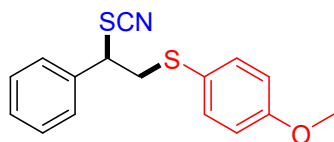

**(4-methoxyphenyl)(2-phenyl-2-thiocyanatoethyl)sulfane (6).**

Purified by column chromatography on silica gel (20:1 petroleum ether/ethyl acetate) afforded **6** as a colorless liquid (45.8 mg, 76% yield).

<sup>1</sup>H NMR (400 MHz, CDCl<sub>3</sub>) δ 7.32 (m, *J* = 16.3, 6.3, 5.1, 3.2 Hz, 7H), 7.01 – 6.93 (m, 2H), 4.25 (dd, *J* = 8.1, 5.0 Hz, 1H), 3.30 – 3.25 (m, 1H), 3.24 (d, *J* = 2.2 Hz, 3H), 3.07 (dd, *J* = 13.3, 5.0 Hz, 1H).

<sup>13</sup>C NMR (100 MHz, CDCl<sub>3</sub>) δ 159.90, 136.54, 134.68, 129.37, 129.18, 127.90, 123.65, 115.02, 111.34, 55.42, 52.50, 41.45.

HRMS *m/z* (ESI) calcd. for C<sub>16</sub>H<sub>16</sub>NOS<sub>2</sub> ([M+H]<sup>+</sup>): 302.0673, Found: 302.0678.

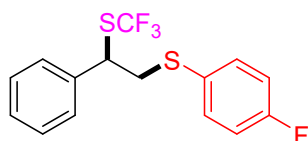

**(4-fluorophenyl)(2-phenyl-2-((trifluoromethyl)thio)ethyl)sulfane (7).**

Purified by column chromatography on silica gel (20:1 petroleum ether/ethyl acetate) afforded **7** as a colorless liquid (47.8 mg, 72% yield).

<sup>1</sup>H NMR (400 MHz, CDCl<sub>3</sub>) δ 7.32 – 7.26 (m, 3H), 7.22 (ddd, *J* = 11.3, 5.7, 2.9 Hz, 2H), 7.12 – 7.07 (m, 1H), 7.06 – 7.00 (m, 1H), 6.95 (t, *J* = 8.6 Hz, 2H), 3.59 – 3.42 (m, 2H), 3.28 – 3.19 (m, 1H).

<sup>13</sup>C NMR (100 MHz, CDCl<sub>3</sub>) δ 162.95 (d, <sup>4</sup>*J*<sub>C-F</sub> = 2.1 Hz), 161.31 (d, <sup>4</sup>*J*<sub>C-F</sub> = 2.1 Hz), 138.40 (d, <sup>3</sup>*J*<sub>C-F</sub> = 13.1 Hz), 133.36 (q, <sup>4</sup>*J*<sub>C-F</sub> = 8.1, 4.8 Hz), 130.29 (q, <sup>1</sup>*J*<sub>C-F</sub> = 210.3 Hz), 128.76 (d, <sup>4</sup>*J*<sub>C-F</sub> = 4.9 Hz), 128.34 (d, <sup>3</sup>*J*<sub>C-F</sub> = 14.6 Hz), 128.31 (d, <sup>3</sup>*J*<sub>C-F</sub> = 11.9 Hz), 116.17 (dd, <sup>2</sup>*J*<sub>C-F</sub> = 21.7 Hz), 54.18 (d, <sup>4</sup>*J*<sub>C-F</sub> = 15.7 Hz), 39.97 (d, <sup>3</sup>*J*<sub>C-F</sub> = 21.6 Hz).

HRMS *m/z* (ESI) calcd. for C<sub>15</sub>H<sub>13</sub>F<sub>4</sub>S<sub>2</sub> ([M+H]<sup>+</sup>): 333.0395, Found: 333.0402.

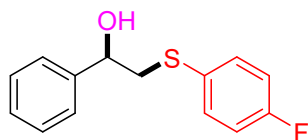

**2-((4-fluorophenyl)thio)-1-phenylethan-1-ol (C)<sup>2</sup>.**

Purified by column chromatography on silica gel (20:1 petroleum ether/ethyl acetate) afforded **C** as a colorless liquid (20.9 mg, 42% yield).

<sup>1</sup>H NMR (400 MHz, CDCl<sub>3</sub>) δ 7.47 – 7.39 (m, 2H), 7.36 – 7.27 (m, 5H), 7.08 – 6.97 (m, 2H), 4.69 (dt, *J* = 9.3, 3.2 Hz, 1H), 3.25 (dd, *J* = 13.8, 3.6 Hz, 1H), 3.07 (dd, *J* = 13.8, 9.3 Hz, 1H),

2.81 (d,  $J = 2.5$  Hz, 1H), 1.57 (s, 1H).

**HRMS**  $m/z$  (ESI) calcd. for  $C_{14}H_{14}FOS$  ( $[M+H]^+$ ): 249.0749, Found: 249.0754.

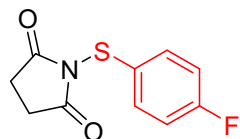

**1-((4-fluorophenyl)thio)pyrrolidine-2,5-dione (F)**<sup>3</sup>.

Purified by column chromatography on silica gel (20:1 petroleum ether/ethyl acetate) afforded **F** as a colorless liquid (24.3 mg, 54% yield).

**<sup>1</sup>H NMR** (400 MHz,  $CDCl_3$ )  $\delta$  7.75 – 7.67 (m, 2H), 7.05 – 6.96 (m, 2H), 2.78 (s, 4H).

**HRMS**  $m/z$  (ESI) calcd. for  $C_{10}H_9FNO_2S$  ( $[M+H]^+$ ): 226.0338, Found: 226.0354.

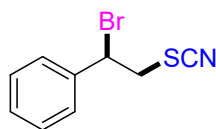

**(1-bromo-2-thiocyanatoethyl)benzene (I)**<sup>4</sup>.

Purified by column chromatography on silica gel (20:1 petroleum ether/ethyl acetate) afforded **I** as a colorless liquid (19.8 mg, 41% yield).

**<sup>1</sup>H NMR** (400 MHz,  $CDCl_3$ )  $\delta$  7.43 – 7.33 (m, 5H), 5.15 (dd,  $J = 10.6, 5.5$  Hz, 1H), 4.17 – 3.96 (m, 2H).

**HRMS**  $m/z$  (ESI) calcd. for  $C_9H_9BrNS$  ( $[M+H]^+$ ): 241.9639, Found: 241.9645.

## References

1. Chao Xu, Ze He, Xiaokang Kang and Qingle Zeng, *Green Chemistry*, **2021**, 23, 7544–7548.
2. Jiawei Huang, Xiaoman Li, Liang Xu, and Yu Wei, *The Journal of Organic Chemistry*, **2023**, 88, 3054–3067.
3. Hua Tian, Jipan Yu, Haijun Yang, Changjin Zhu, and Hua Fua, *Advanced Synthesis & Catalysis* **2016**, 358, 1794–1800.
4. Cambie, Richard C, Larsen, David S, Rutledge, Peter S, Woodgate, Paul D, *Organic and Bio-Organic Chemistry*, **1981**, 1, 58-63.

## 5. NMR Spectra of Products

### (4-fluorophenyl)(2-phenyl-2-thiocyanatoethyl)sulfane (4aa)

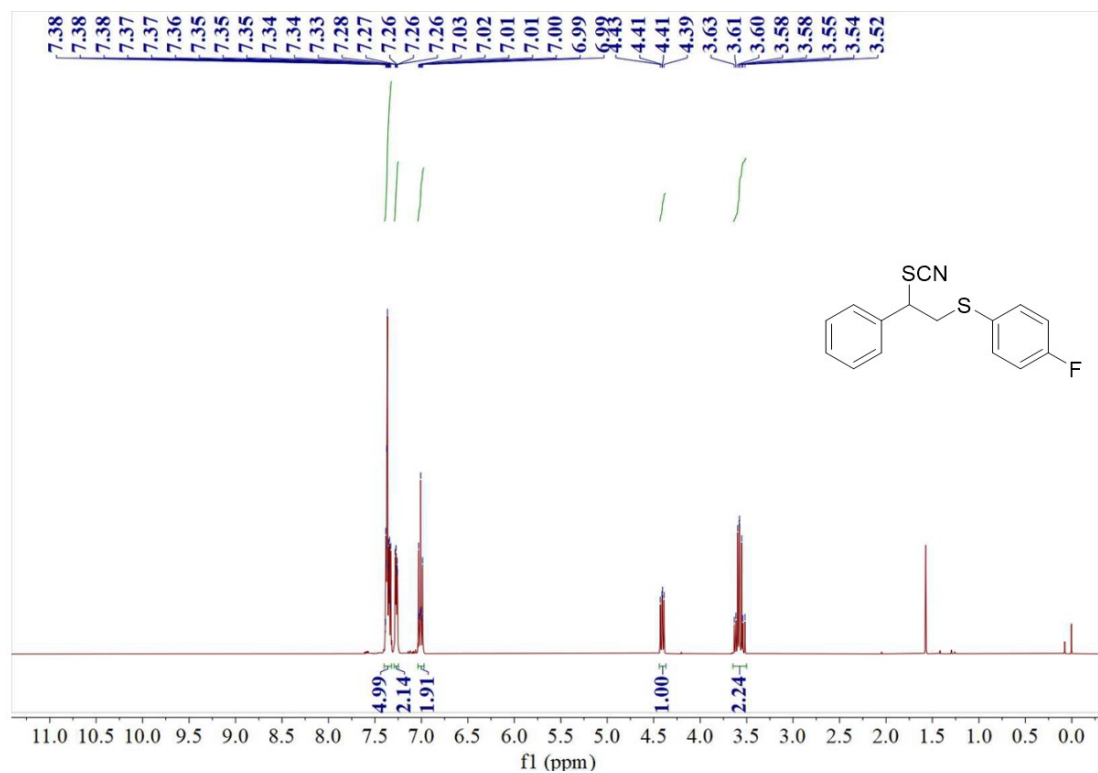

<sup>1</sup>H NMR (400 MHz, CDCl<sub>3</sub>) spectrum of 4aa

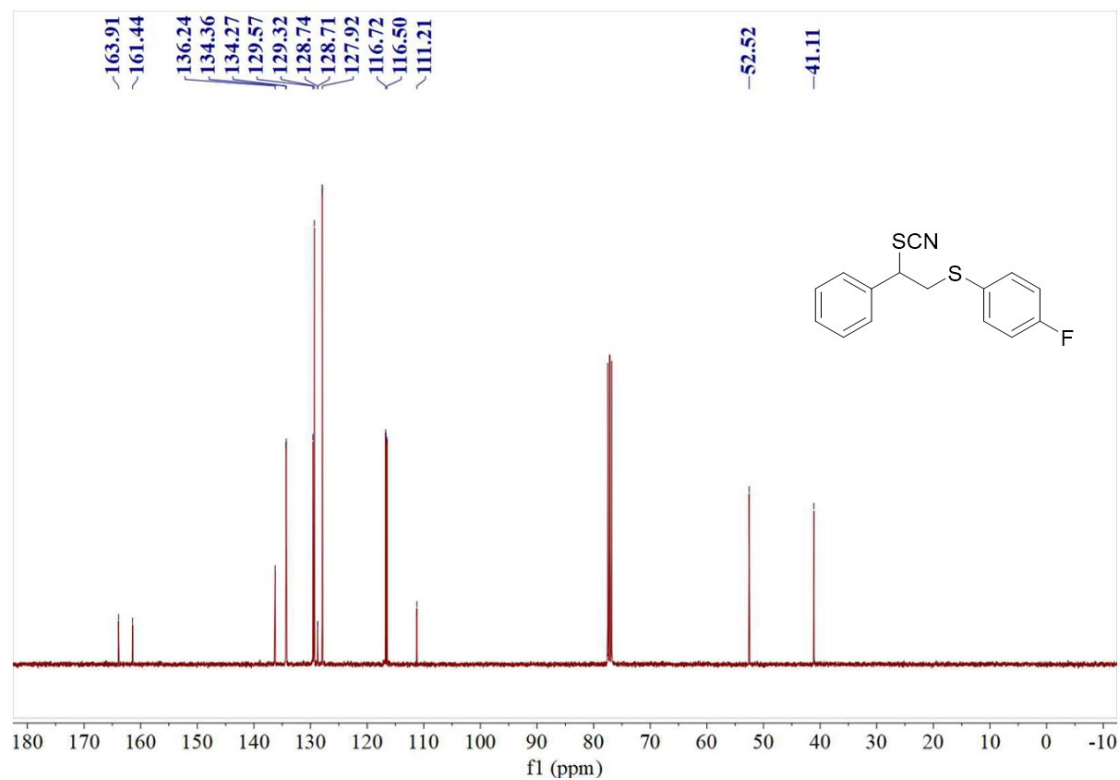

<sup>13</sup>C NMR (100 MHz, CDCl<sub>3</sub>) spectrum of 4aa

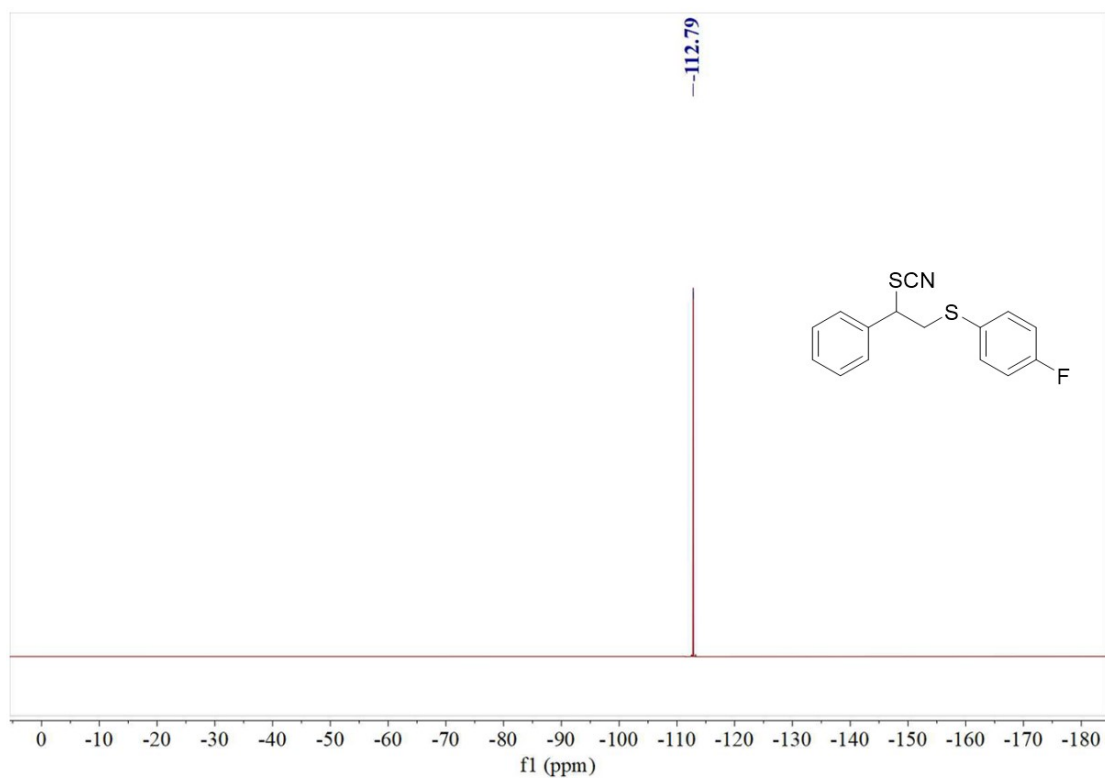

**<sup>19</sup>F NMR (375 MHz, CDCl<sub>3</sub>) spectrum of 4aa**

**(3-fluorophenyl)(2-phenyl-2-thiocyanatoethyl)sulfane(4ab)**

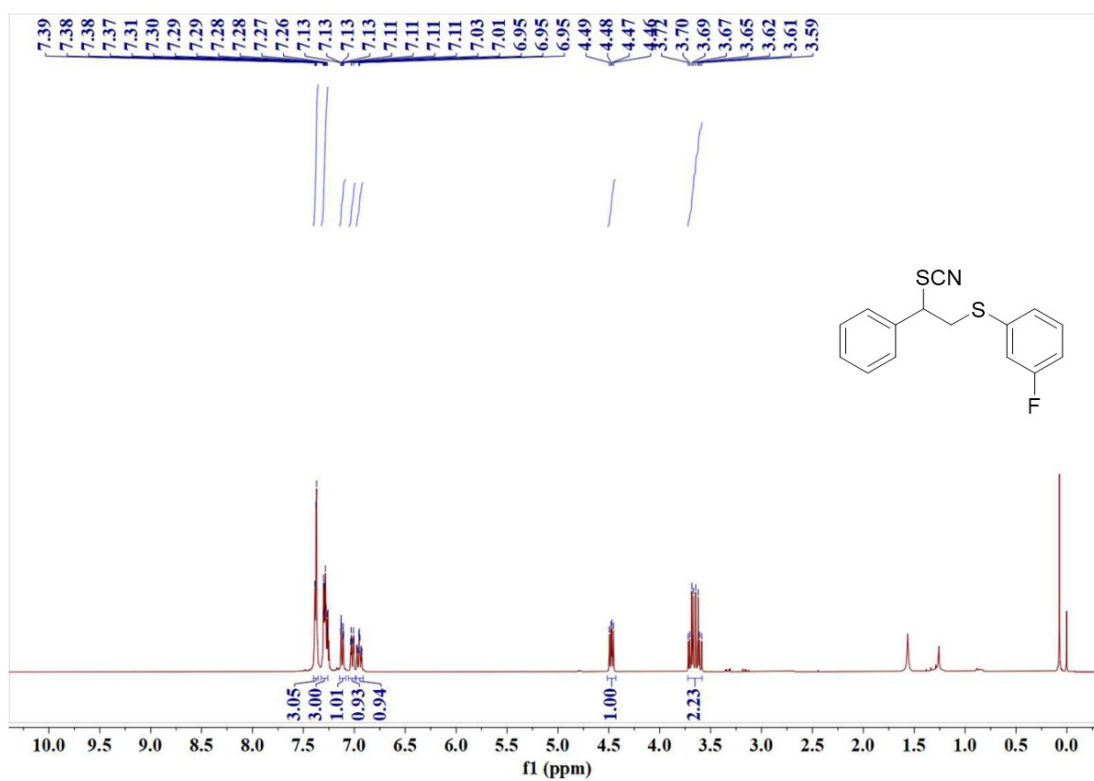

**<sup>1</sup>H NMR (400 MHz, CDCl<sub>3</sub>) spectrum of 4ab**

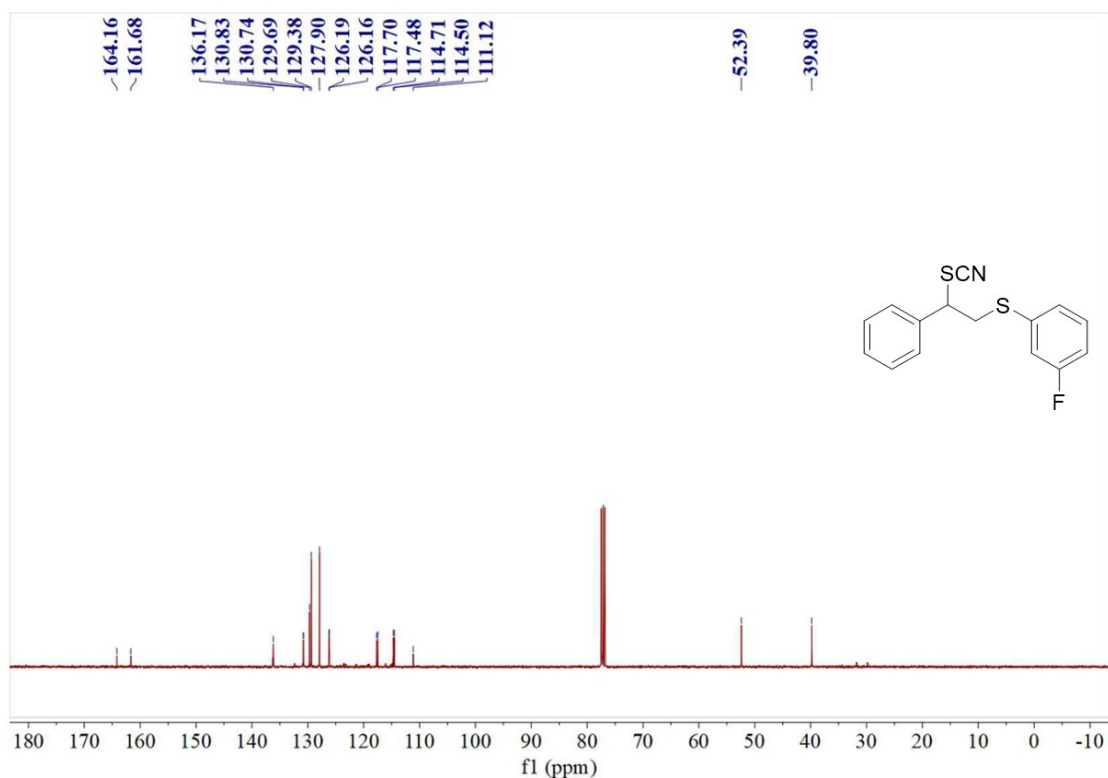

<sup>13</sup>C NMR (100 MHz, CDCl<sub>3</sub>) spectrum of 4ab

(4-fluorophenyl)(2-(4-fluorophenyl)-2-thiocyanatoethyl)sulfane (4ac)

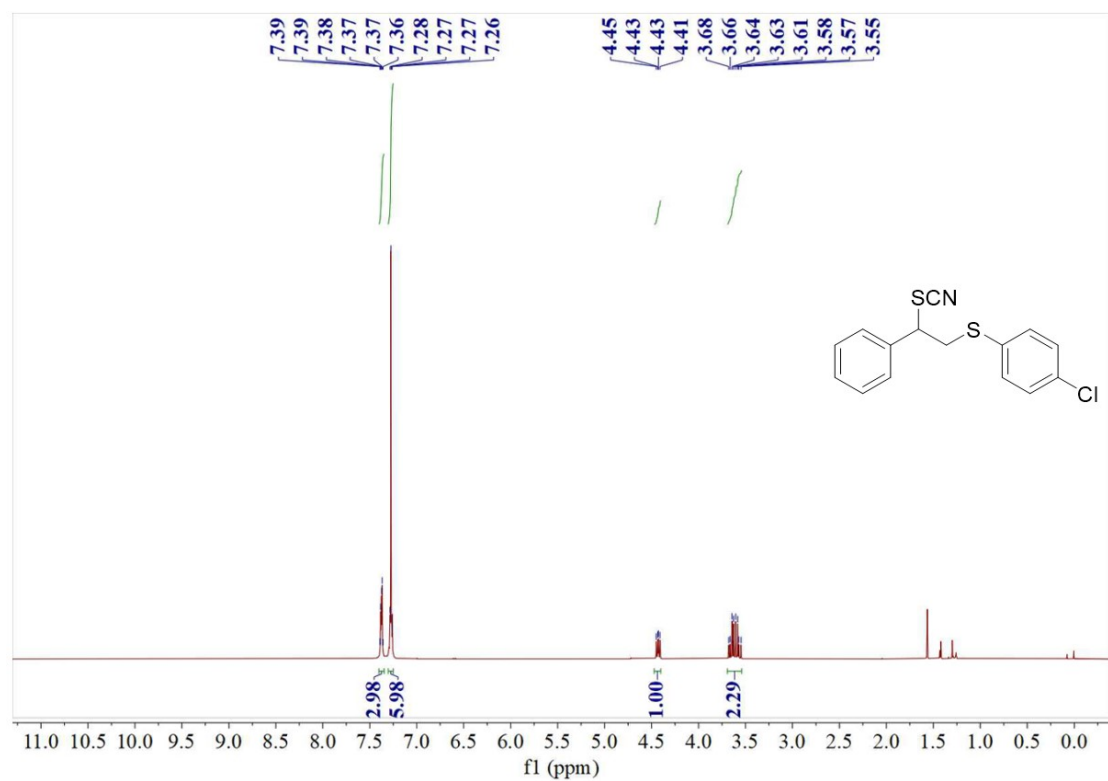

<sup>1</sup>H NMR (400 MHz, CDCl<sub>3</sub>) spectrum of 4ac



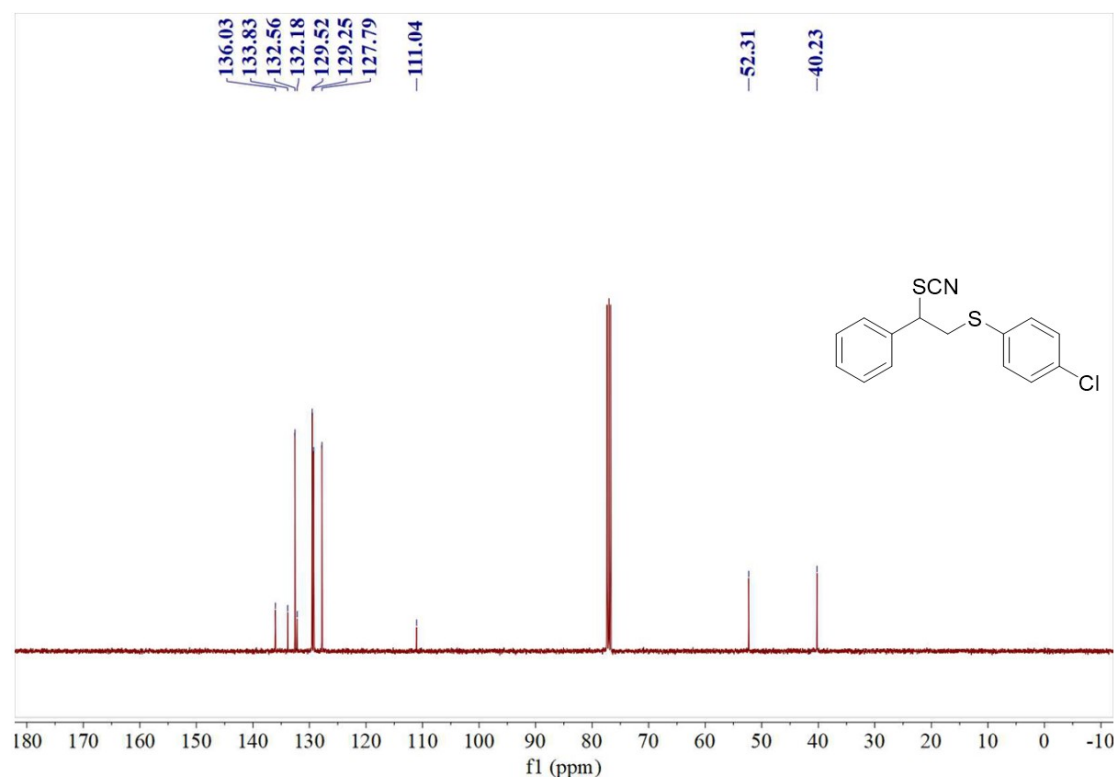

<sup>13</sup>C NMR (100 MHz, CDCl<sub>3</sub>) spectrum of 4ac

(2-chlorophenyl)(2-phenyl-2-thiocyanatoethyl)sulfane (4ad)

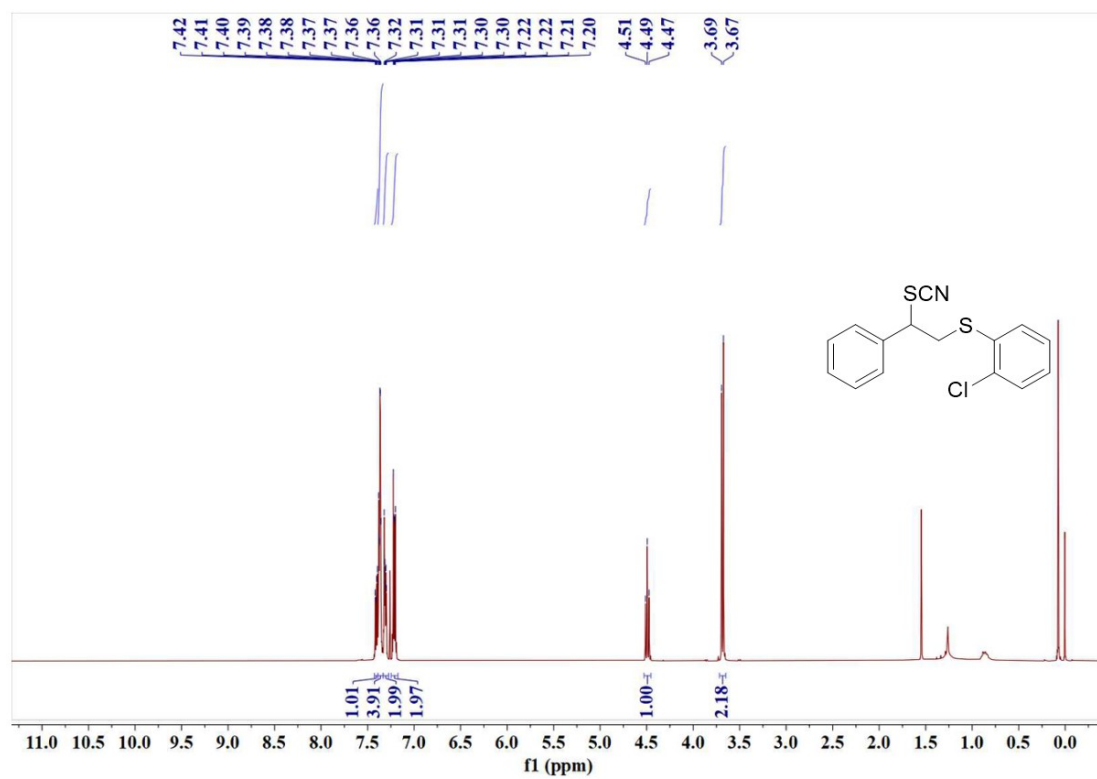

<sup>1</sup>H NMR (400 MHz, CDCl<sub>3</sub>) spectrum of 4ad

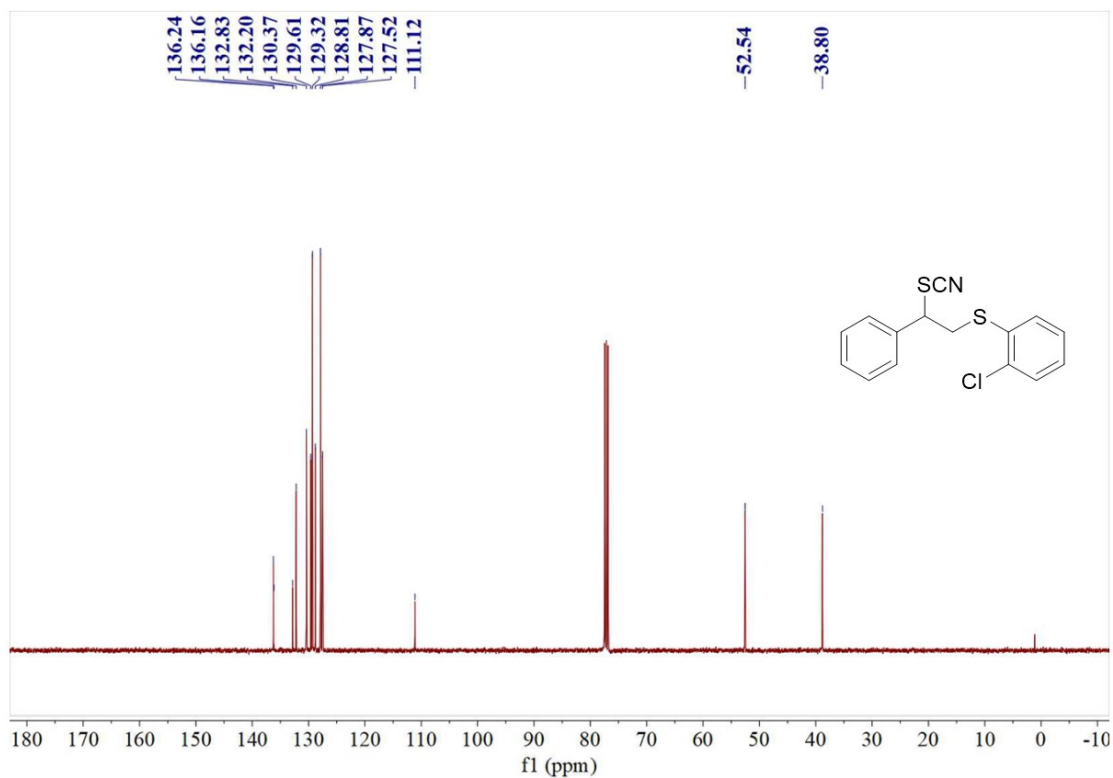

<sup>13</sup>C NMR (100 MHz, CDCl<sub>3</sub>) spectrum of 4ad

(4-bromophenyl)(2-phenyl-2-thiocyanatoethyl)sulfane (4ae)

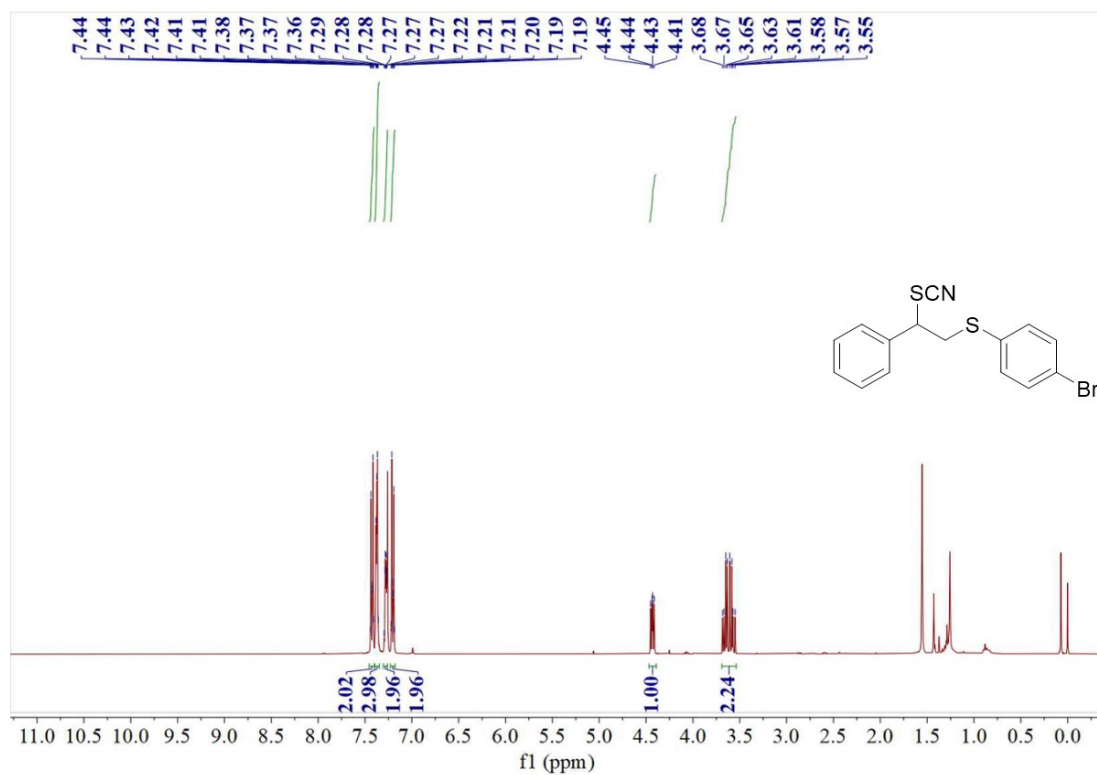

<sup>1</sup>H NMR (400 MHz, CDCl<sub>3</sub>) spectrum of 4ae

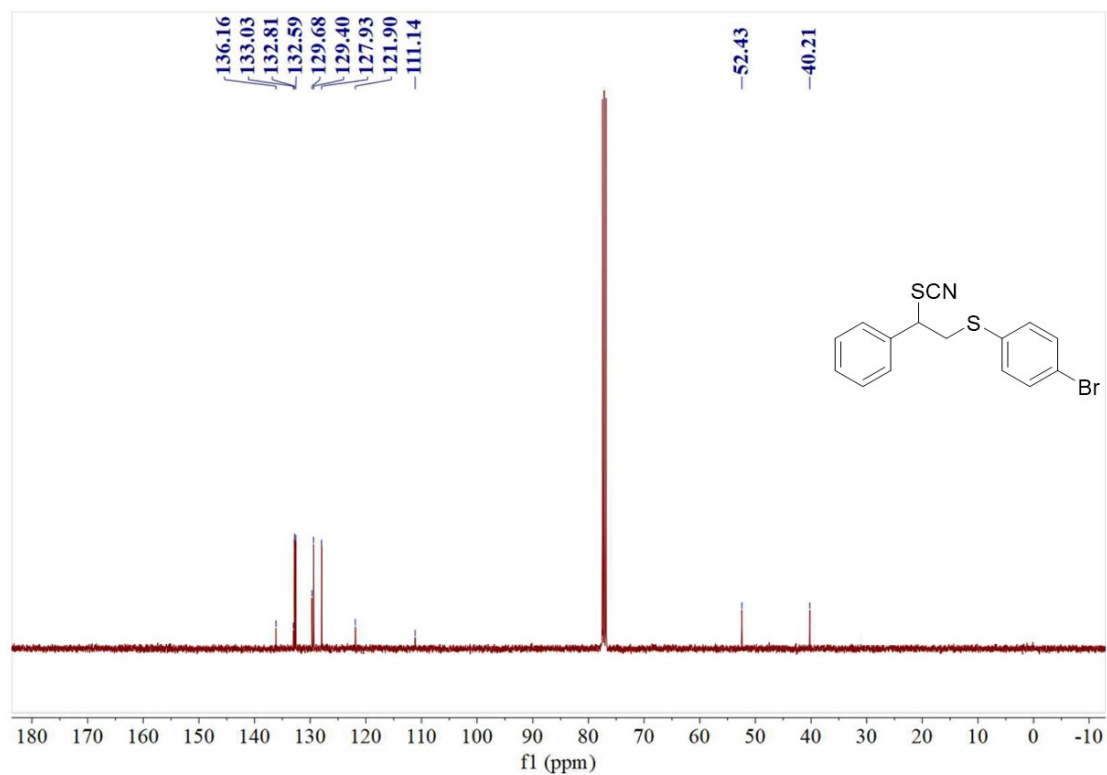

**<sup>13</sup>C NMR (100 MHz, CDCl<sub>3</sub>) spectrum of 4ae**

**(2-phenyl-2-thiocyanatoethyl)(p-tolyl)sulfane (4af)**

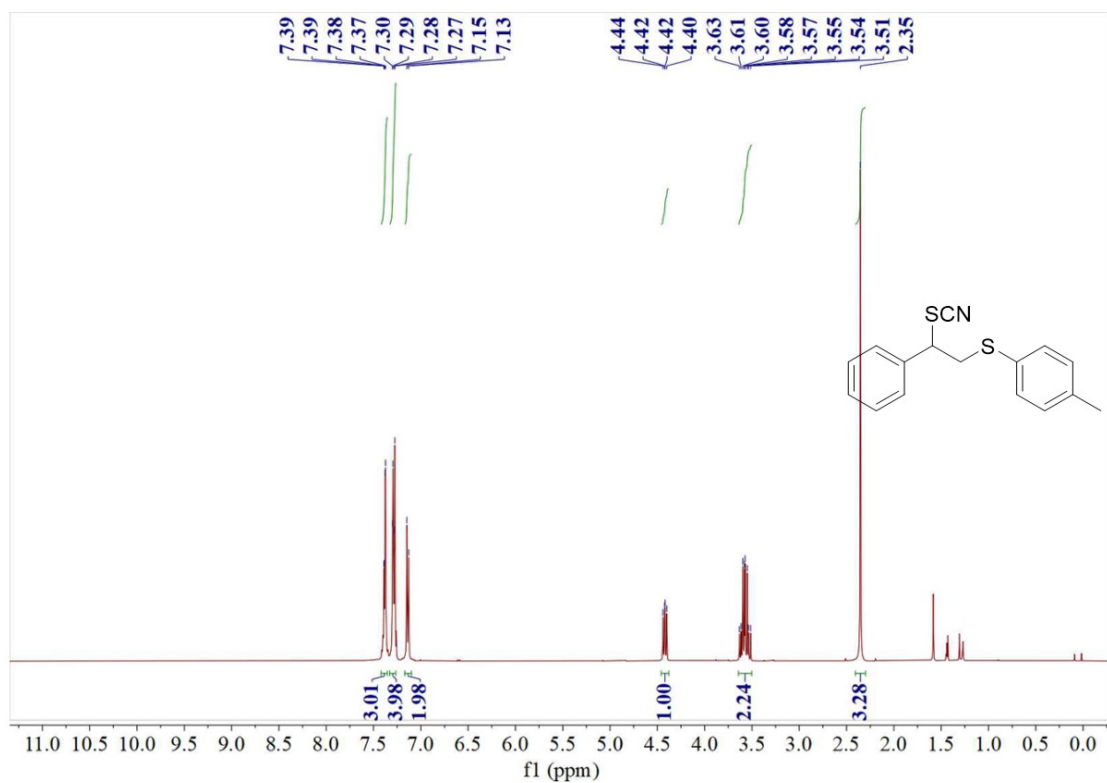

**<sup>1</sup>H NMR (400 MHz, CDCl<sub>3</sub>) spectrum of 4af**

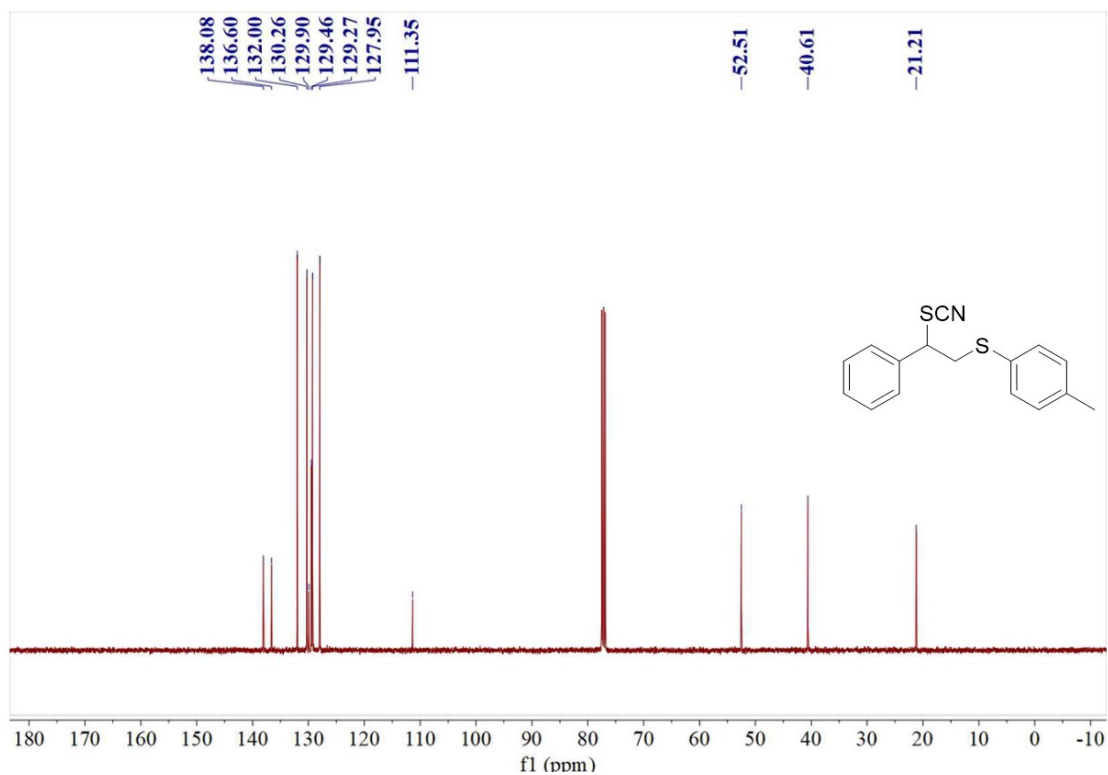

**<sup>13</sup>C NMR (100 MHz, CDCl<sub>3</sub>) spectrum of 4af**

**(2-(tert-butyl)phenyl)(2-phenyl-2-thiocyanatoethyl)sulfane (4ag)**

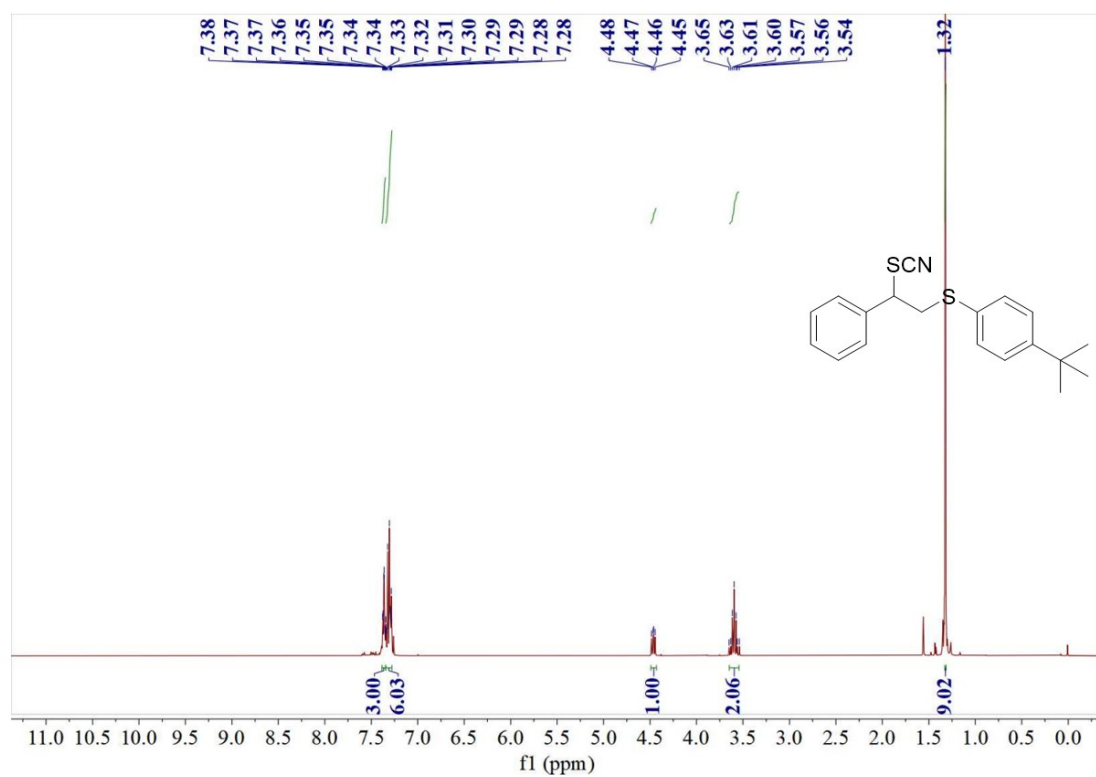

**<sup>1</sup>H NMR (400 MHz, CDCl<sub>3</sub>) spectrum of 4ag**

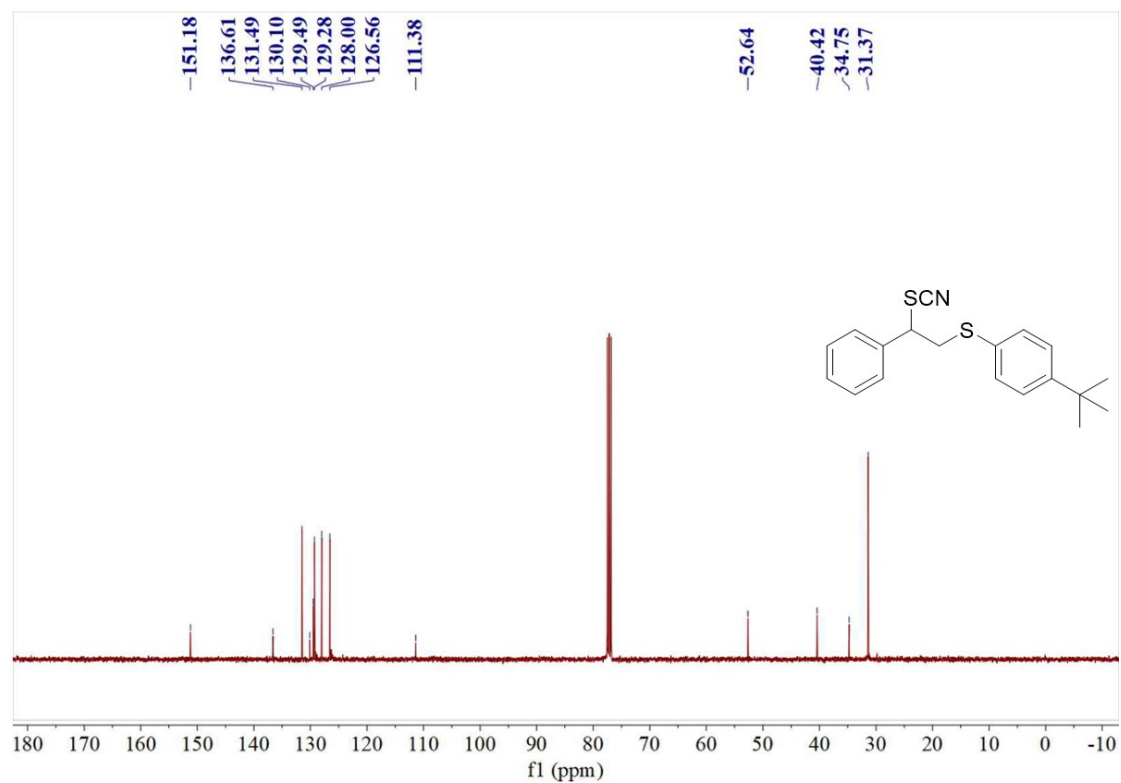

<sup>13</sup>C NMR (100 MHz, CDCl<sub>3</sub>) spectrum of 4ag

(2-phenyl-2-thiocyanatoethyl)(4-(trifluoromethyl)phenyl)sulfane (4ah)

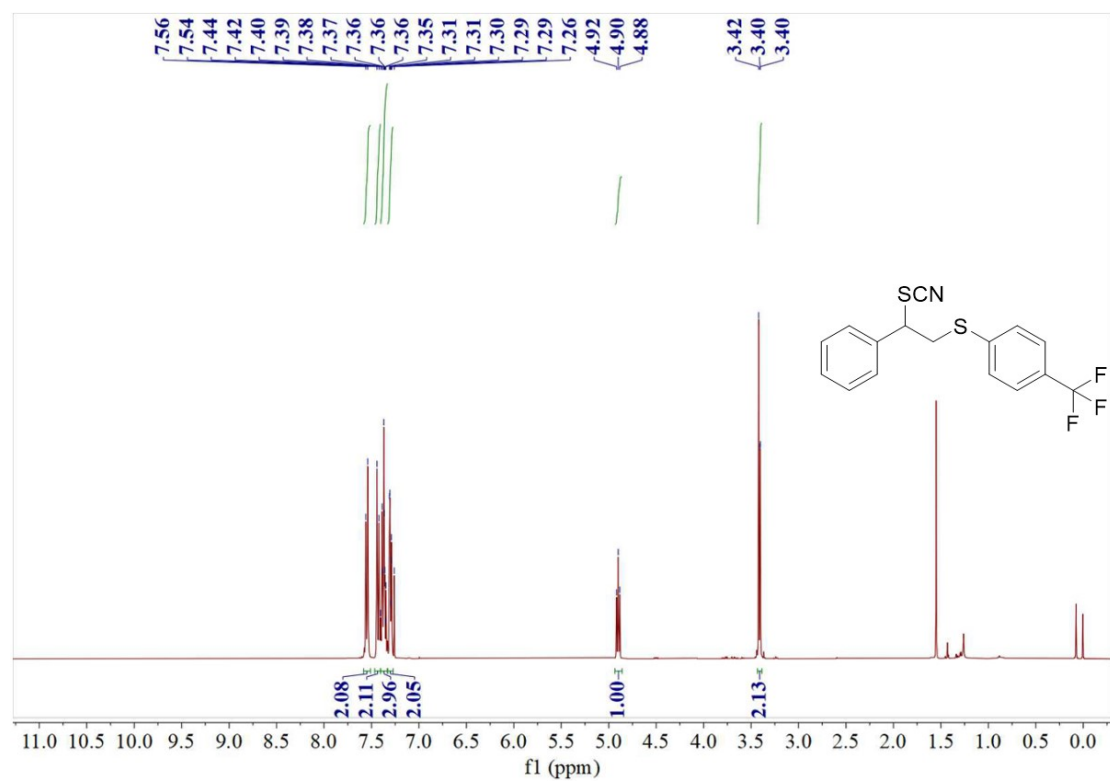

<sup>1</sup>H NMR (400 MHz, CDCl<sub>3</sub>) spectrum of 4ah

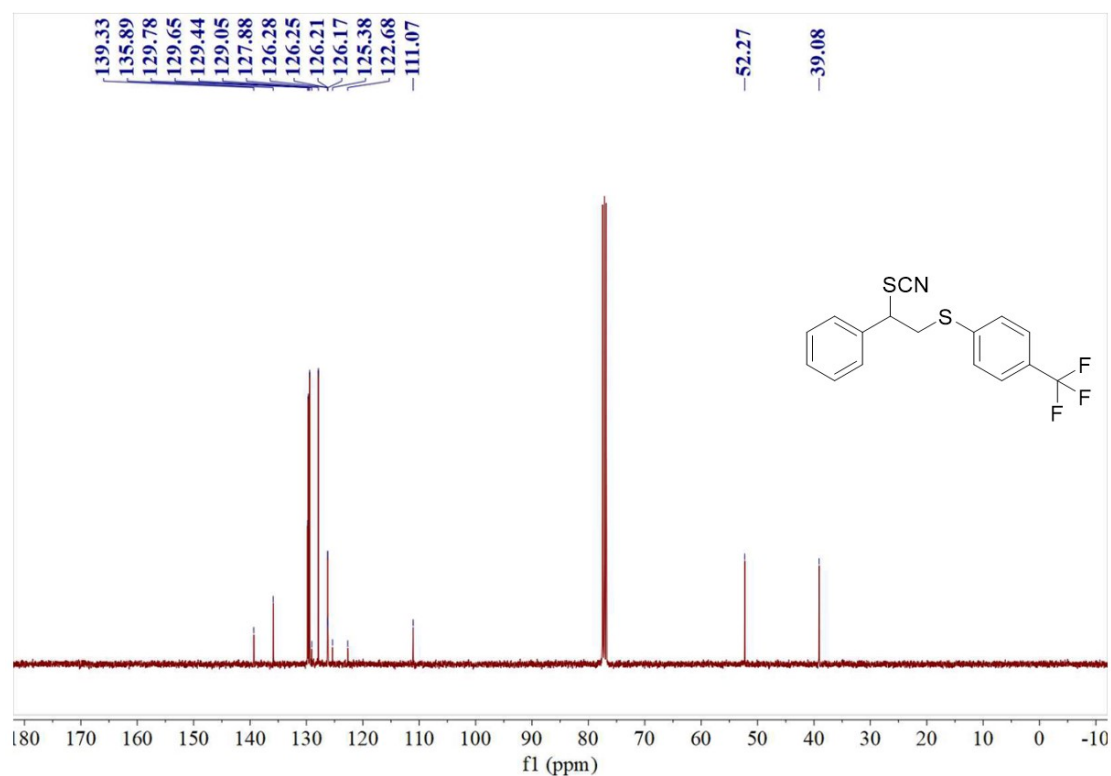

<sup>13</sup>C NMR (100 MHz, CDCl<sub>3</sub>) spectrum of 4ah

methyl 2-((2-phenyl-2-thiocyanatoethyl)thio)benzoate (4ai)

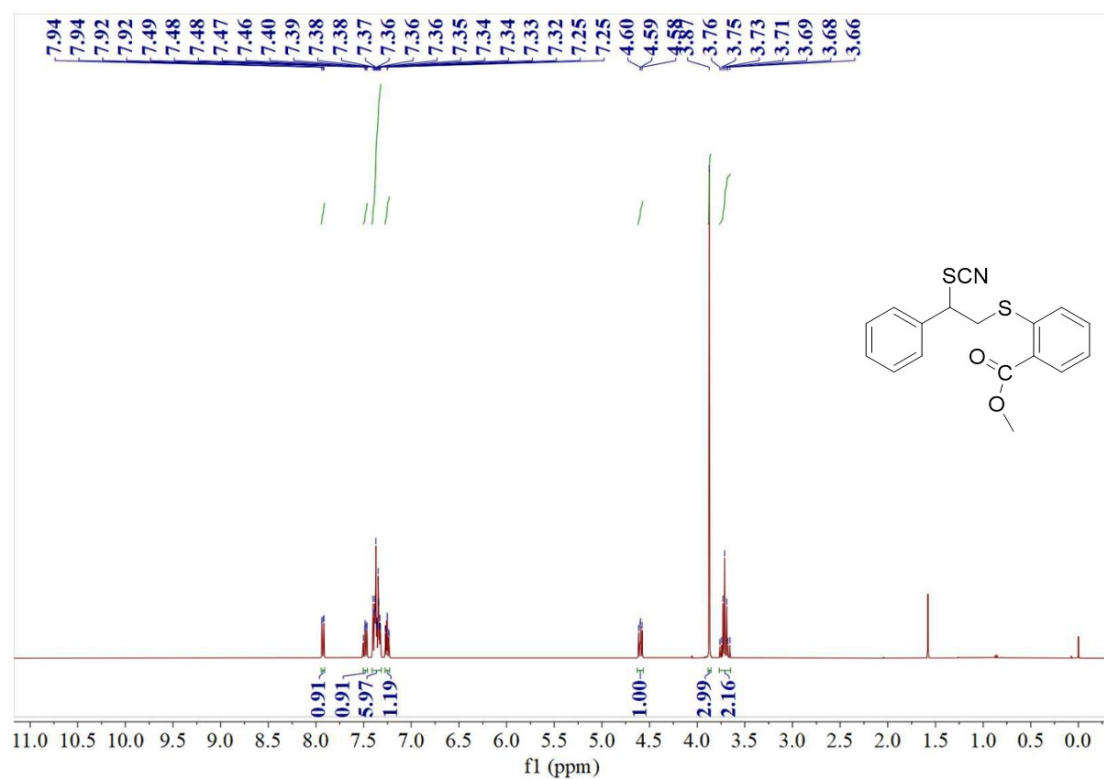

<sup>1</sup>H NMR (400 MHz, CDCl<sub>3</sub>) spectrum of 4ai

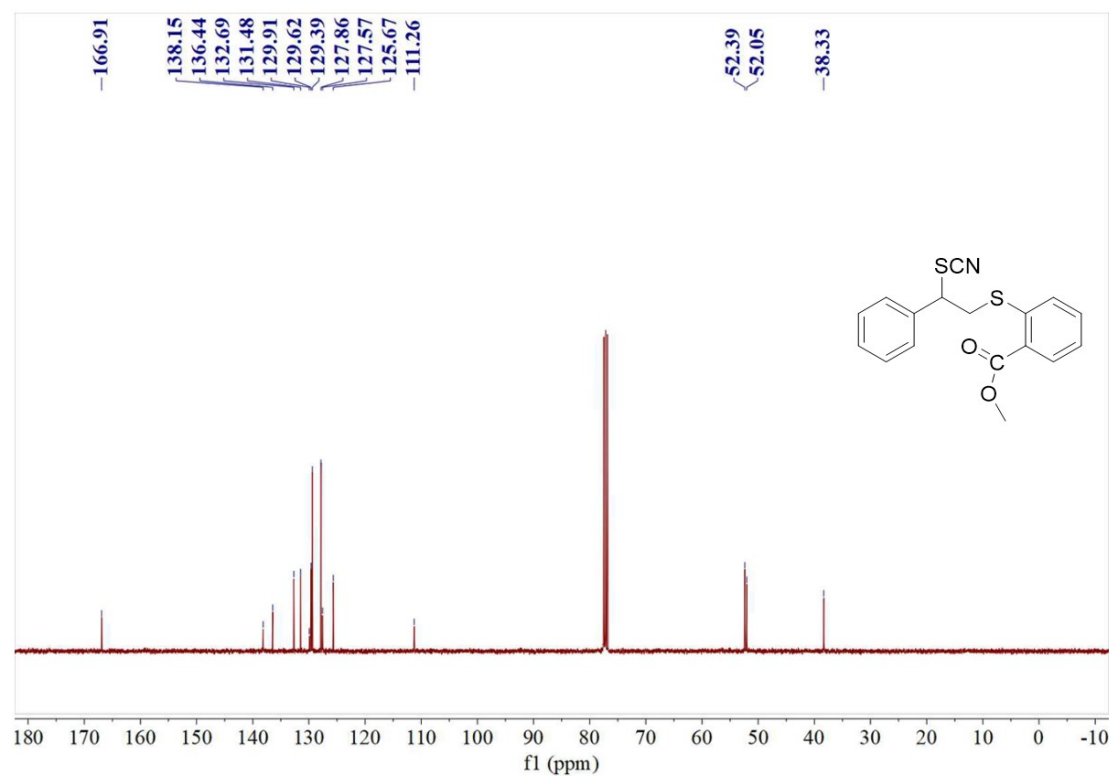

<sup>13</sup>C NMR (100 MHz, CDCl<sub>3</sub>) spectrum of 4ai

(3,5-dimethylphenyl)(2-phenyl-2-thiocyanatoethyl)sulfane (4aj)

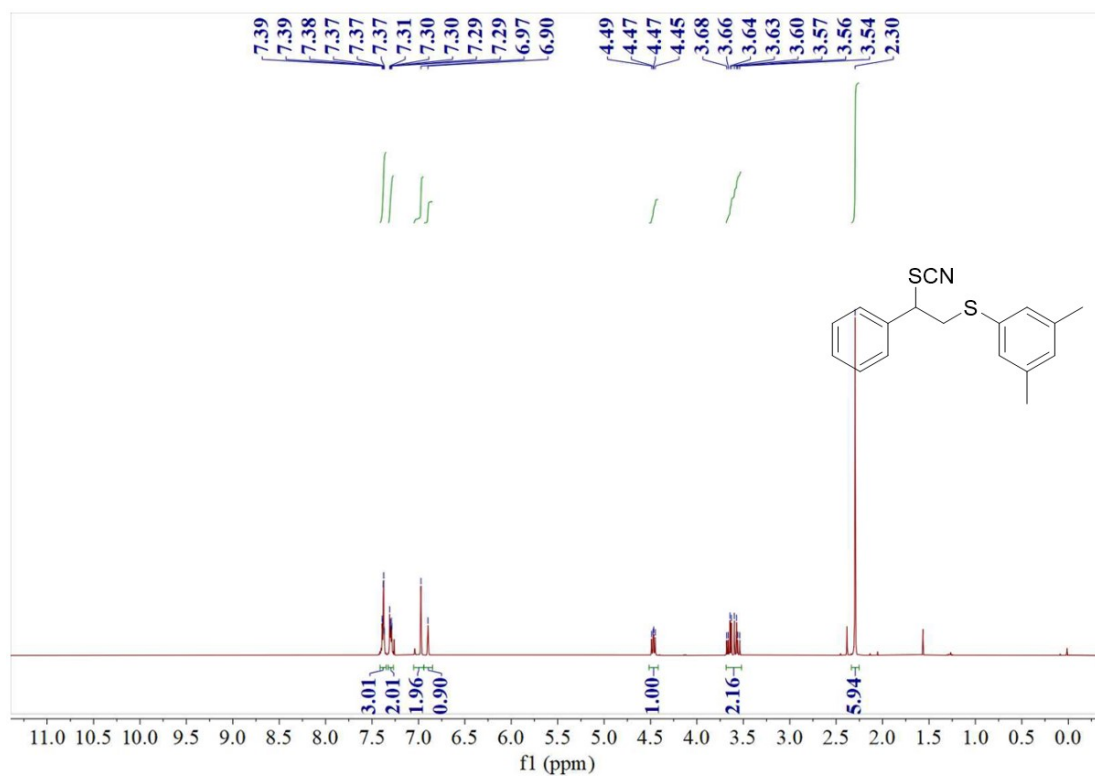

<sup>1</sup>H NMR (400 MHz, CDCl<sub>3</sub>) spectrum of 4aj

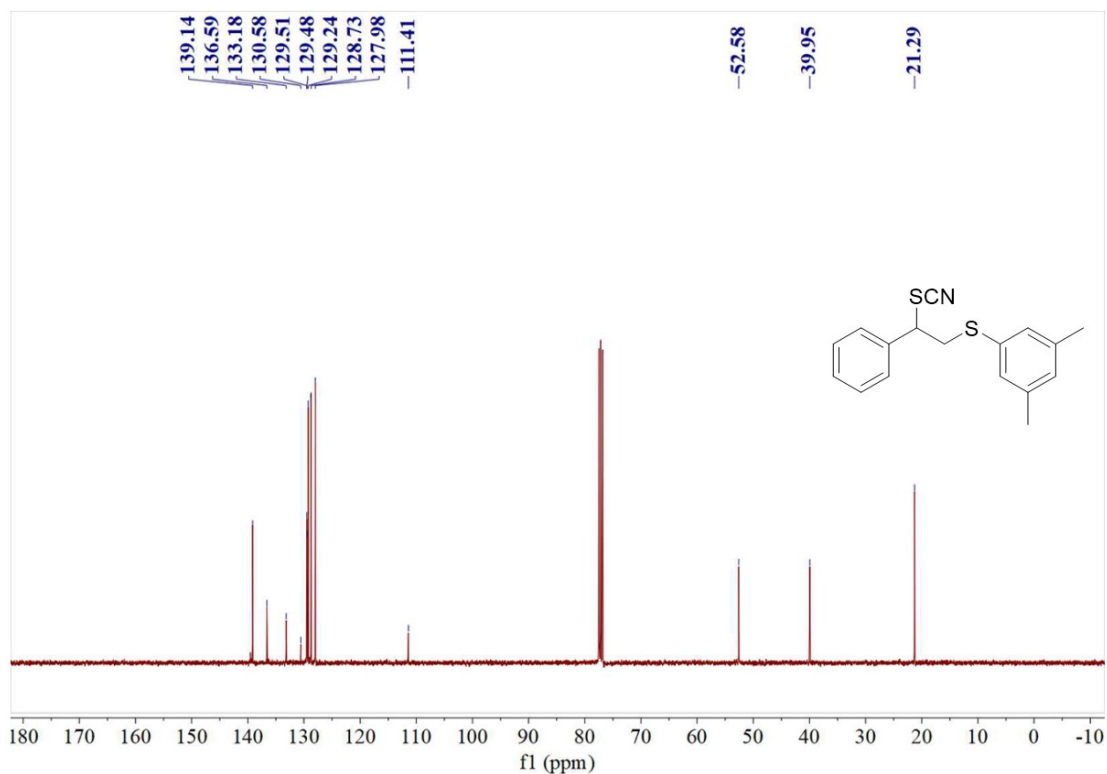

<sup>13</sup>C NMR (100 MHz, CDCl<sub>3</sub>) spectrum of 4aj

(2,4-dimethylphenyl)(2-phenyl-2-thiocyanatoethyl)sulfane (4ak)

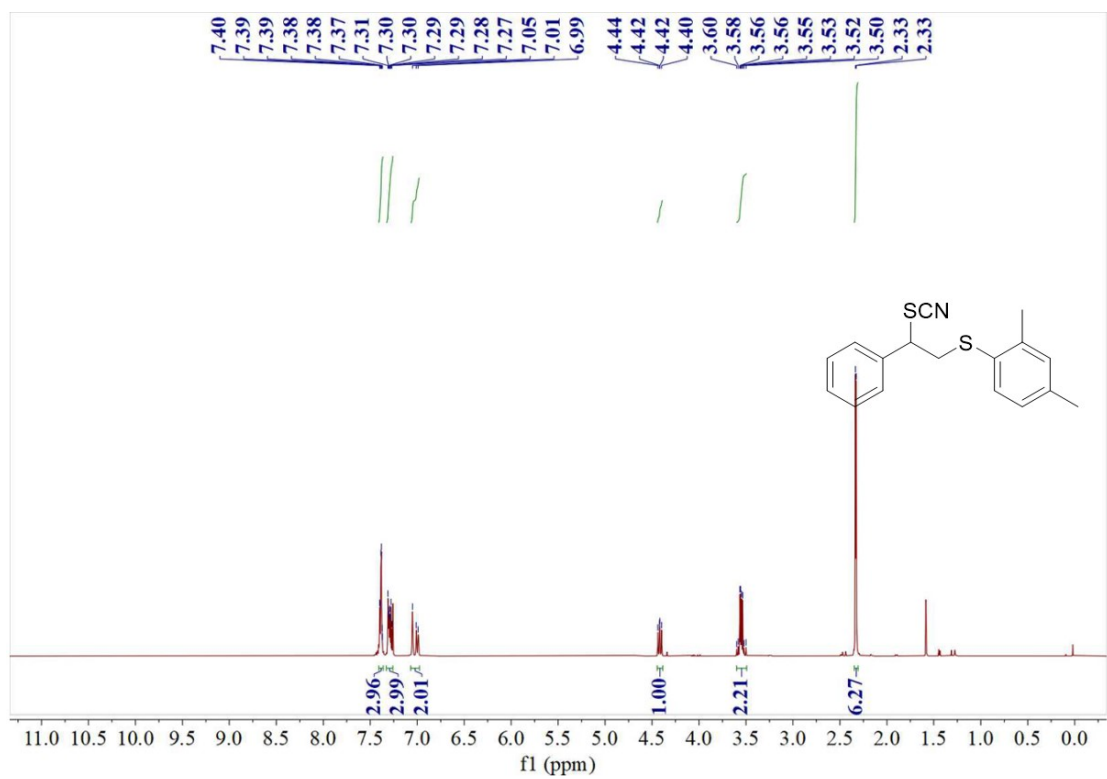

<sup>1</sup>H NMR (400 MHz, CDCl<sub>3</sub>) spectrum of 4ak



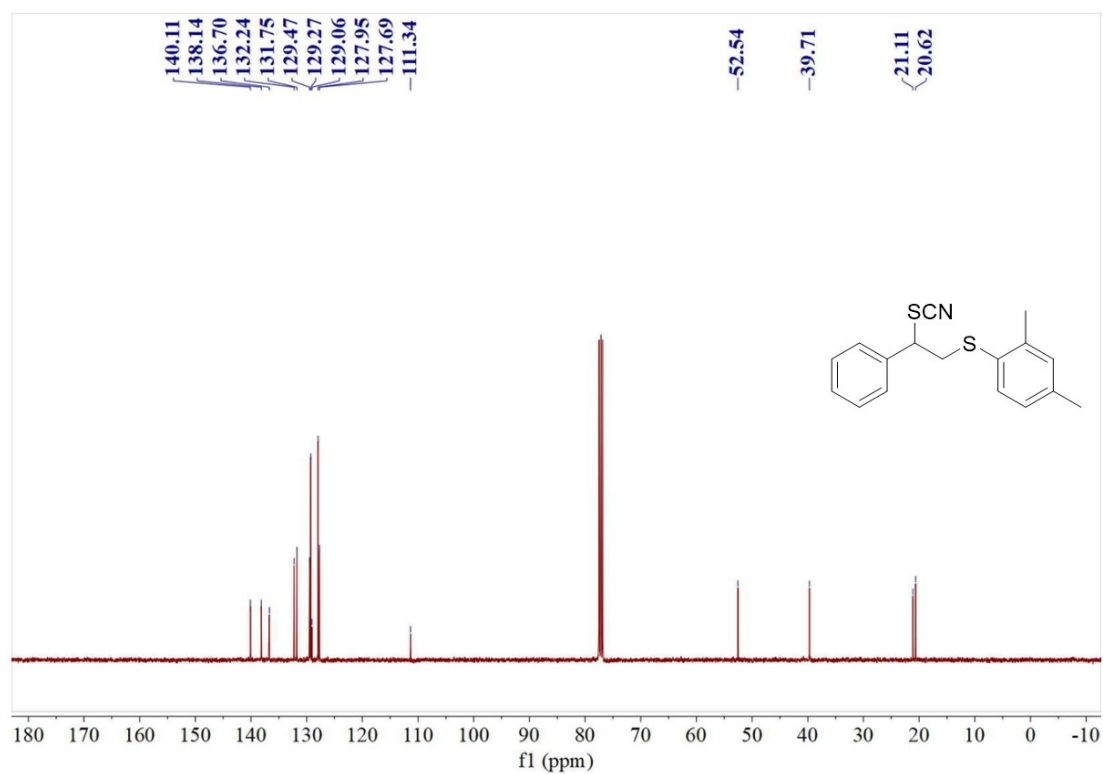

<sup>13</sup>C NMR (100 MHz, CDCl<sub>3</sub>) spectrum of 4a

(2,6-dimethylphenyl)(2-phenyl-2-thiocyanatoethyl)sulfane (4a)

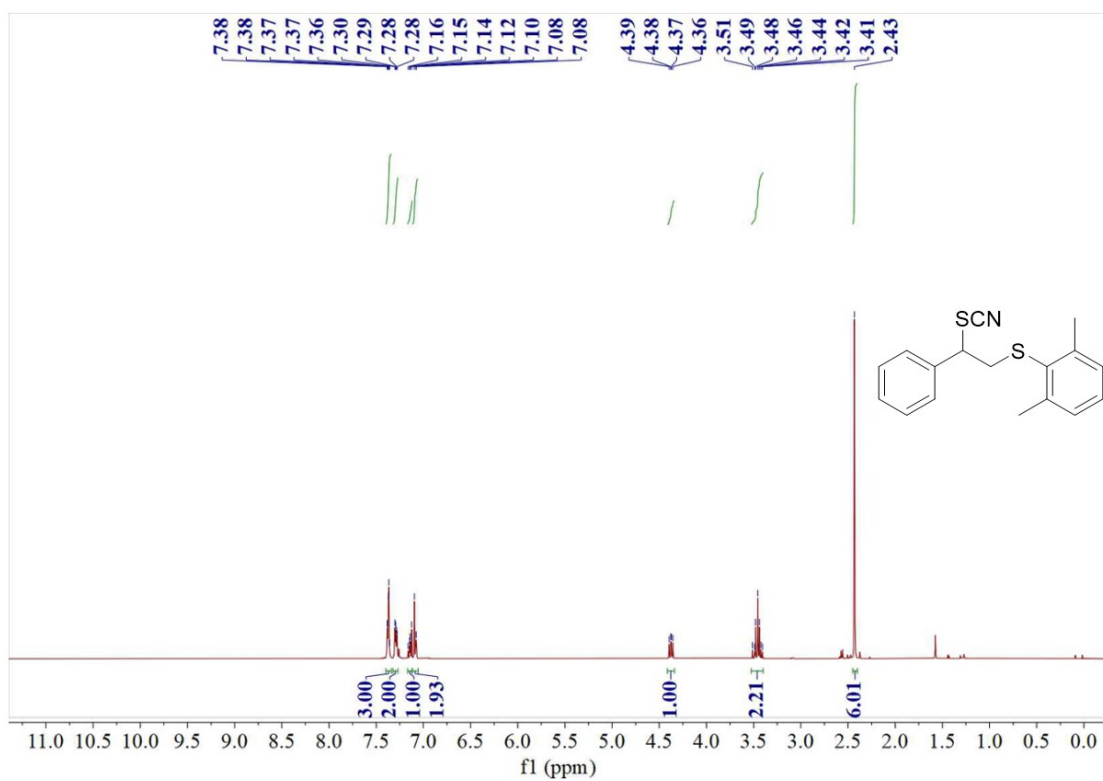

<sup>1</sup>H NMR (400 MHz, CDCl<sub>3</sub>) spectrum of 4a

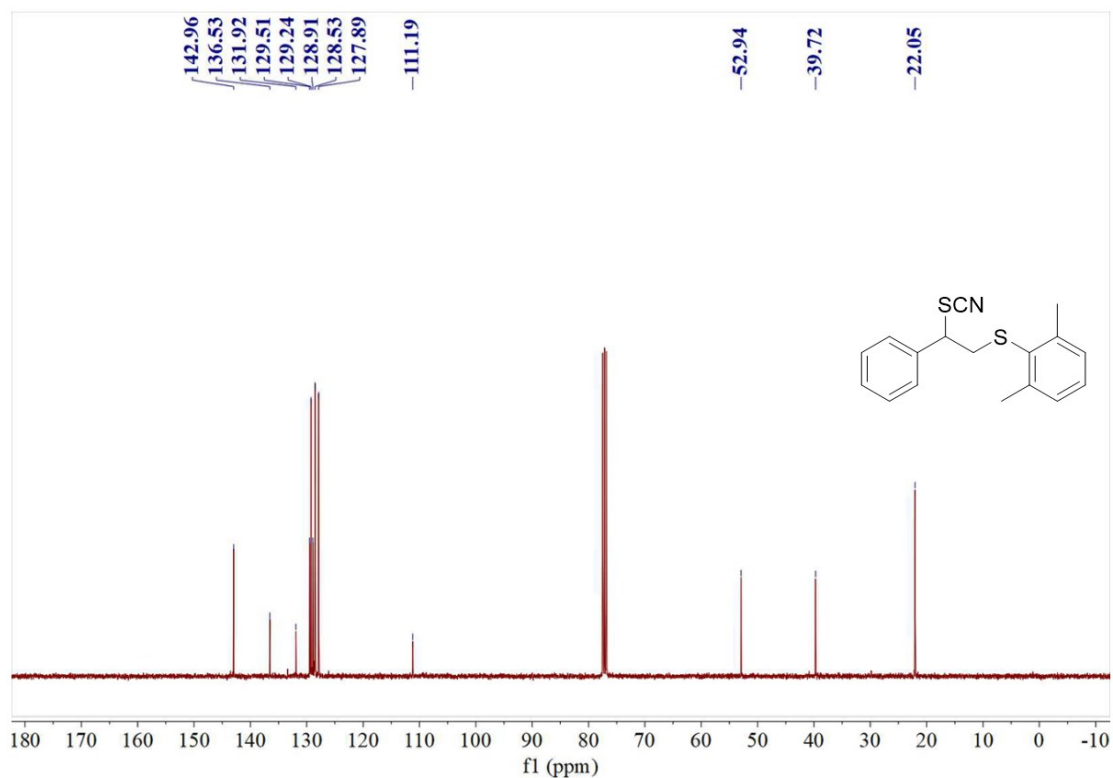

<sup>13</sup>C NMR (100 MHz, CDCl<sub>3</sub>) spectrum of 4a

(3,4-dichlorophenyl)(2-phenyl-2-thiocyanatoethyl)sulfane (4am)

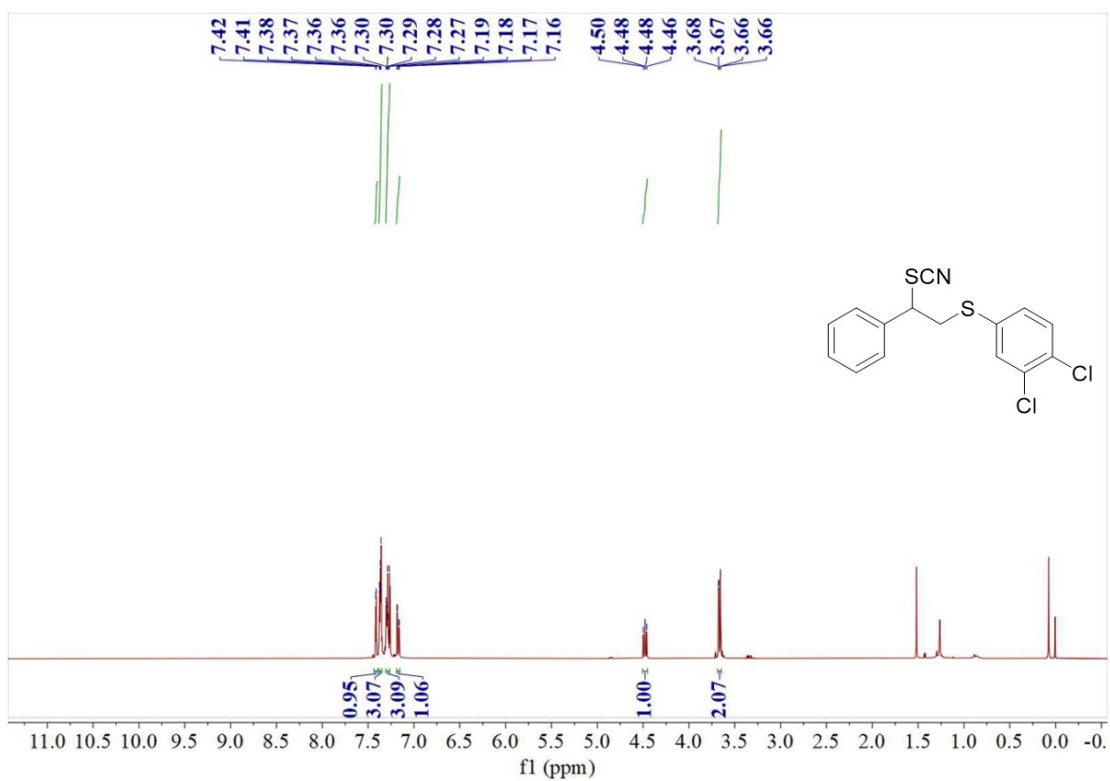

<sup>1</sup>H NMR (400 MHz, CDCl<sub>3</sub>) spectrum of 4am

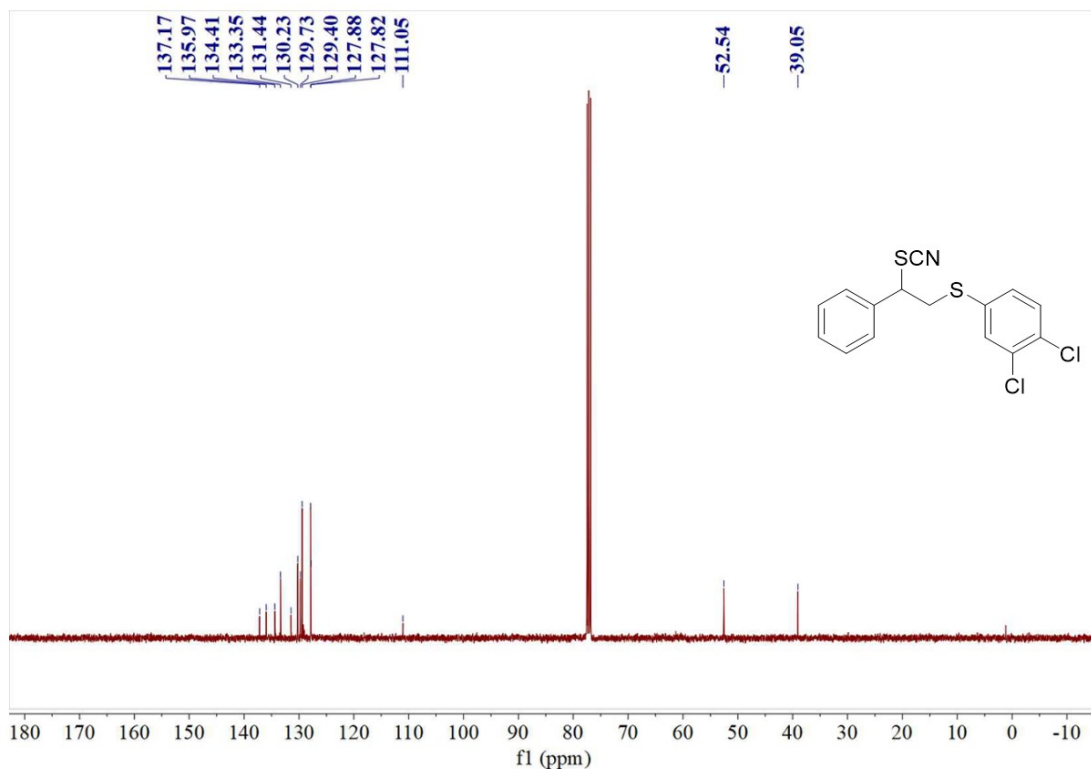

**<sup>13</sup>C NMR (100 MHz, CDCl<sub>3</sub>) spectrum of 4am**

**(2,4-dichlorophenyl)(2-phenyl-2-thiocyanatoethyl)sulfane (4an)**

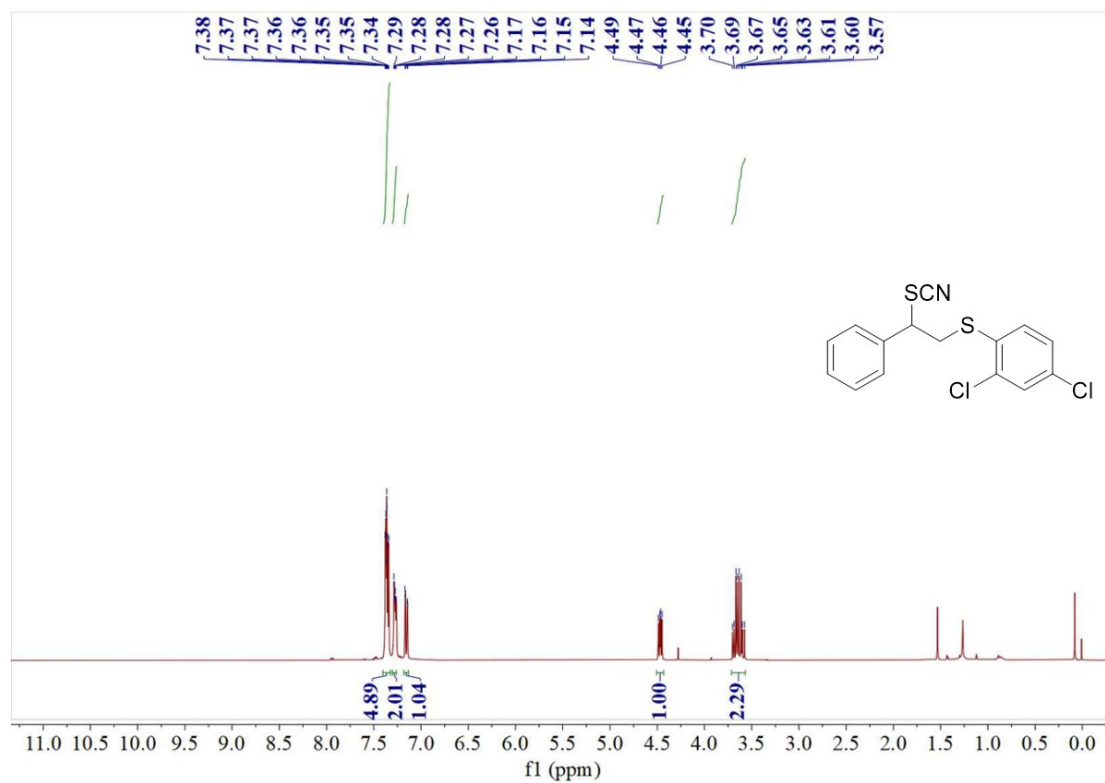

**<sup>1</sup>H NMR (400 MHz, CDCl<sub>3</sub>) spectrum of 4an**

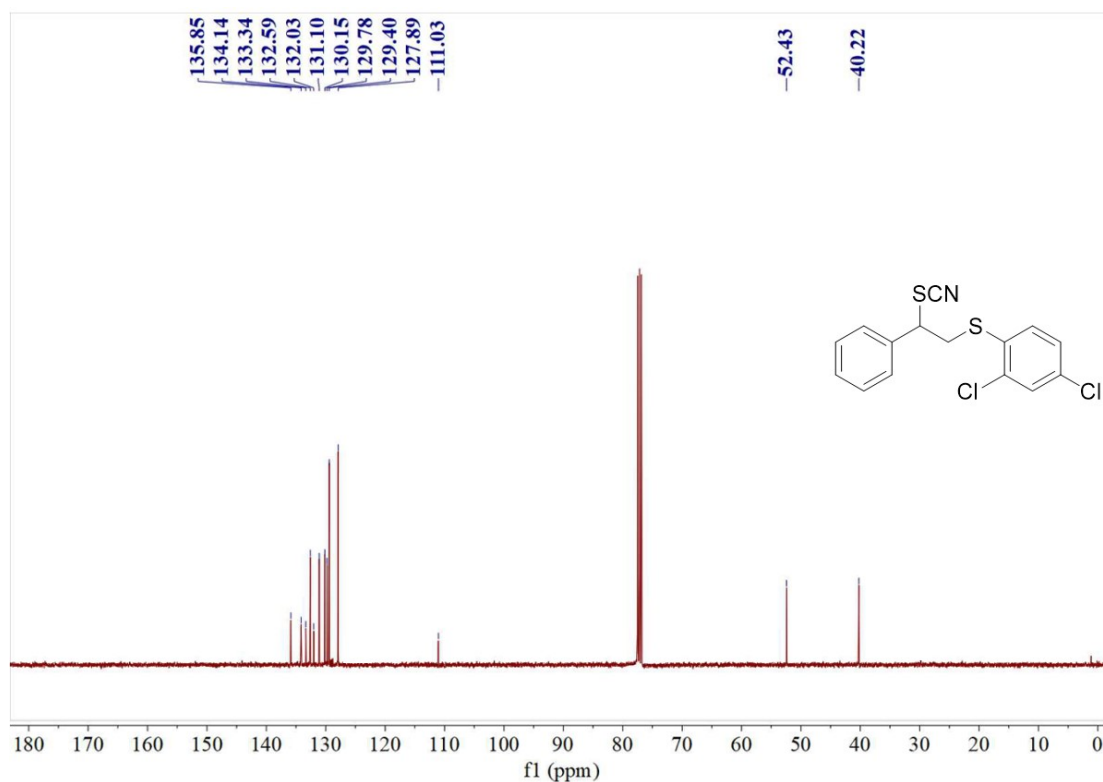

<sup>13</sup>C NMR (100 MHz, CDCl<sub>3</sub>) spectrum of 4an

(2-phenyl-2-thiocyanatoethyl)(2,4,6-triisopropylphenyl)sulfane (4ao)

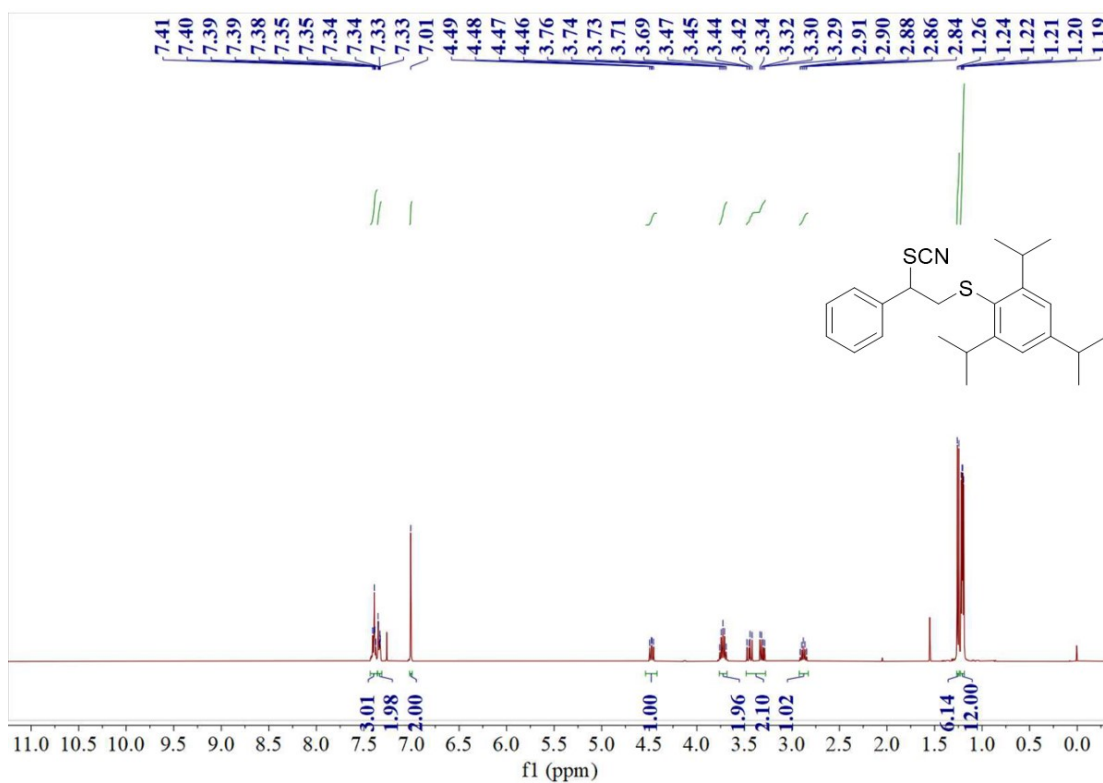

<sup>1</sup>H NMR (400 MHz, CDCl<sub>3</sub>) spectrum of 4ao

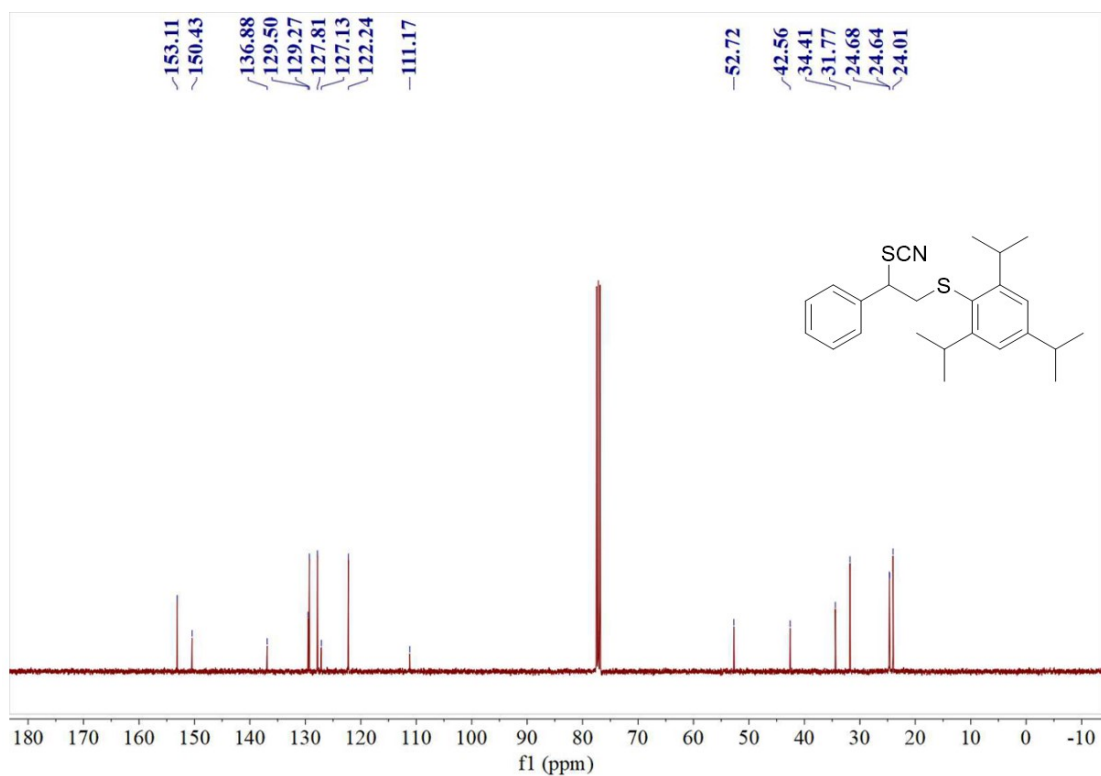

<sup>13</sup>C NMR (100 MHz, CDCl<sub>3</sub>) spectrum of 4ao

naphthalen-2-yl(2-phenyl-2-thiocyanatoethyl)sulfane (4ap)

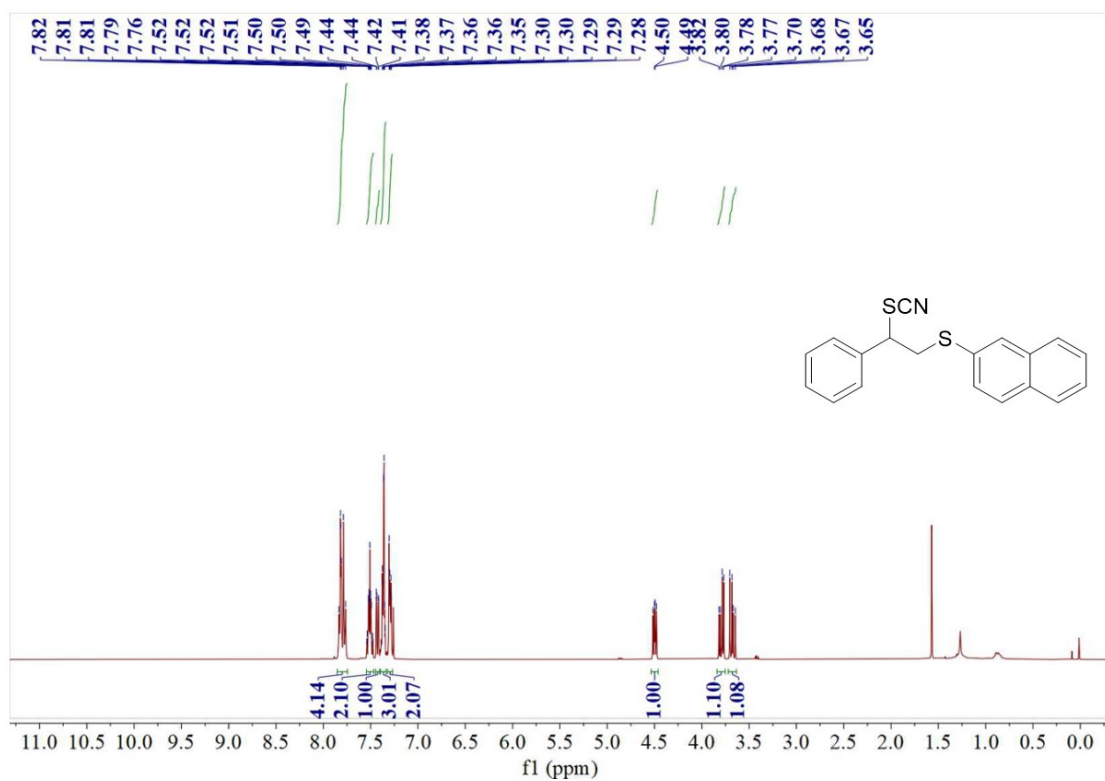

<sup>1</sup>H NMR (400 MHz, CDCl<sub>3</sub>) spectrum of 4ap

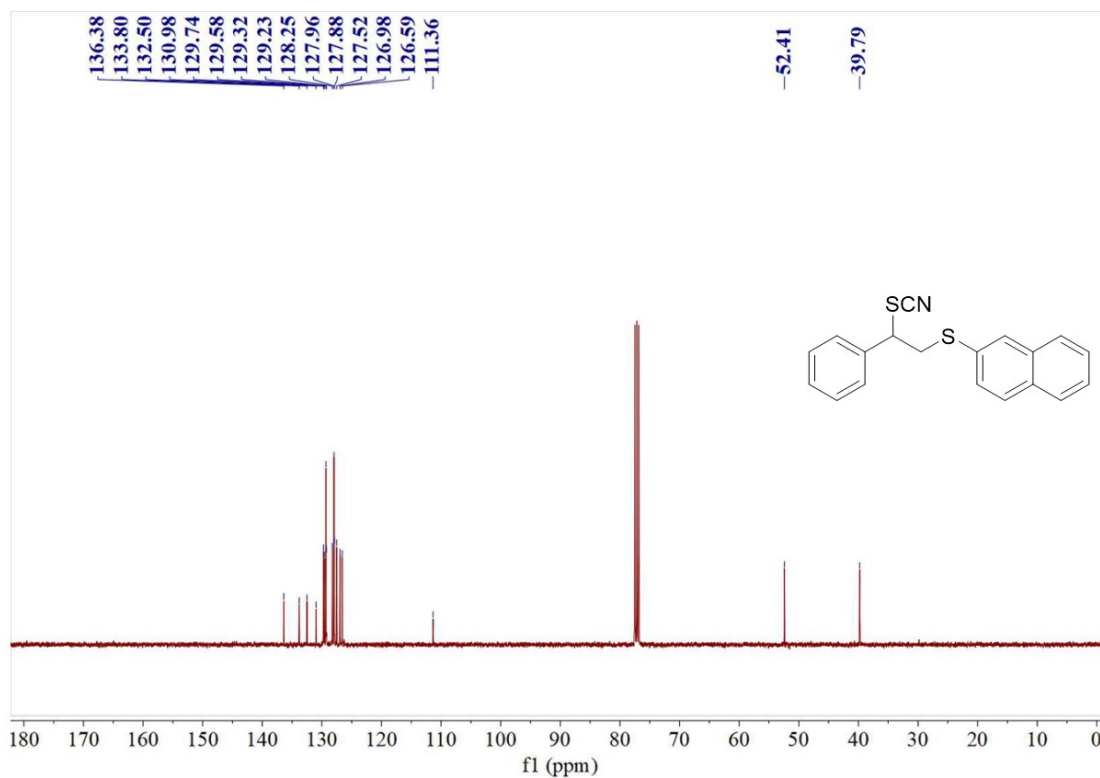

**<sup>13</sup>C NMR (100 MHz, CDCl<sub>3</sub>) spectrum of 4p**

**benzyl(2-phenyl-2-thiocyanatoethyl)sulfane (4aq)**

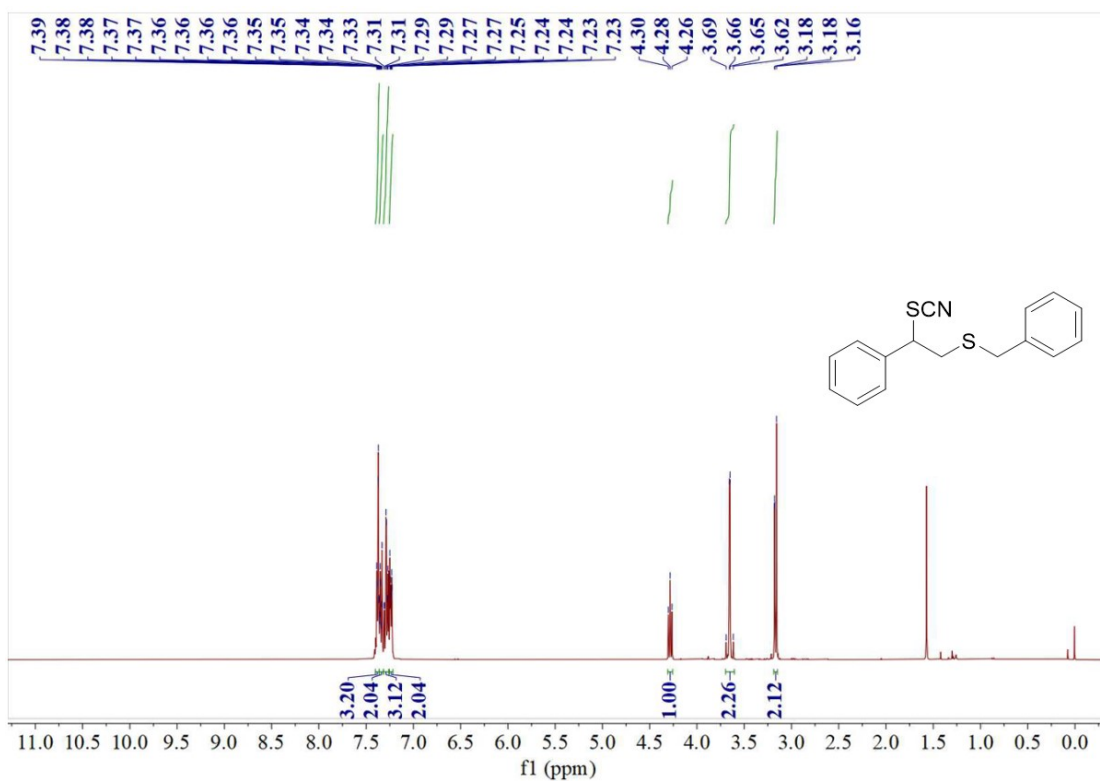

**<sup>1</sup>H NMR (400 MHz, CDCl<sub>3</sub>) spectrum of 4aq**

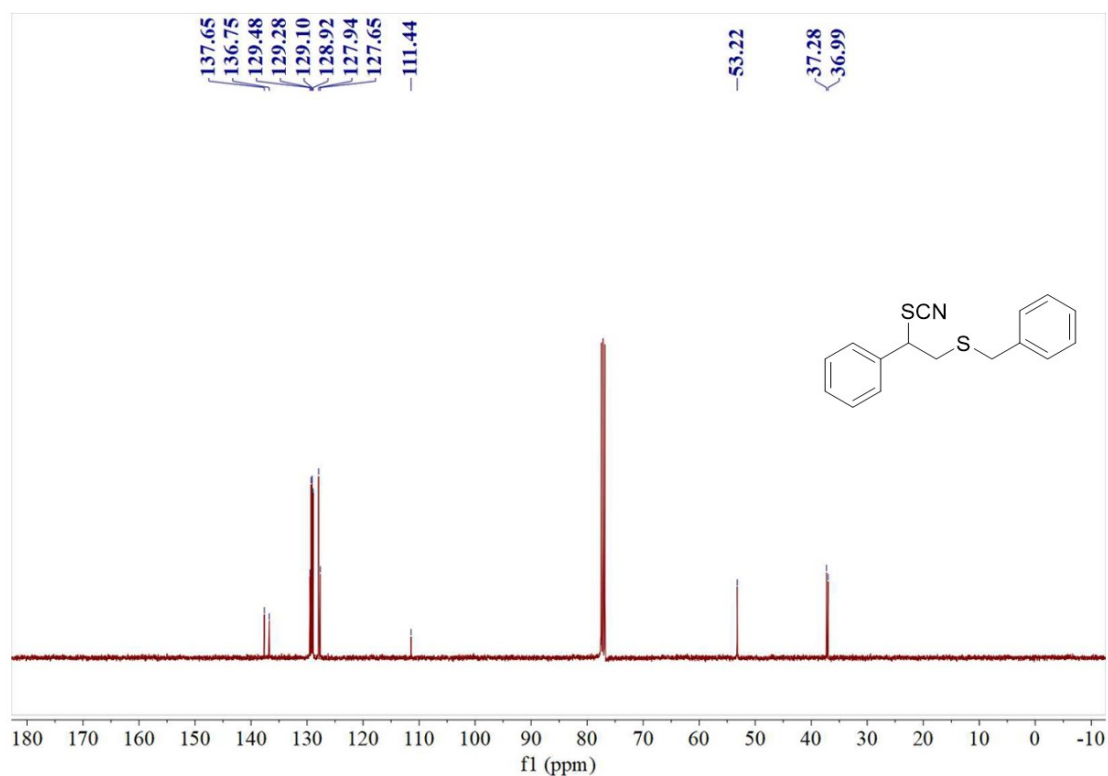

<sup>13</sup>C NMR (100 MHz, CDCl<sub>3</sub>) spectrum of 4aq

phenethyl(2-phenyl-2-thiocyanatoethyl)sulfane (4ar)

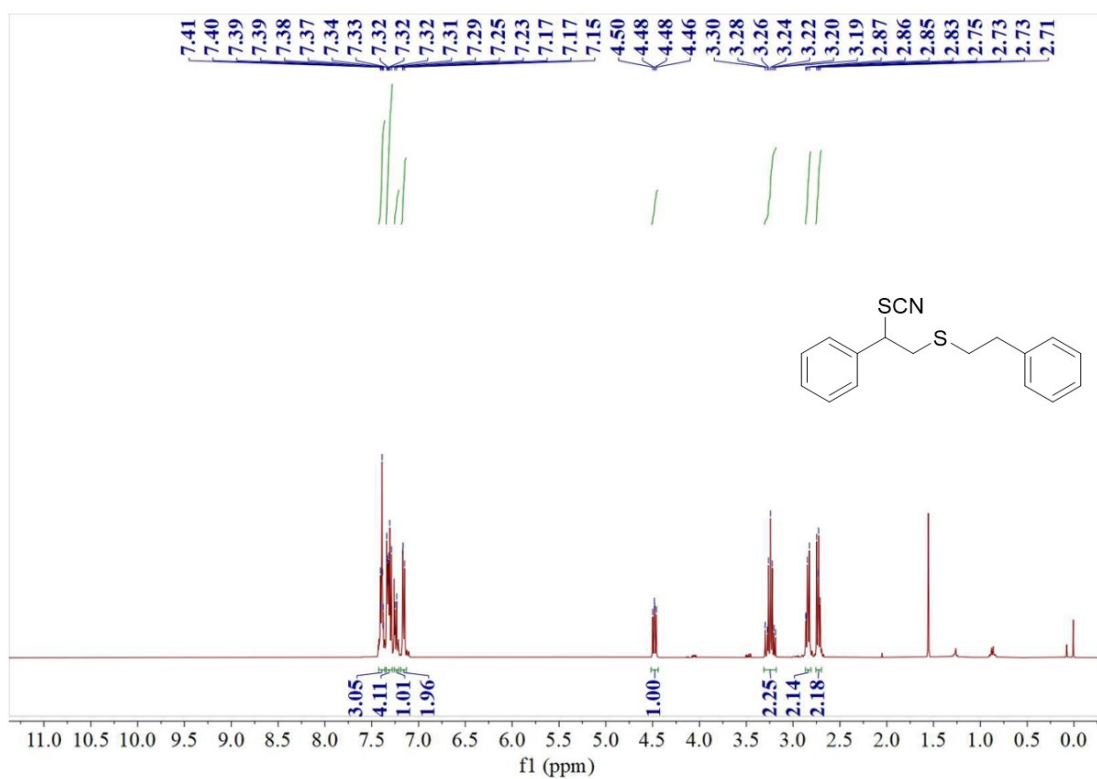

<sup>1</sup>H NMR (400 MHz, CDCl<sub>3</sub>) spectrum of 4ar

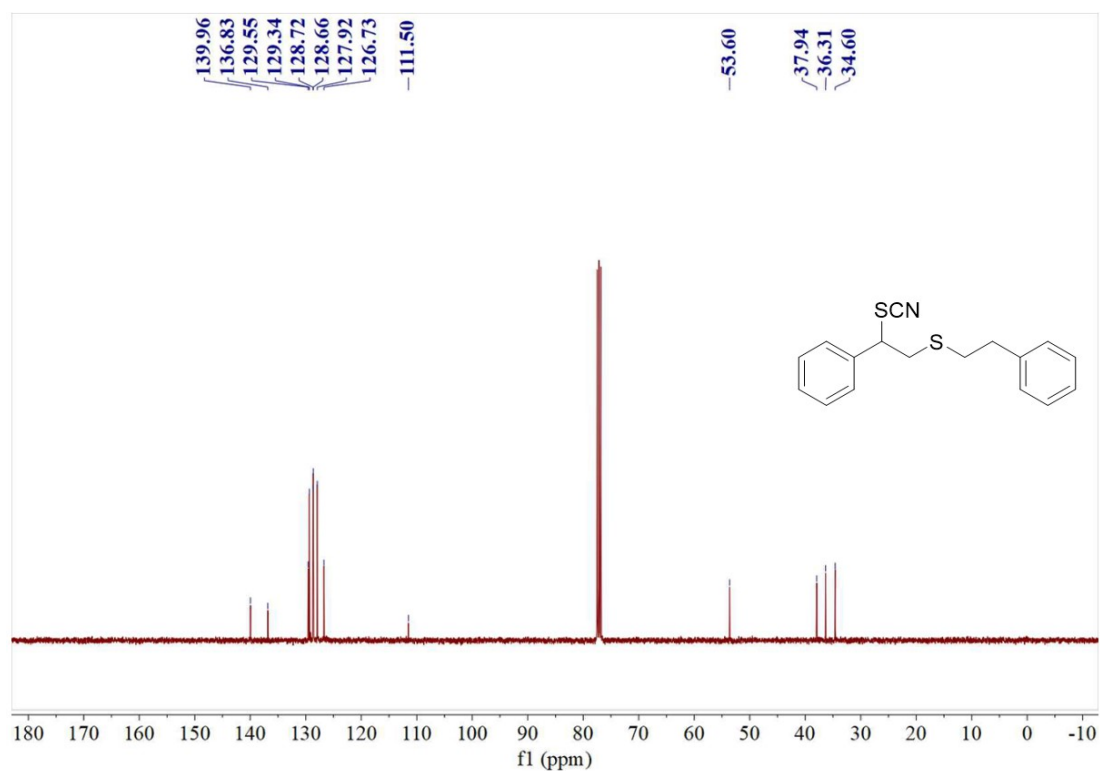

<sup>13</sup>C NMR (100 MHz, CDCl<sub>3</sub>) spectrum of 4ar

isobutyl(2-phenyl-2-thiocyanatoethyl)sulfane (4as)

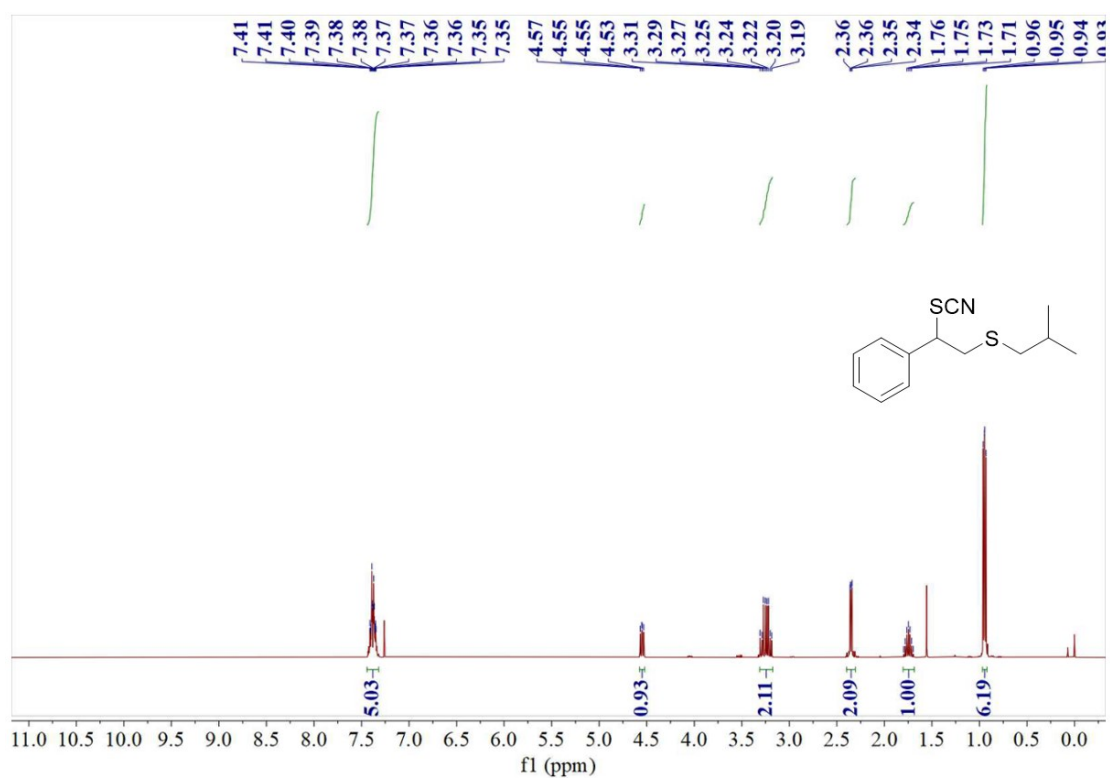

<sup>1</sup>H NMR (400 MHz, CDCl<sub>3</sub>) spectrum of 4as



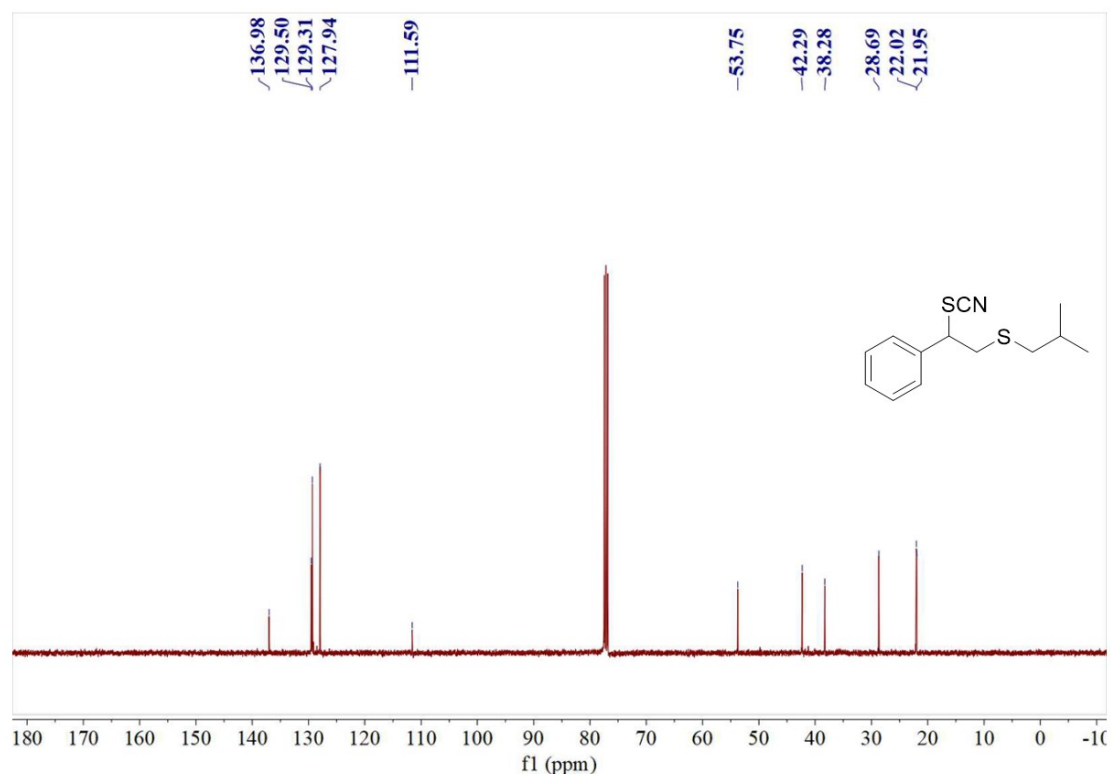

<sup>13</sup>C NMR (100 MHz, CDCl<sub>3</sub>) spectrum of 4as

butyl(2-phenyl-2-thiocyanatoethyl)sulfane (4at)

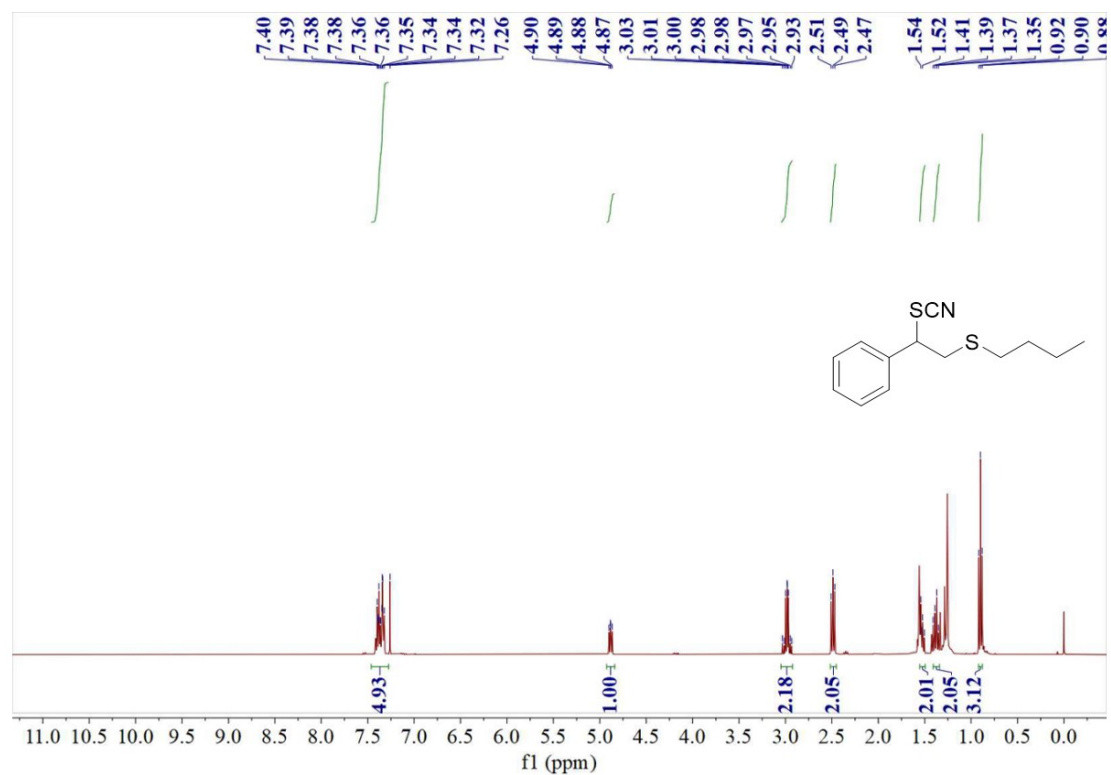

<sup>1</sup>H NMR (400 MHz, CDCl<sub>3</sub>) spectrum of 4at

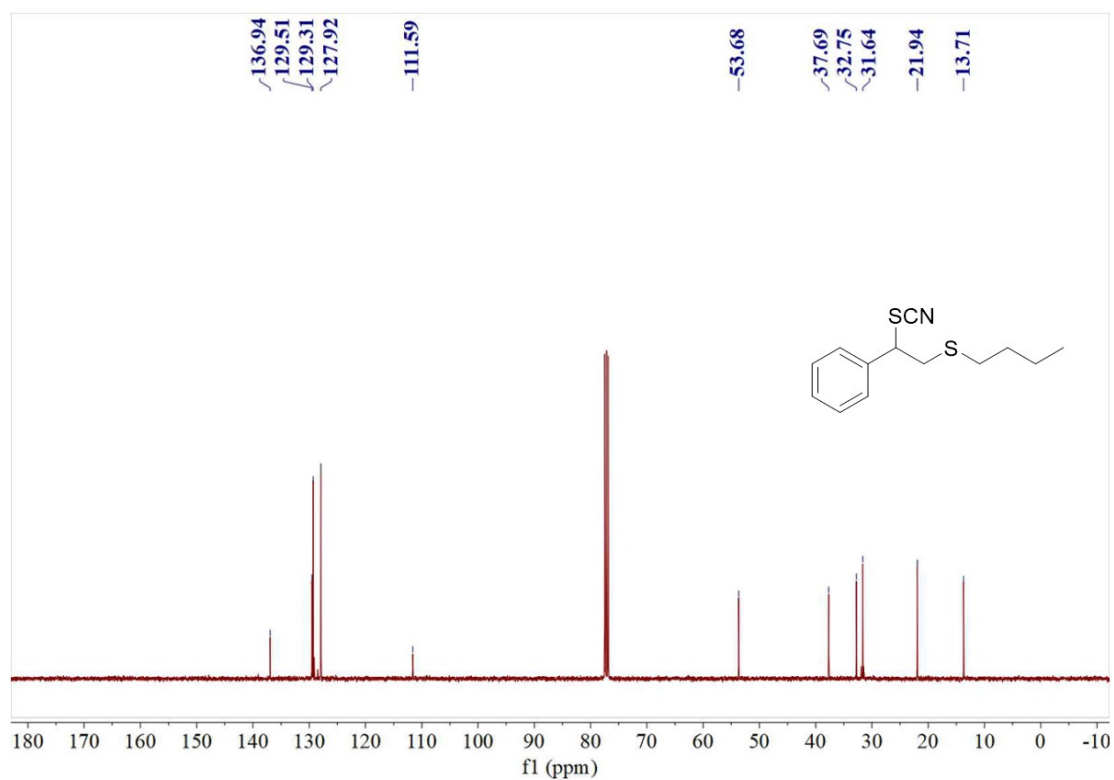

<sup>13</sup>C NMR (100 MHz, CDCl<sub>3</sub>) spectrum of 4t

isopentyl(2-phenyl-2-thiocyanatoethyl)sulfane (4au)

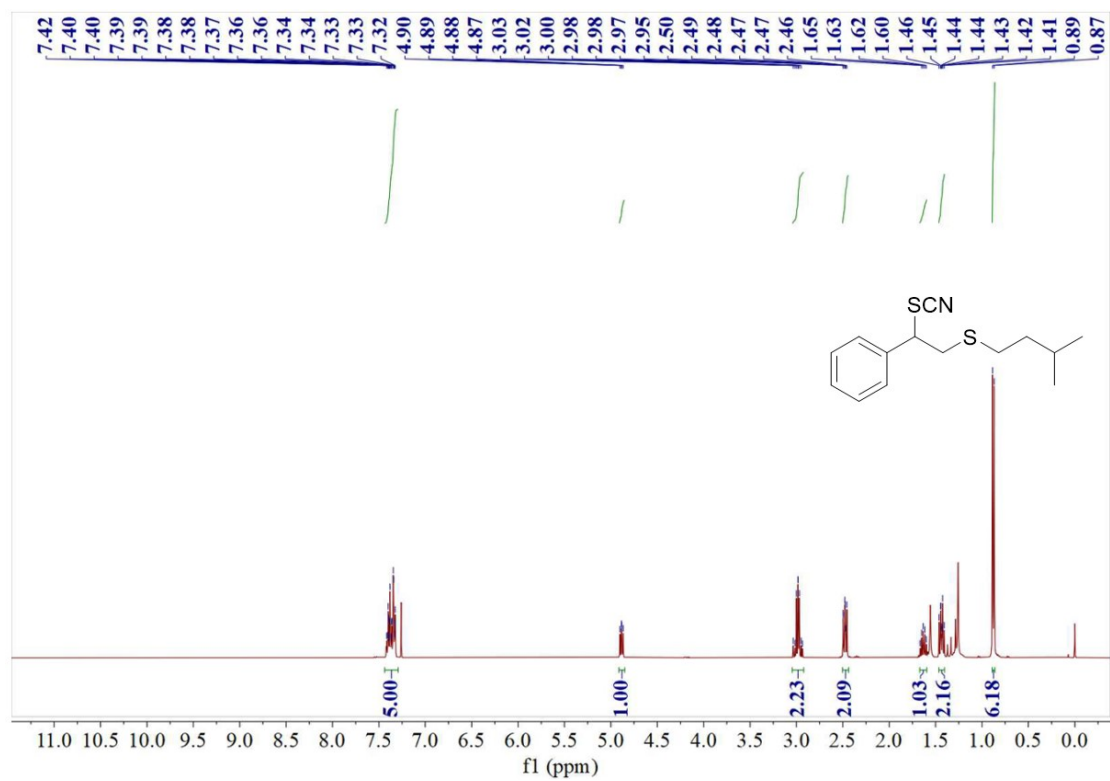

<sup>1</sup>H NMR (400 MHz, CDCl<sub>3</sub>) spectrum of 4au

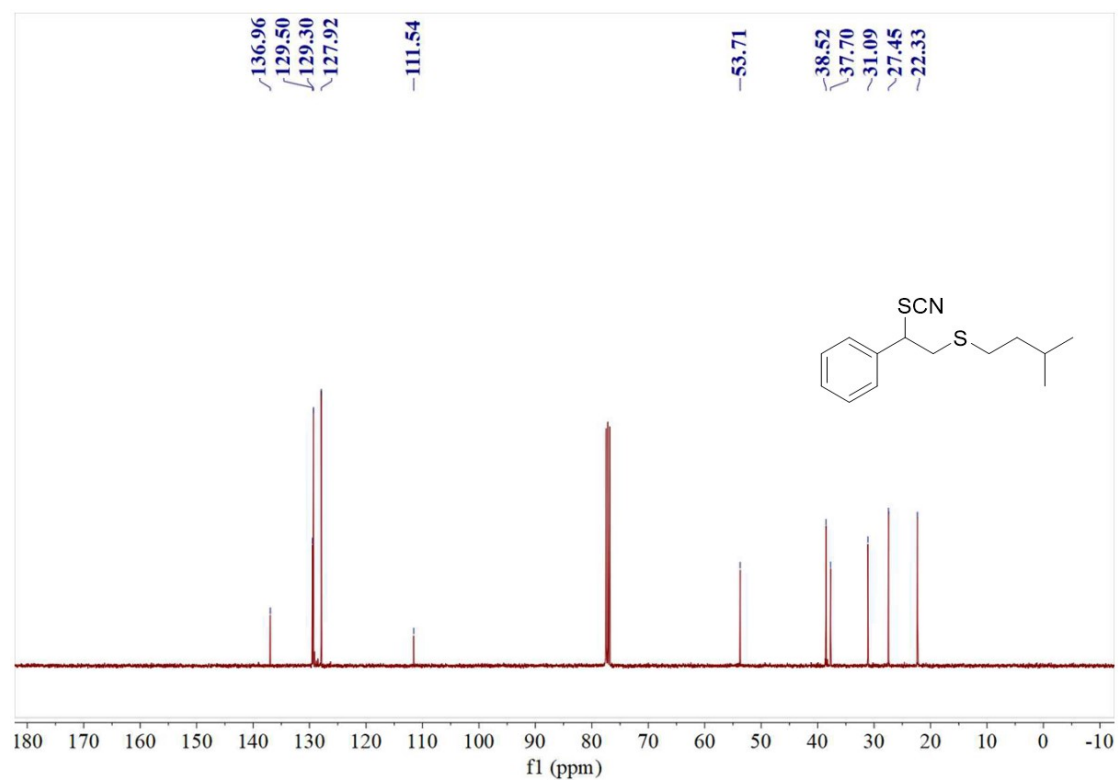

<sup>13</sup>C NMR (100 MHz, CDCl<sub>3</sub>) spectrum of 4au

heptan-3-yl(2-phenyl-2-thiocyanatoethyl)sulfane (4av)

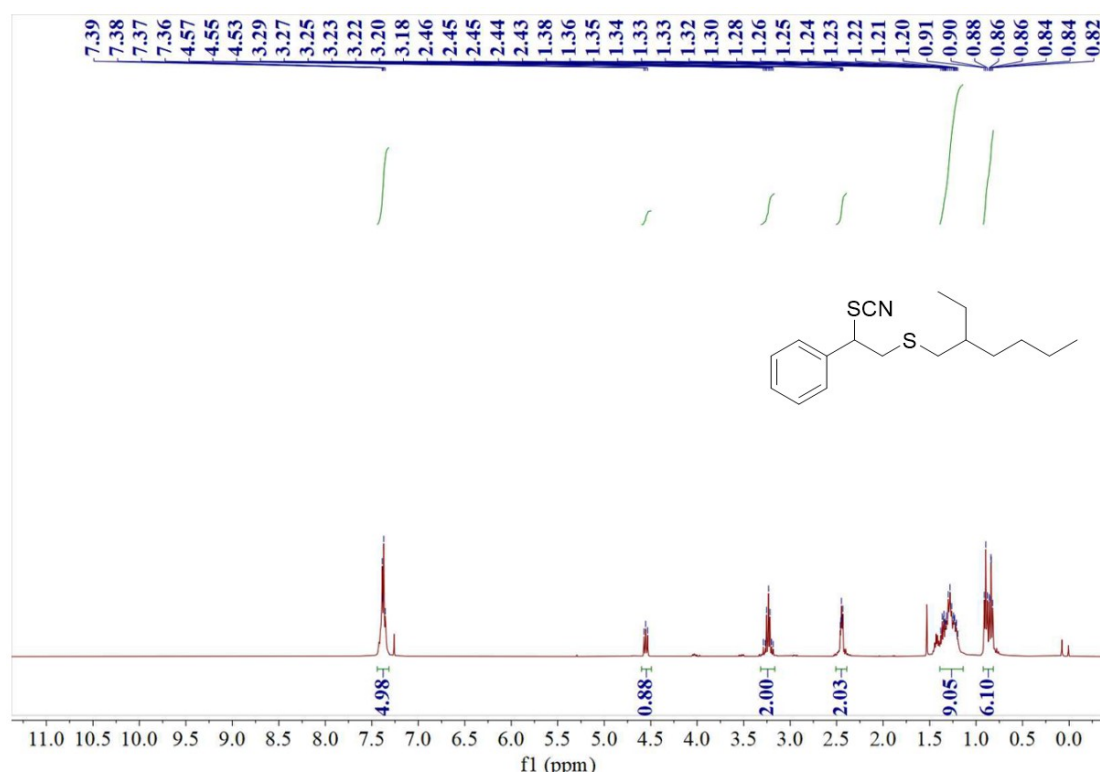

<sup>1</sup>H NMR (400 MHz, CDCl<sub>3</sub>) spectrum of 4av

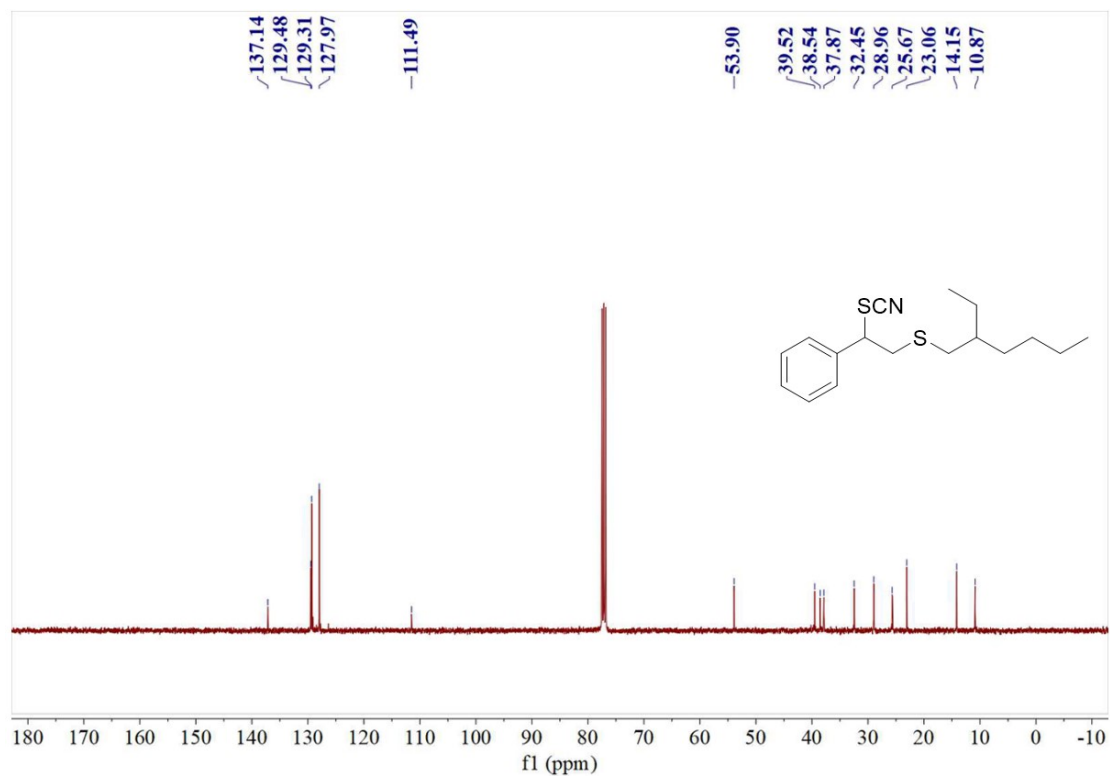

<sup>13</sup>C NMR (100 MHz, CDCl<sub>3</sub>) spectrum of 4av

decyl(2-phenyl-2-thiocyanatoethyl)sulfane (4aw)

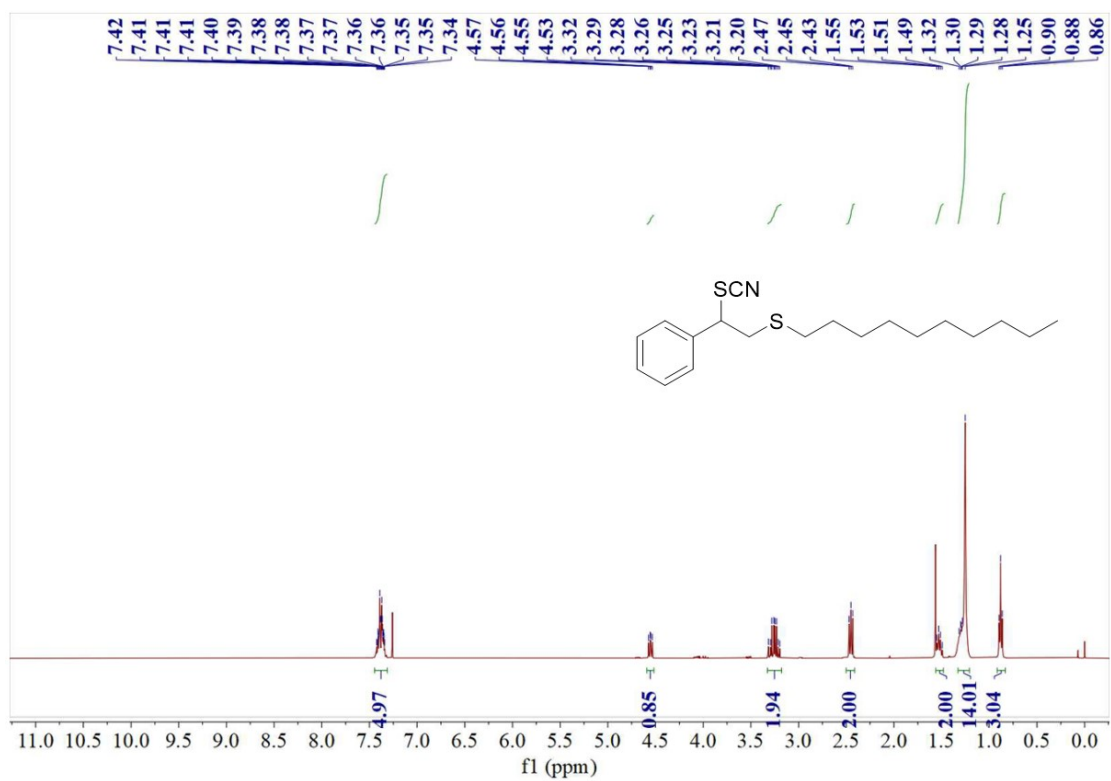

<sup>1</sup>H NMR (400 MHz, CDCl<sub>3</sub>) spectrum of 4aw

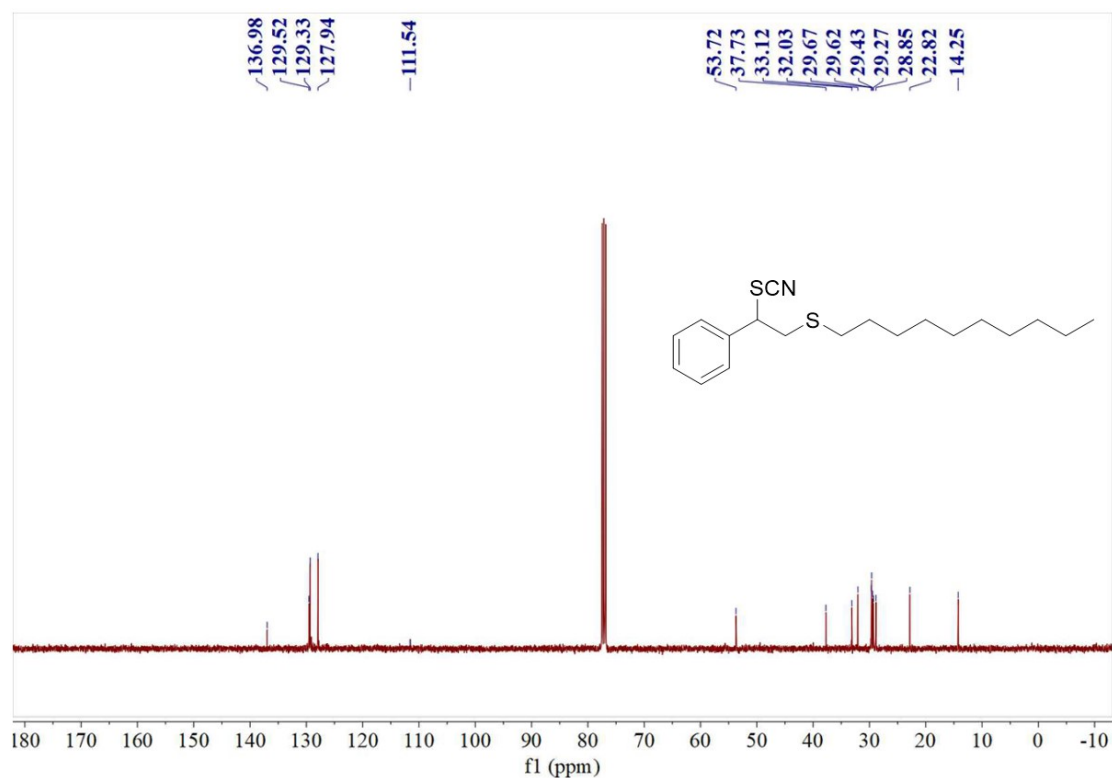

**<sup>13</sup>C NMR (100 MHz, CDCl<sub>3</sub>) spectrum of 4w**

**cyclohexyl(2-phenyl-2-thiocyanatoethyl)sulfane (4ax)**

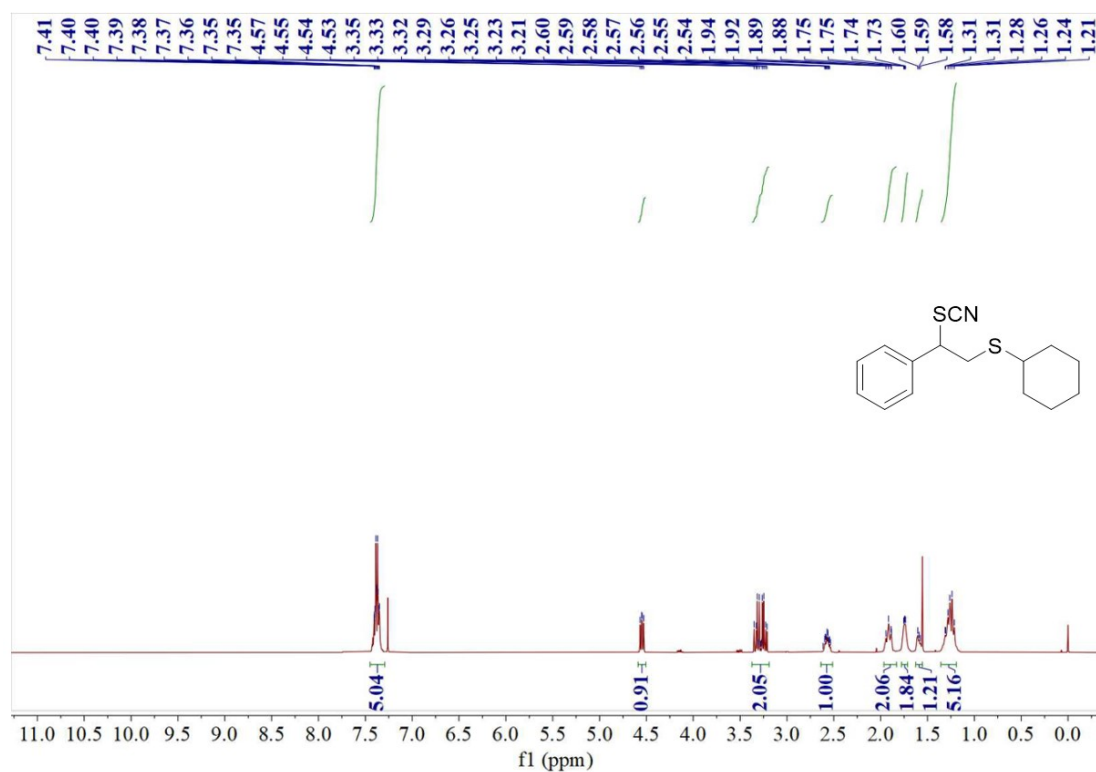

**<sup>1</sup>H NMR (400 MHz, CDCl<sub>3</sub>) spectrum of 4ax**

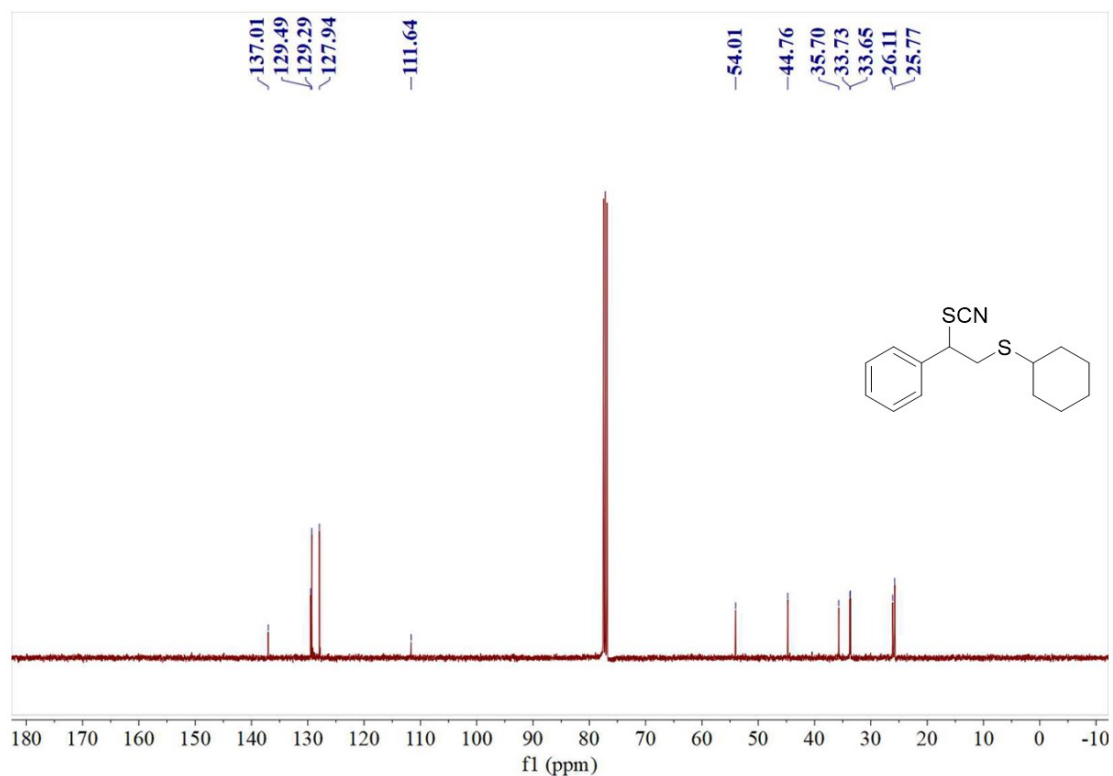

<sup>13</sup>C NMR (100 MHz, CDCl<sub>3</sub>) spectrum of 4ax

cyclopentyl(2-phenyl-2-thiocyanatoethyl)sulfane (4ay)

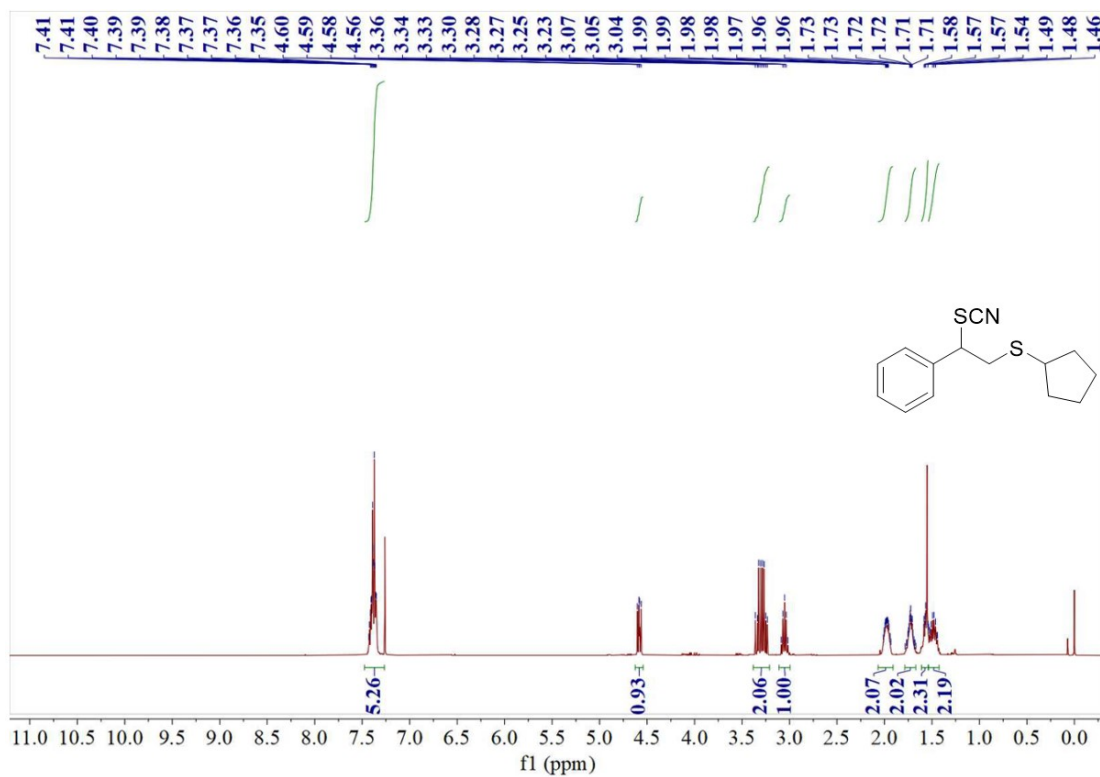

<sup>1</sup>H NMR (400 MHz, CDCl<sub>3</sub>) spectrum of 4ay

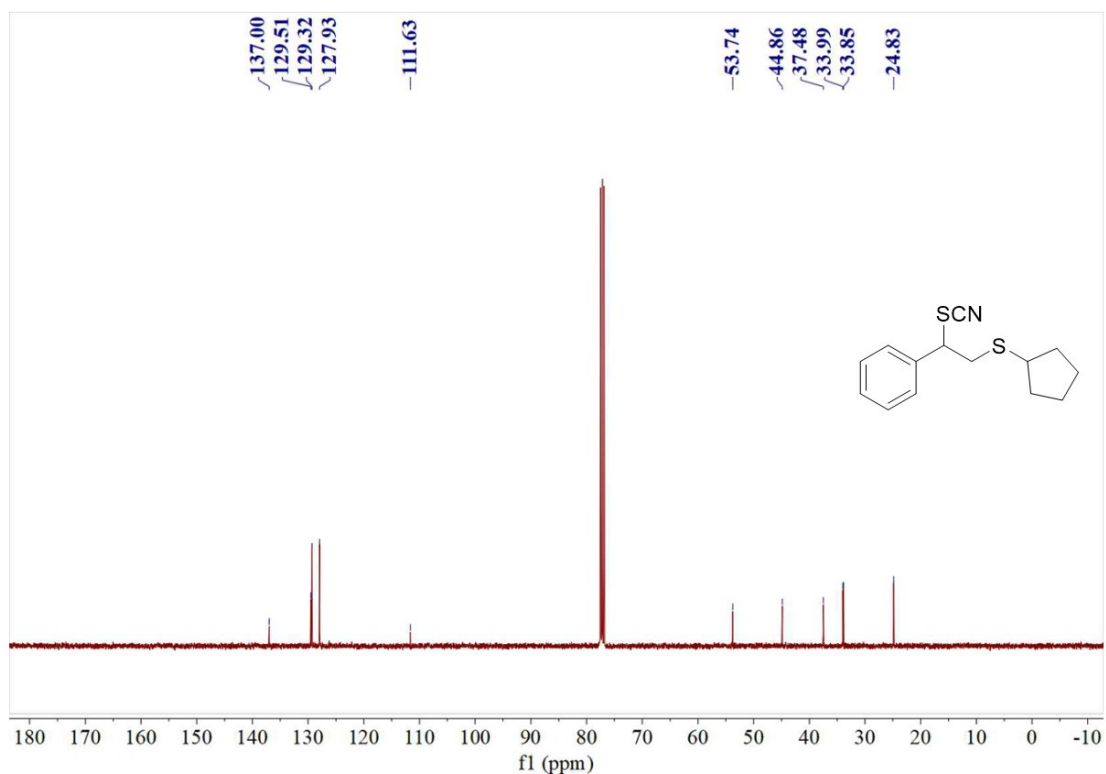

<sup>13</sup>C NMR (100 MHz, CDCl<sub>3</sub>) spectrum of 4ay

(4-fluorophenyl)(2-(4-fluorophenyl)-2-thiocyanatoethyl)sulfane (4ba)

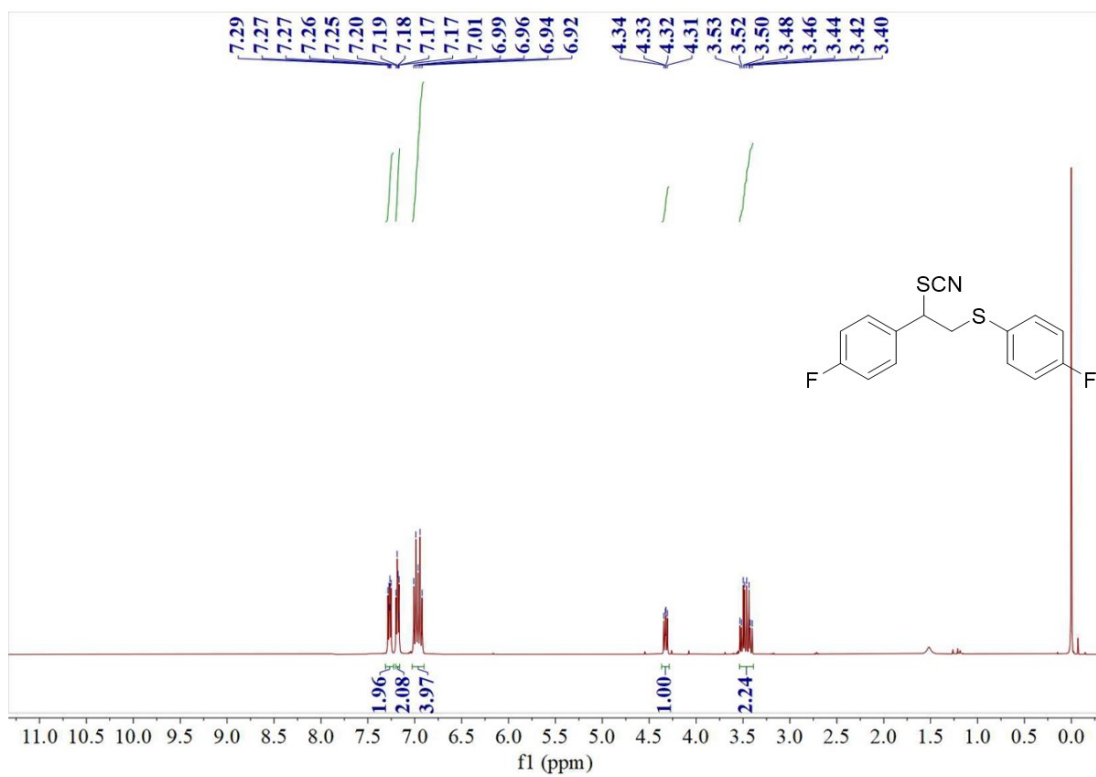

<sup>1</sup>H NMR (400 MHz, CDCl<sub>3</sub>) spectrum of 4ba

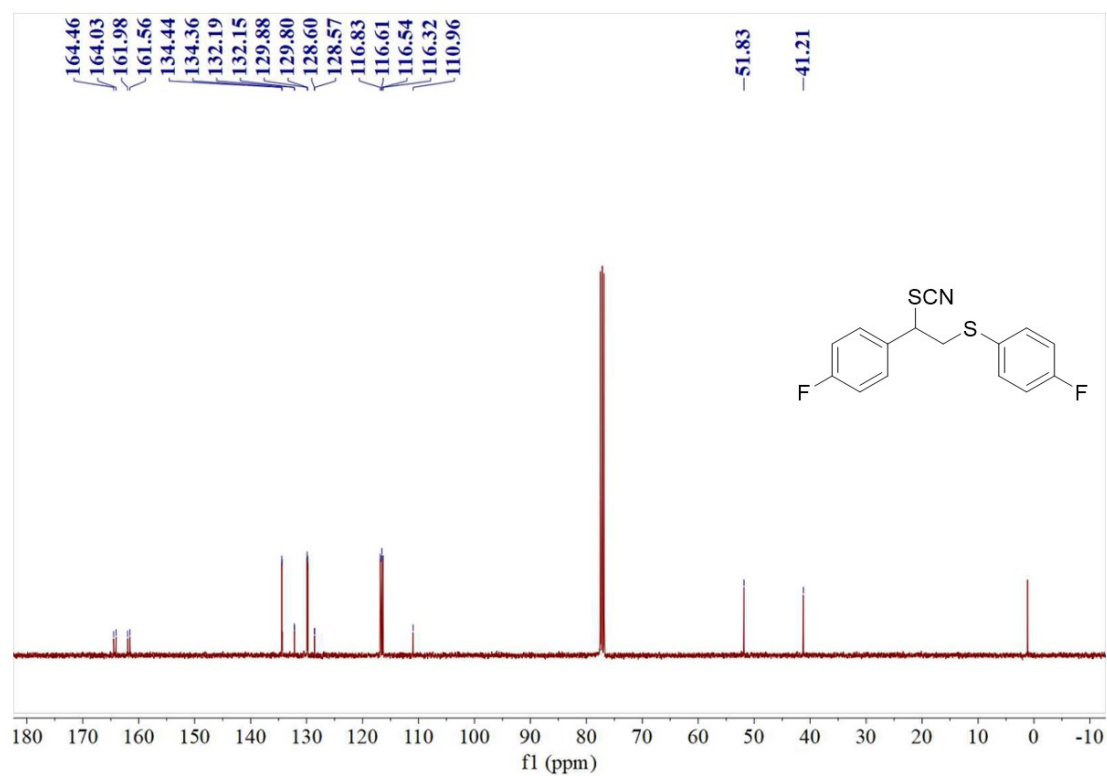

<sup>13</sup>C NMR (100 MHz, CDCl<sub>3</sub>) spectrum of 4ba

(2-(4-chlorophenyl)-2-thiocyanatoethyl)(4-fluorophenyl)sulfane (4ca)

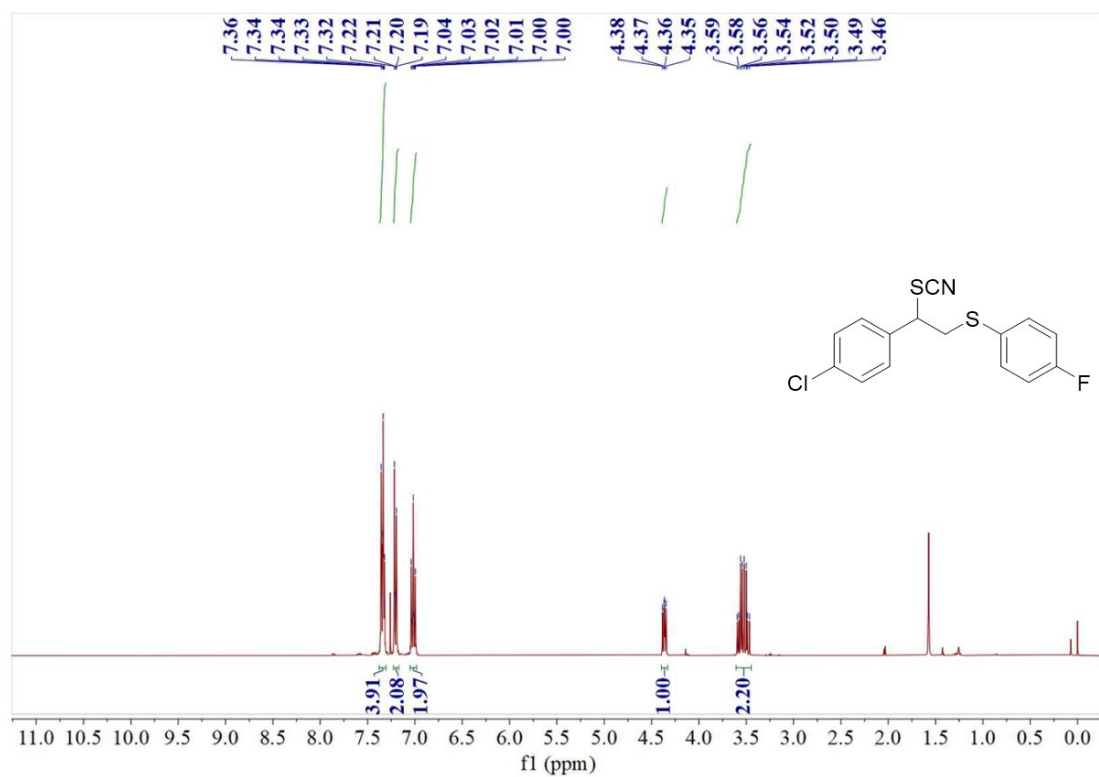

<sup>1</sup>H NMR (400 MHz, CDCl<sub>3</sub>) spectrum of 4ca



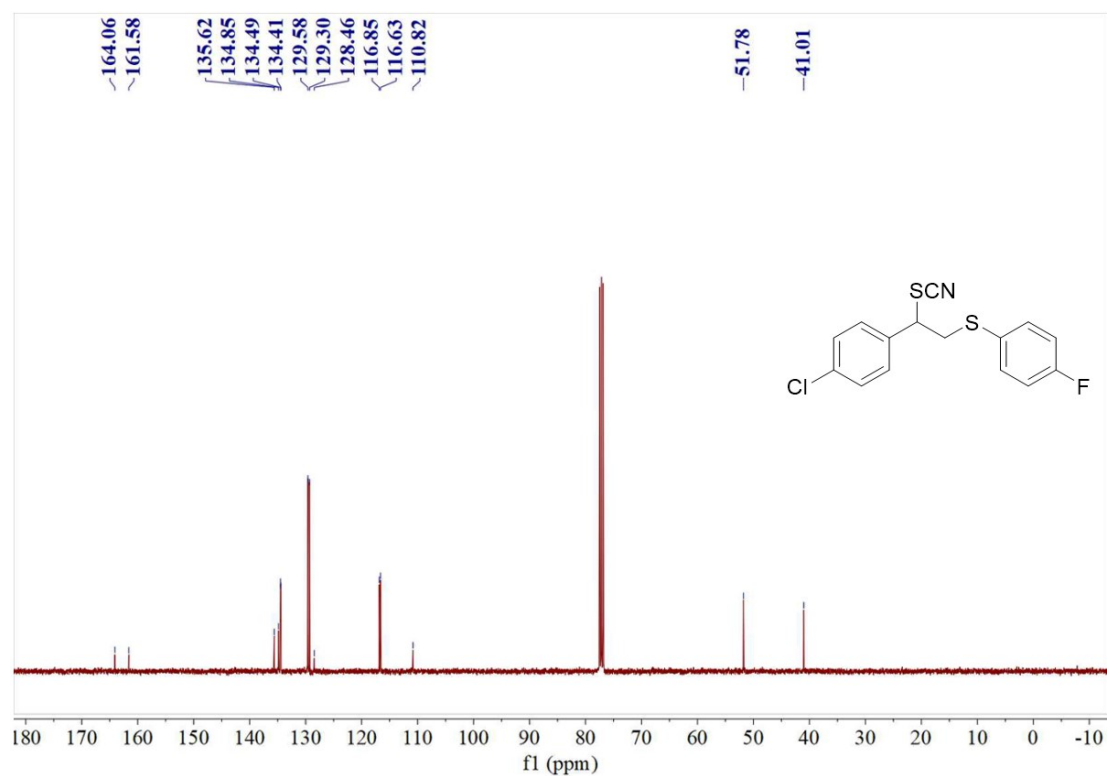

<sup>13</sup>C NMR (100 MHz, CDCl<sub>3</sub>) spectrum of 4ca

(2-(4-bromophenyl)-2-thiocyanatoethyl)(4-fluorophenyl)sulfane (4da)

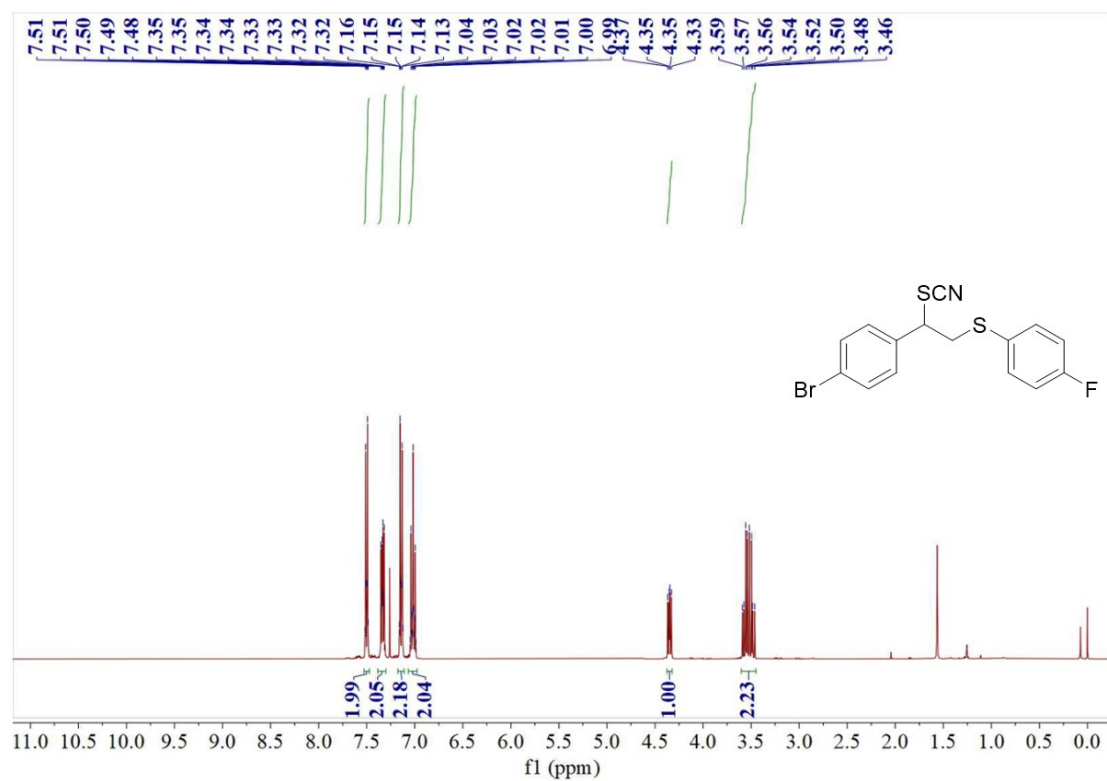

<sup>1</sup>H NMR (400 MHz, CDCl<sub>3</sub>) spectrum of 4da

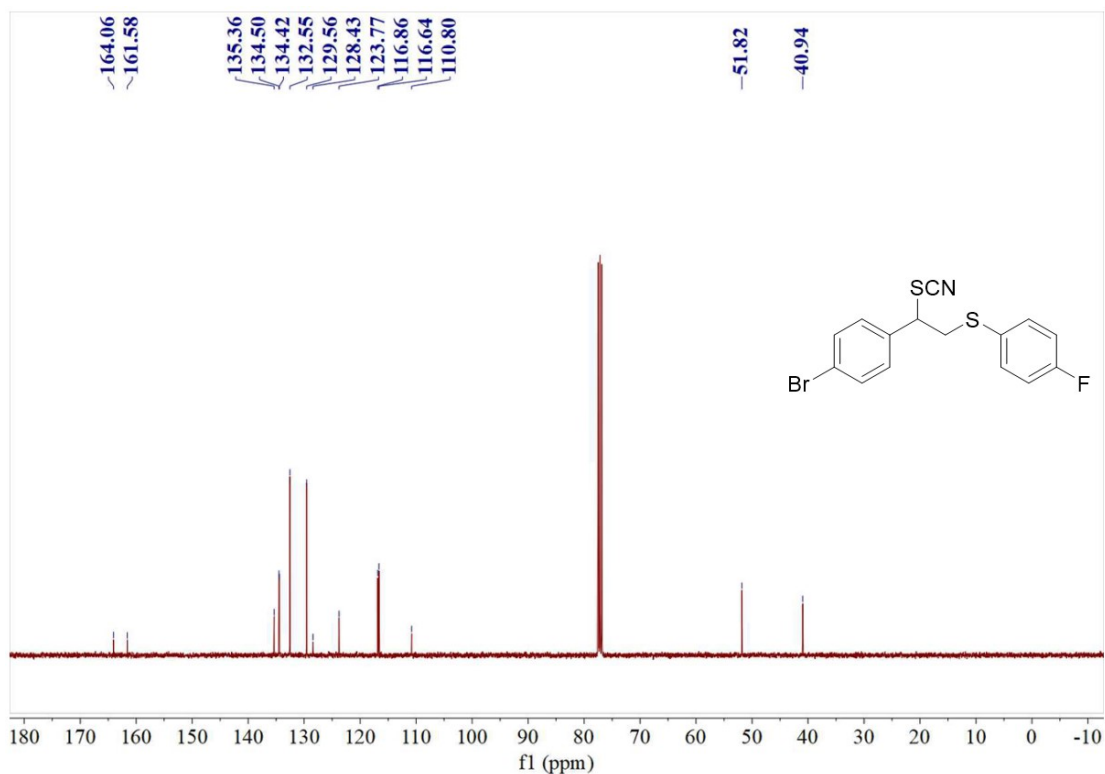

<sup>13</sup>C NMR (100 MHz, CDCl<sub>3</sub>) spectrum of 4da

(2-(2-chlorophenyl)-2-thiocyanatoethyl)(4-fluorophenyl)sulfane (4ea)

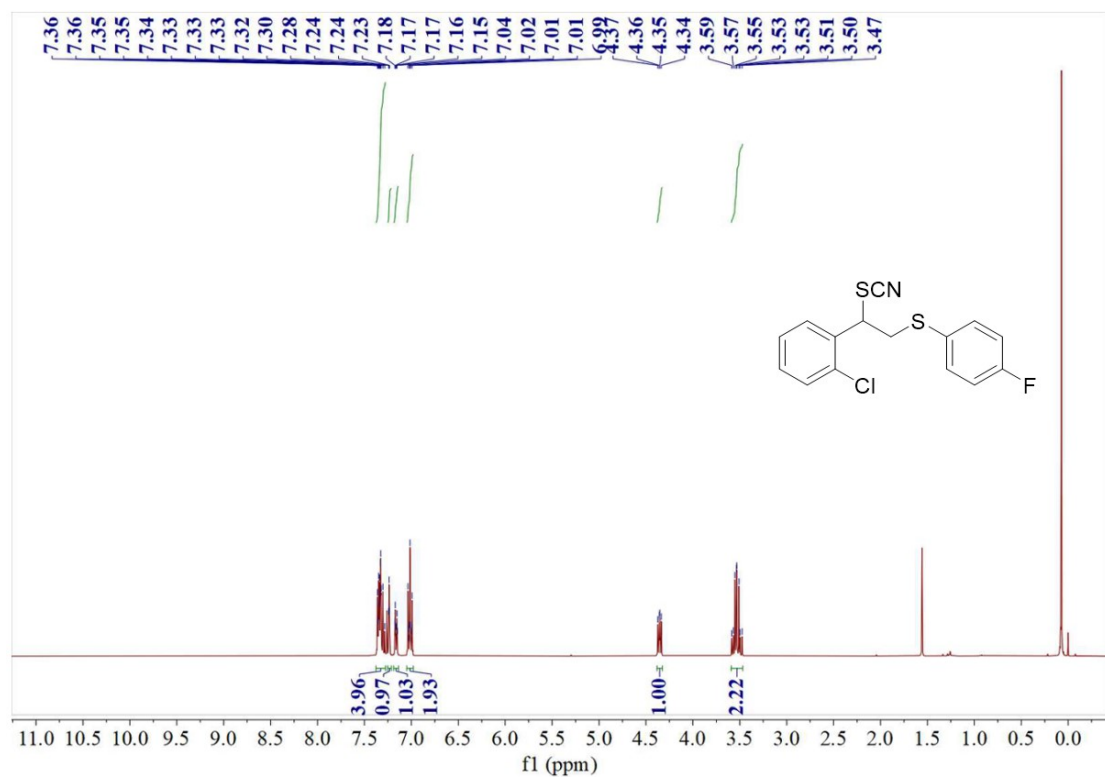

<sup>1</sup>H NMR (400 MHz, CDCl<sub>3</sub>) spectrum of 4ea

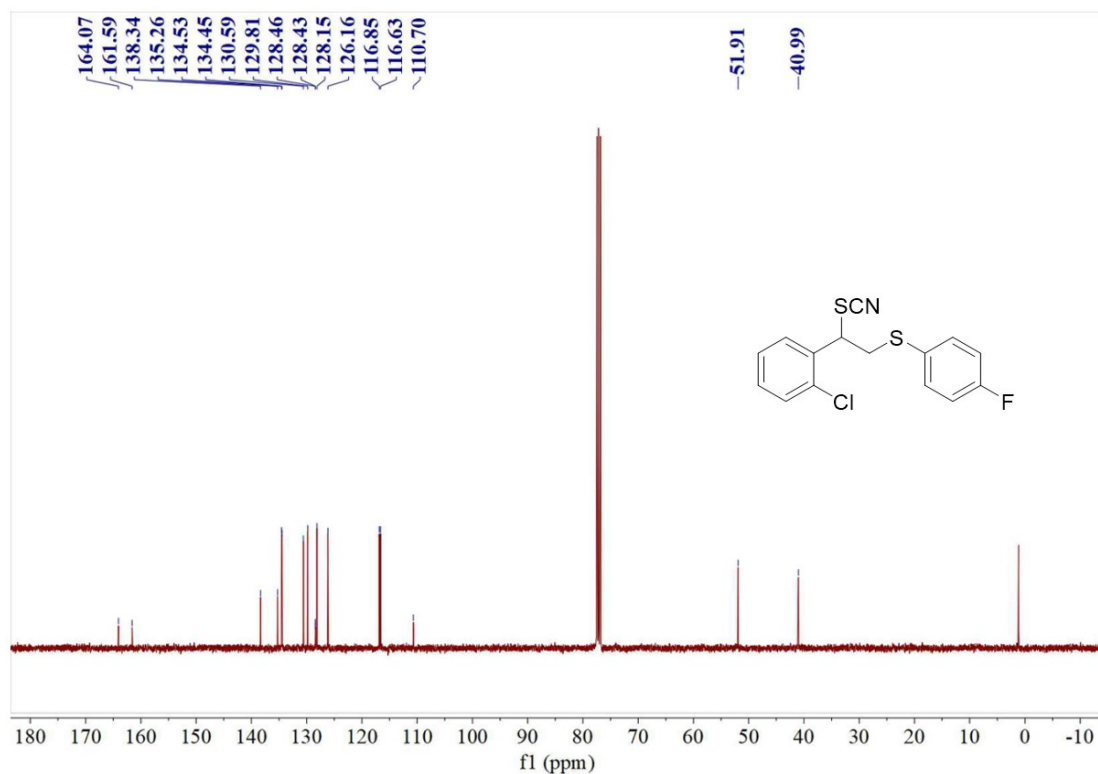

<sup>13</sup>C NMR (100 MHz, CDCl<sub>3</sub>) spectrum of 4ea

(2-(3-chlorophenyl)-2-thiocyanatoethyl)(4-fluorophenyl)sulfane (4fa)

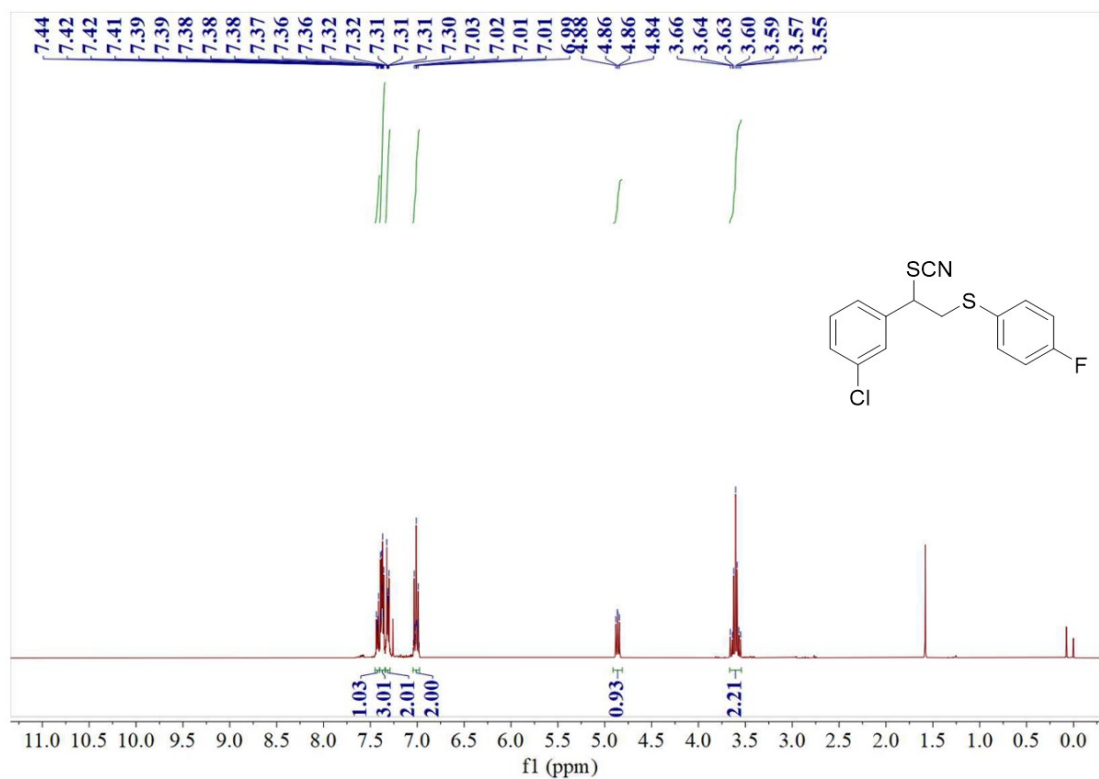

<sup>1</sup>H NMR (400 MHz, CDCl<sub>3</sub>) spectrum of 4fa

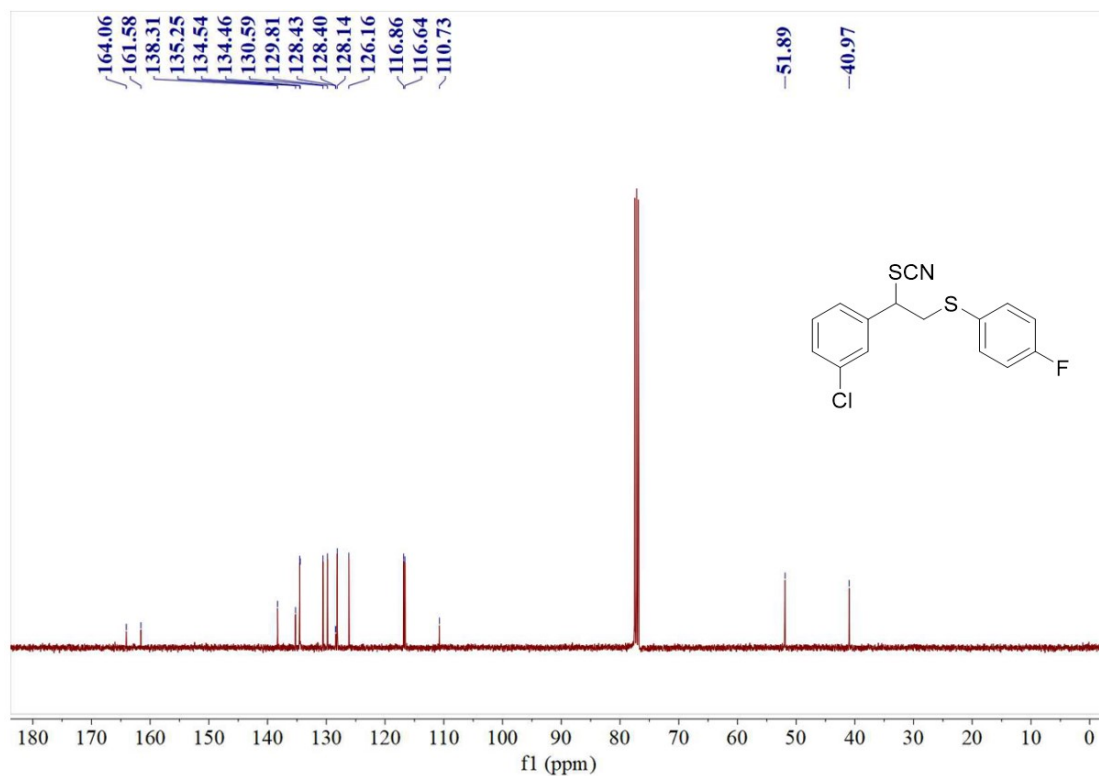

<sup>13</sup>C NMR (100 MHz, CDCl<sub>3</sub>) spectrum of 4fa

(4-fluorophenyl)(2-thiocyanato-2-(p-tolyl)ethyl)sulfane (4ga)

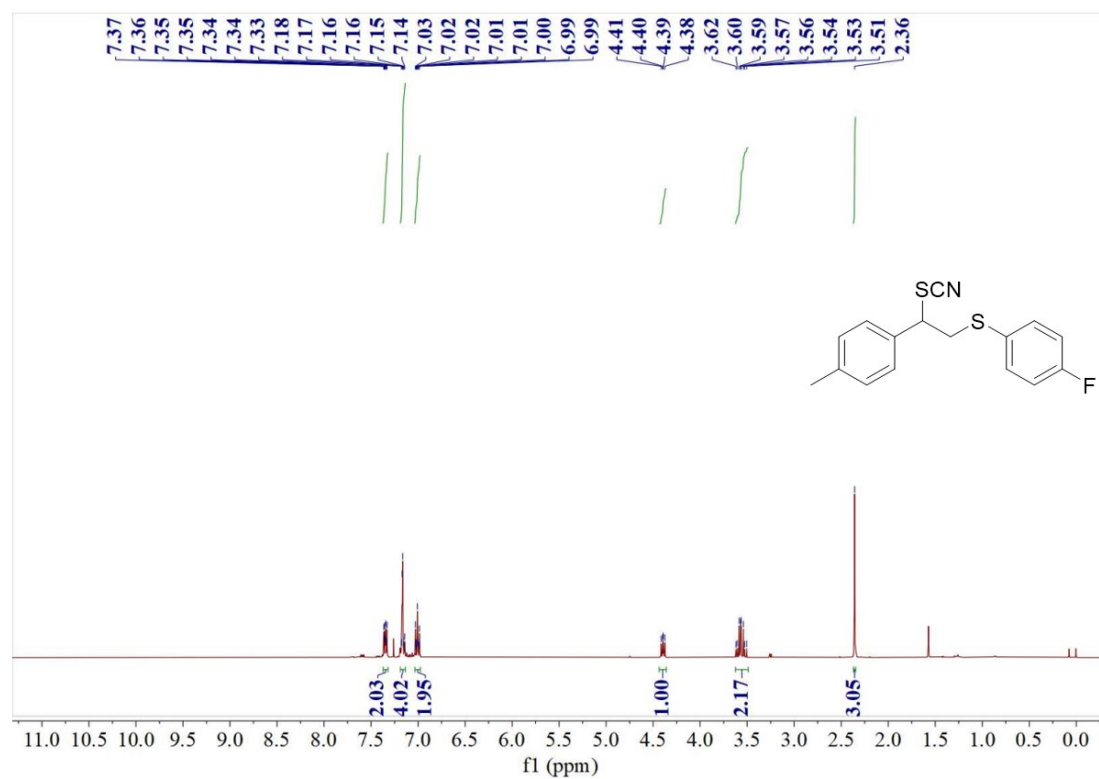

<sup>1</sup>H NMR (400 MHz, CDCl<sub>3</sub>) spectrum of 4ga

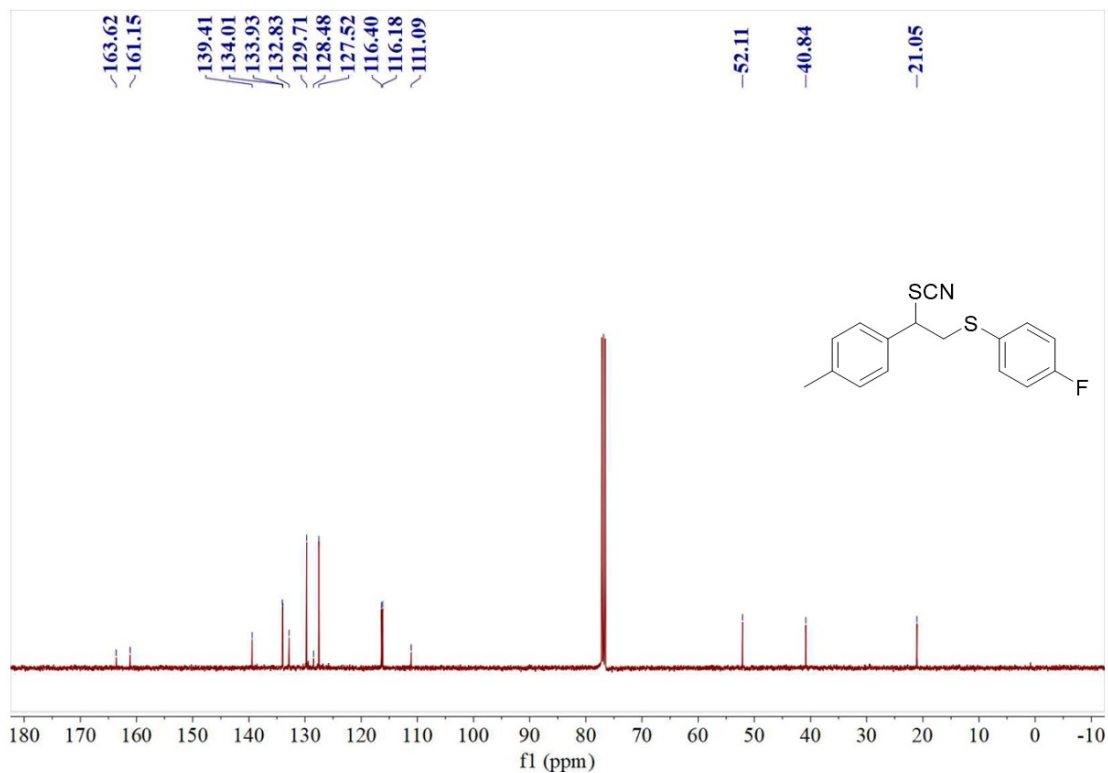

<sup>13</sup>C NMR (100 MHz, CDCl<sub>3</sub>) spectrum of 4ga

(2-(4-(tert-butyl)phenyl)-2-thiocyanatoethyl)(4-fluorophenyl)sulfane (4ha)

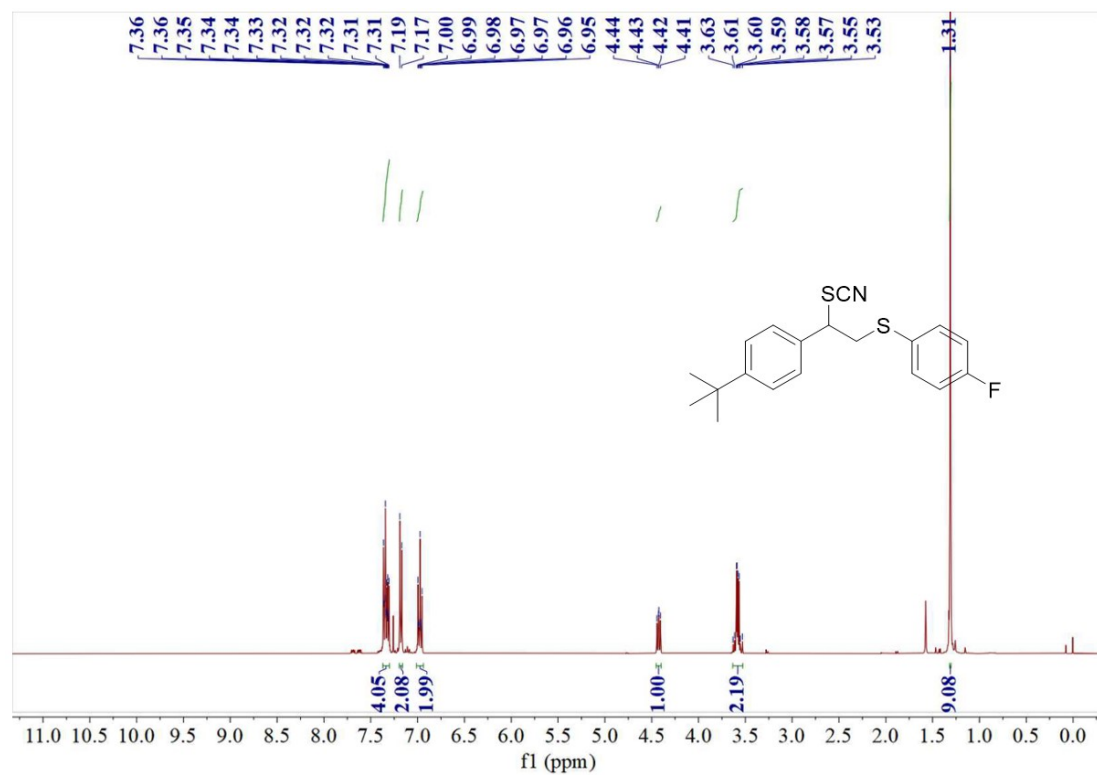

<sup>1</sup>H NMR (400 MHz, CDCl<sub>3</sub>) spectrum of 4ha

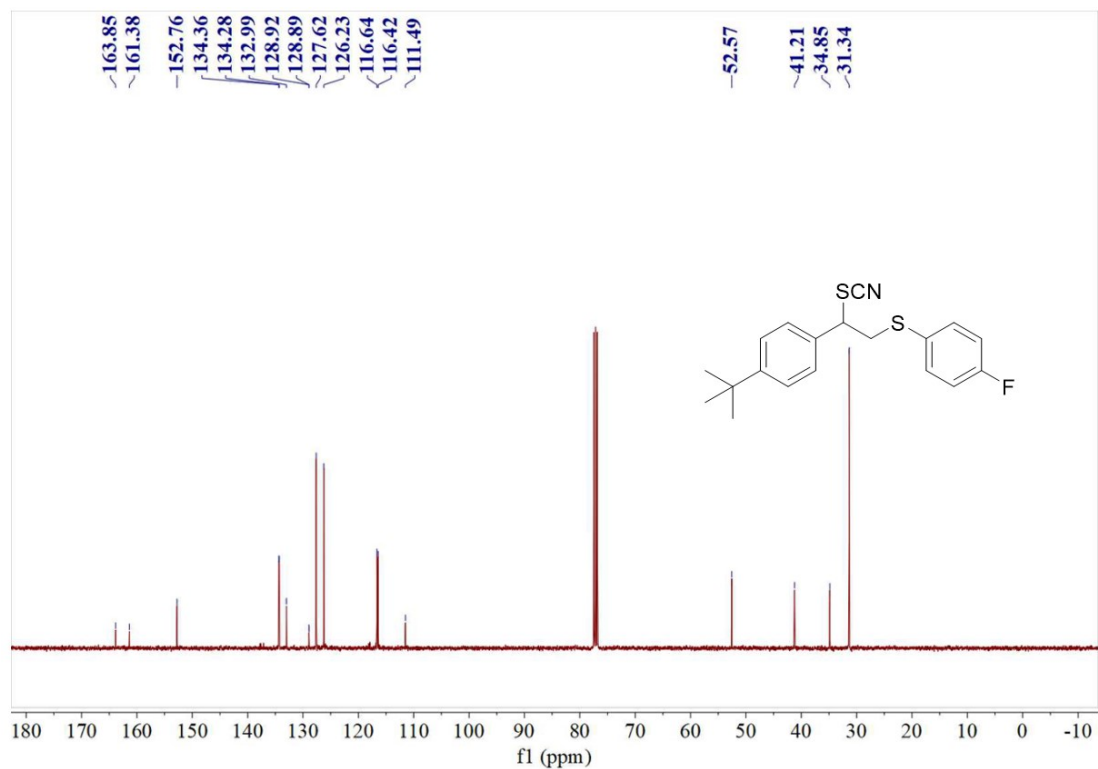

<sup>13</sup>C NMR (100 MHz, CDCl<sub>3</sub>) spectrum of 4a

(2-(4-(chloromethyl)phenyl)-2-thiocyanatoethyl)(4-fluorophenyl)sulfane (4ia)

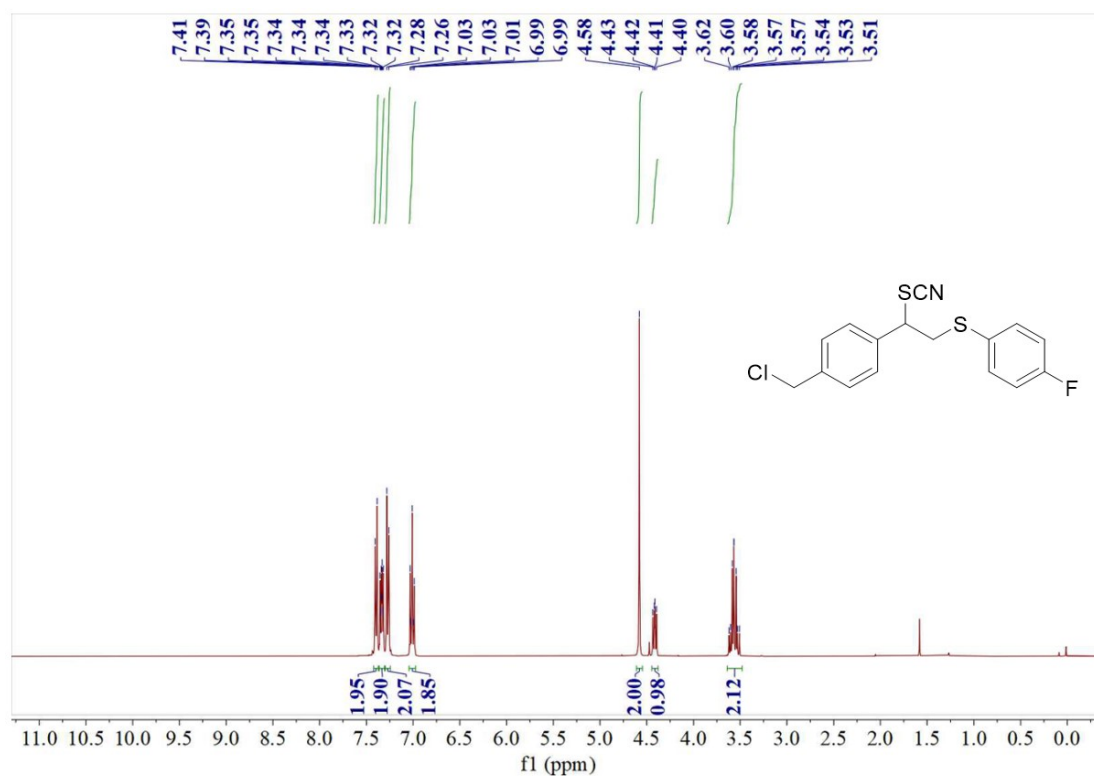

<sup>1</sup>H NMR (400 MHz, CDCl<sub>3</sub>) spectrum of 4ia

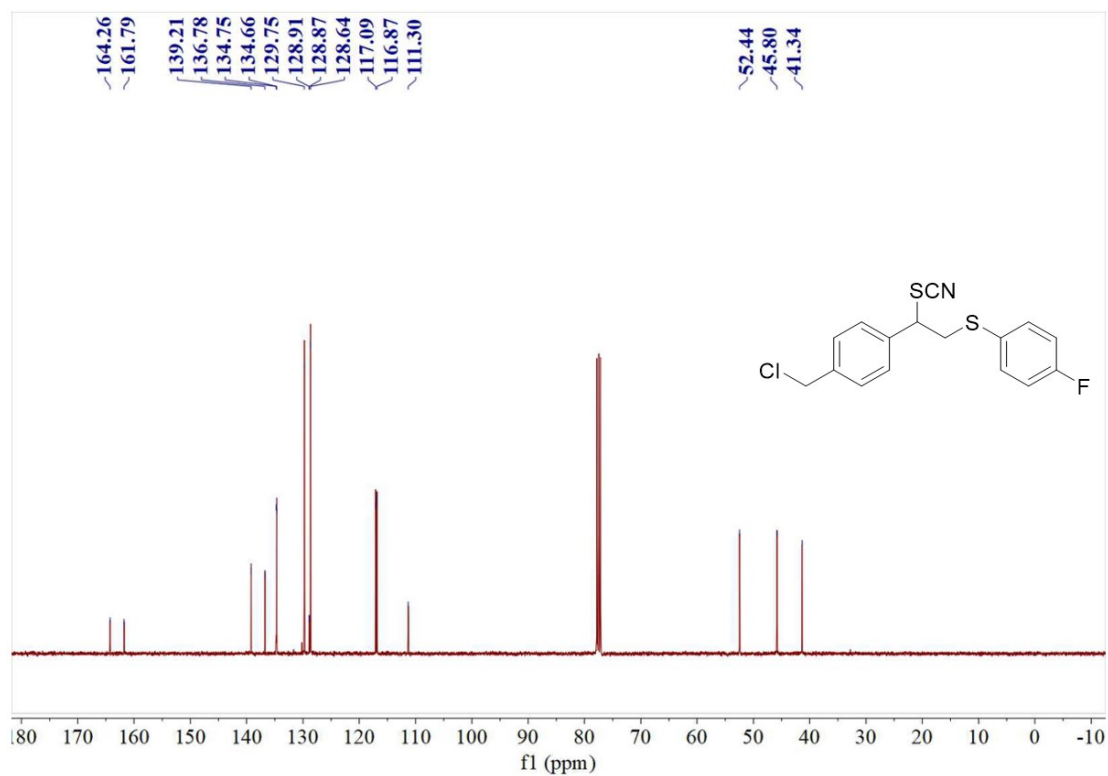

<sup>13</sup>C NMR (100 MHz, CDCl<sub>3</sub>) spectrum of 4ia

(4-fluorophenyl)(2-thiocyanato-2-(4-(trifluoromethyl)phenyl)ethyl)sulfane (4ja)

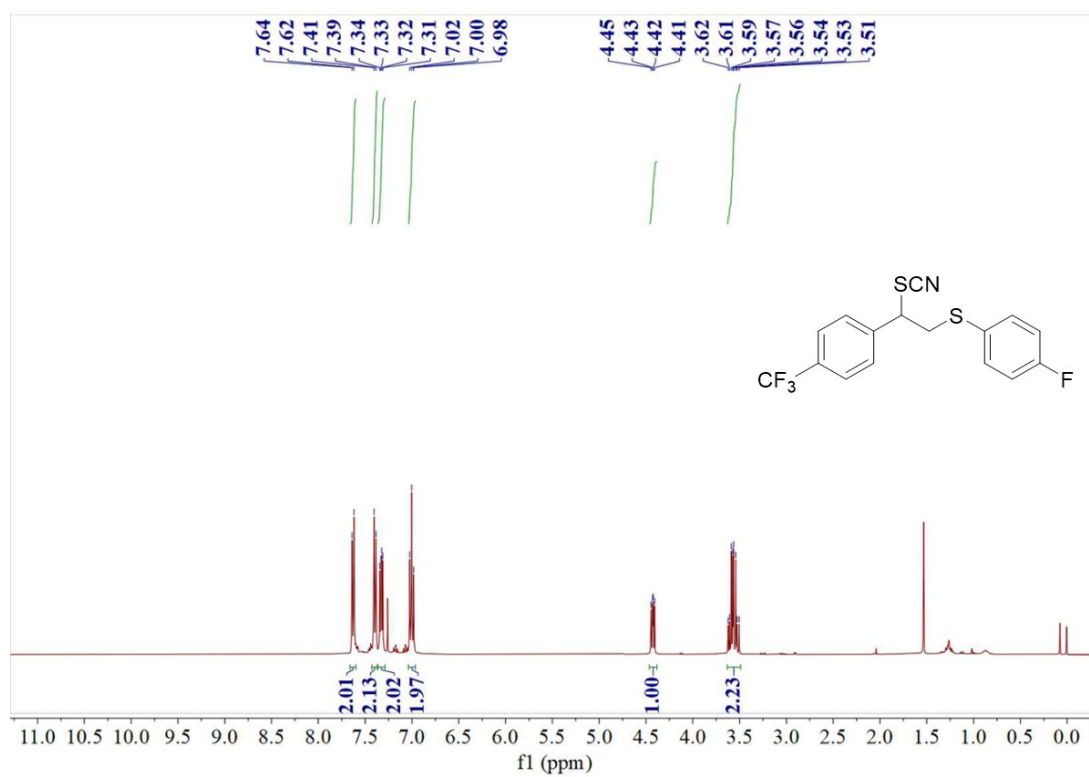

<sup>1</sup>H NMR (400 MHz, CDCl<sub>3</sub>) spectrum of 4ja

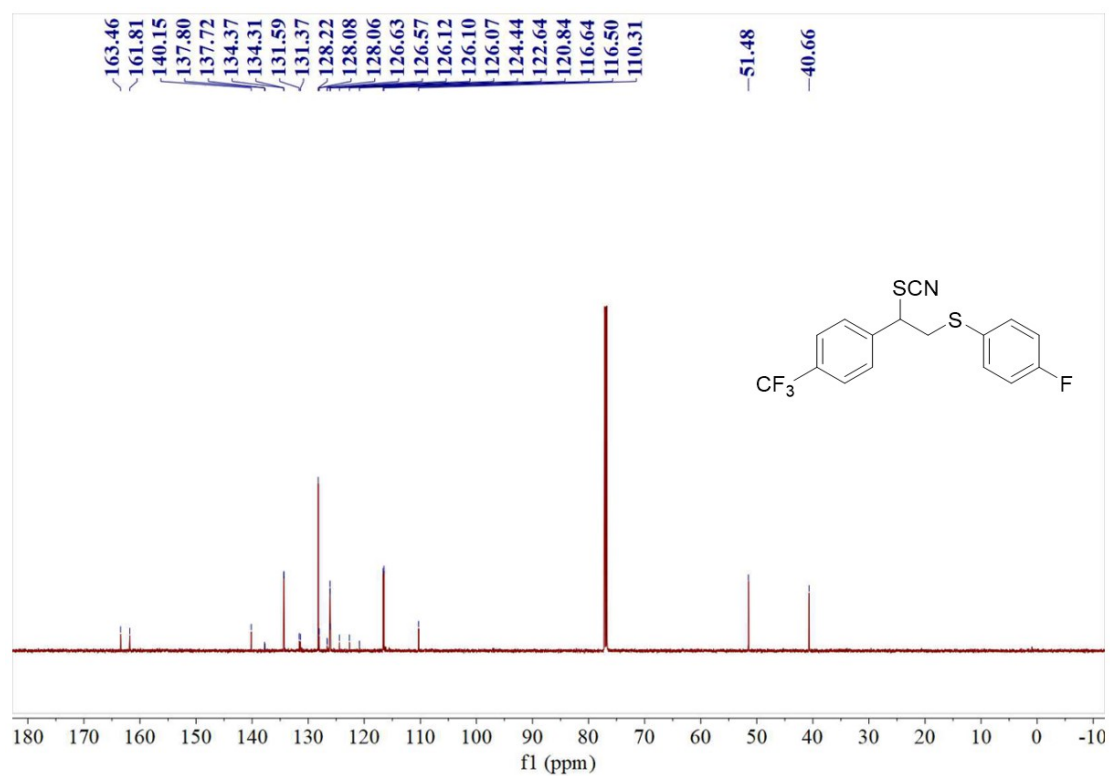

<sup>13</sup>C NMR (100 MHz, CDCl<sub>3</sub>) spectrum of 4ja

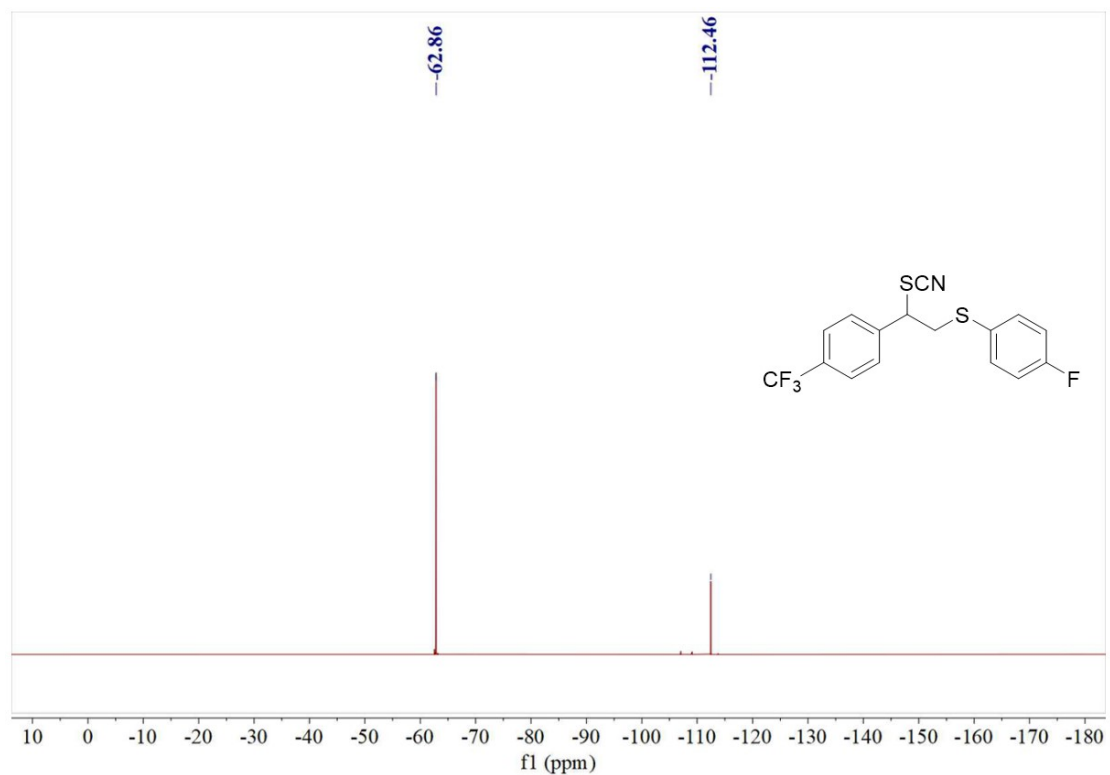

<sup>19</sup>F NMR (375 MHz, CDCl<sub>3</sub>) spectrum of 4ja



**(2-((4-fluorophenyl)thio)-1-thiocyanatoethyl)phenyl acetate (4ka)**

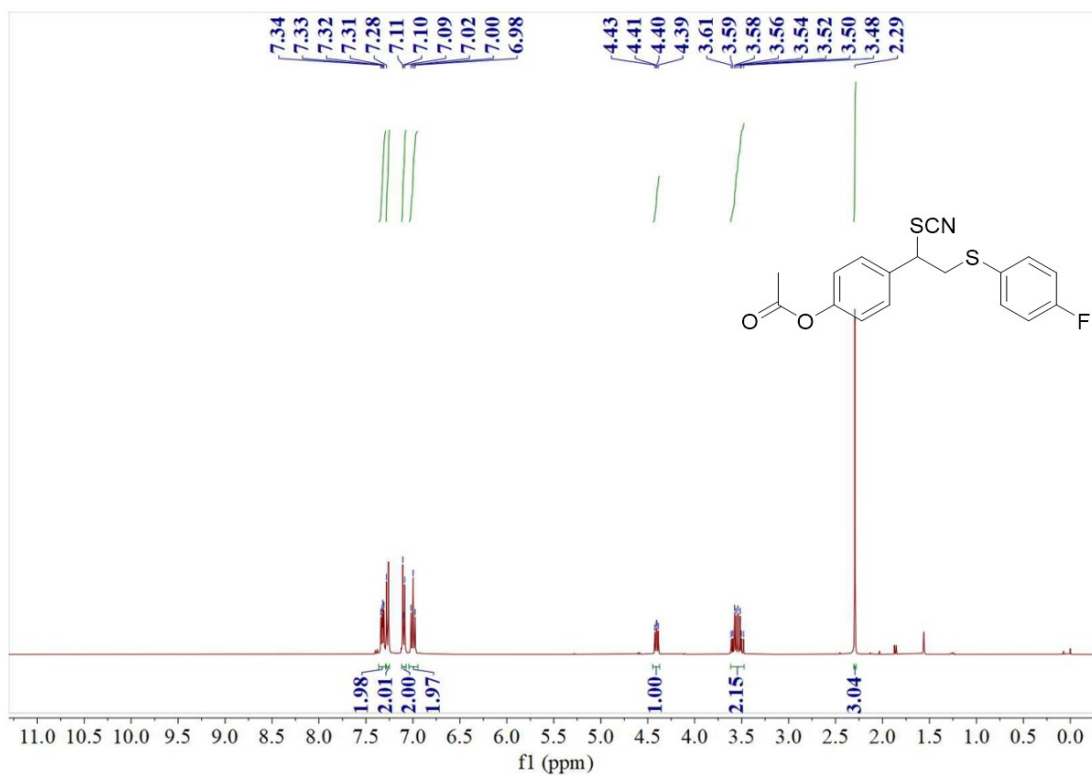

**<sup>1</sup>H NMR (400 MHz, CDCl<sub>3</sub>) spectrum of 4ka**

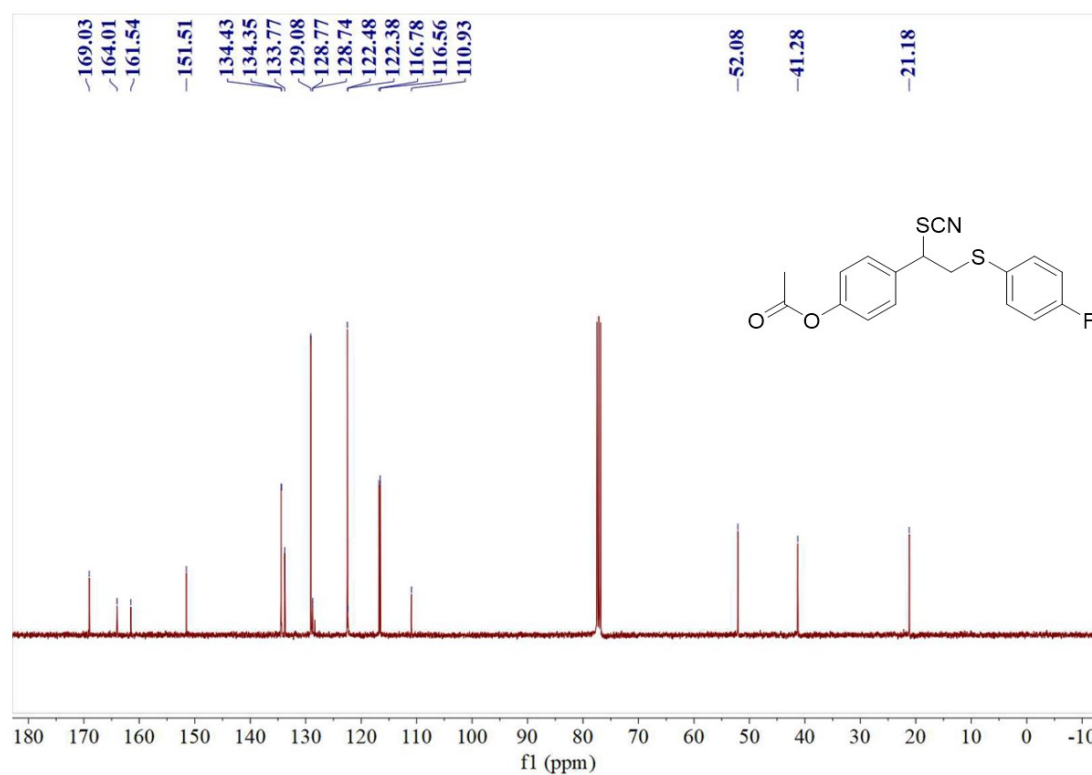

**<sup>13</sup>C NMR (100 MHz, CDCl<sub>3</sub>) spectrum of 4ka**

**(4-fluorophenyl)(2-(naphthalen-2-yl)-2-thiocyanatoethyl)sulfane (4la)**

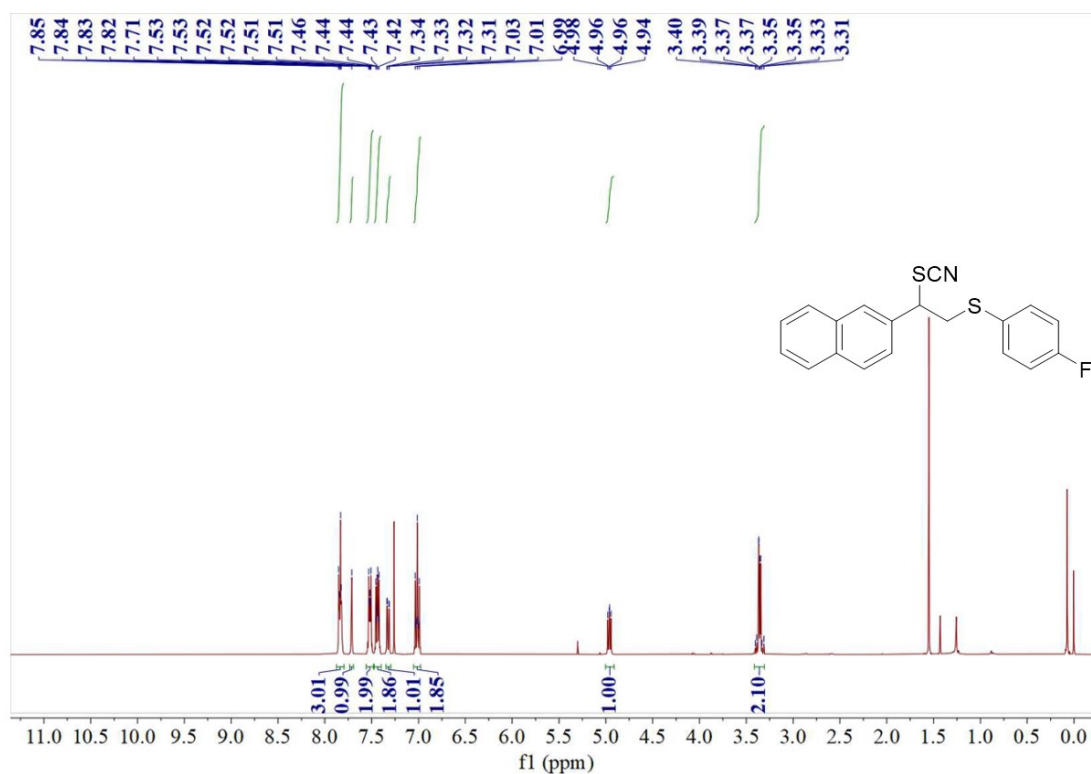

<sup>1</sup>H NMR (400 MHz, CDCl<sub>3</sub>) spectrum of 4a

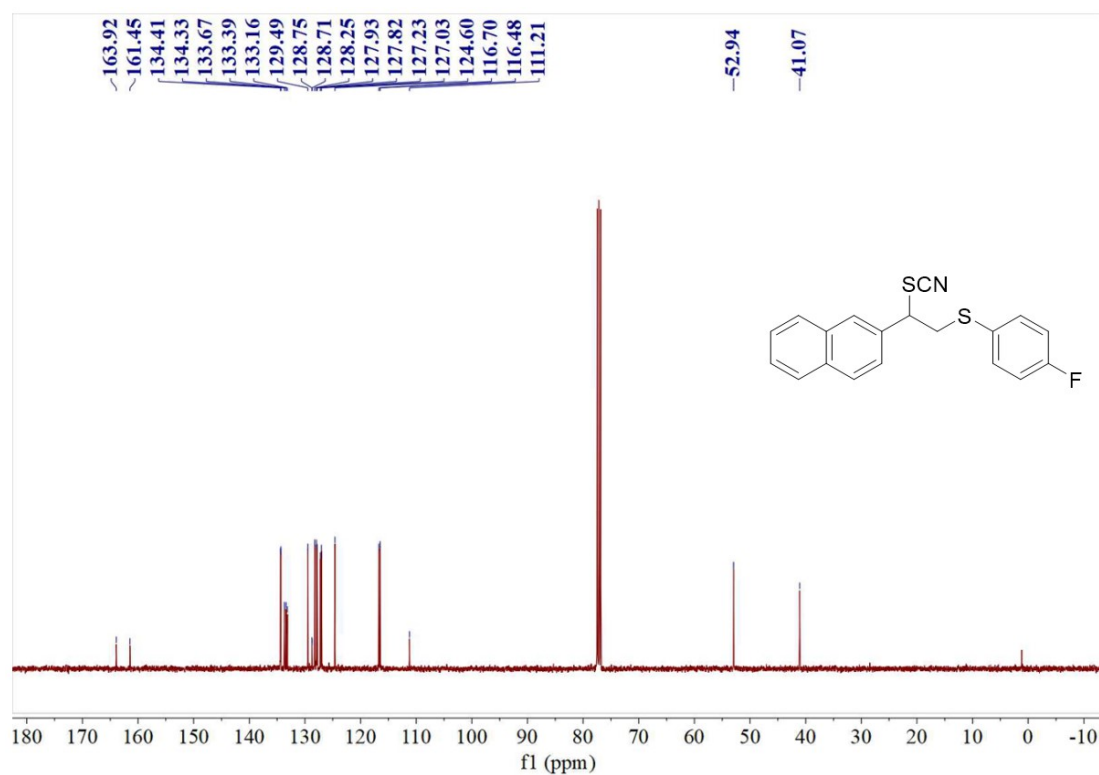

<sup>13</sup>C NMR (100 MHz, CDCl<sub>3</sub>) spectrum of 4a

(4-fluorophenyl)(2-(naphthalen-1-yl)-2-thiocyanatoethyl)sulfane (4a)

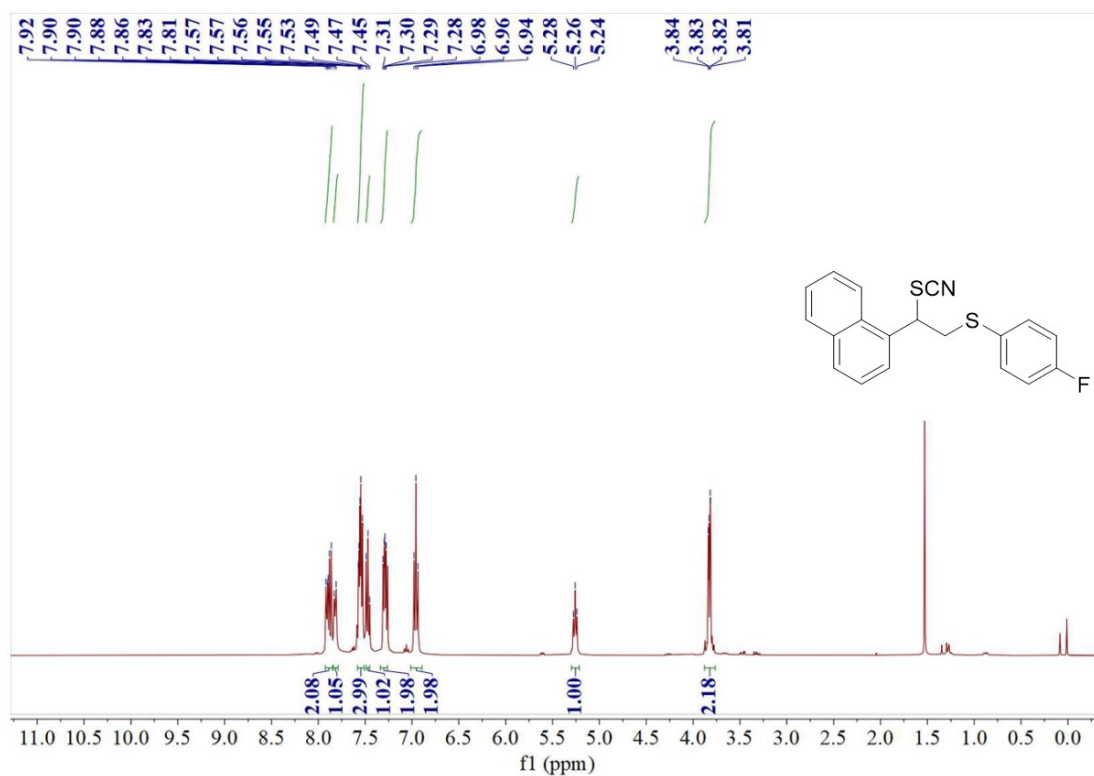

**<sup>1</sup>H NMR (400 MHz, CDCl<sub>3</sub>) spectrum of 4ma**

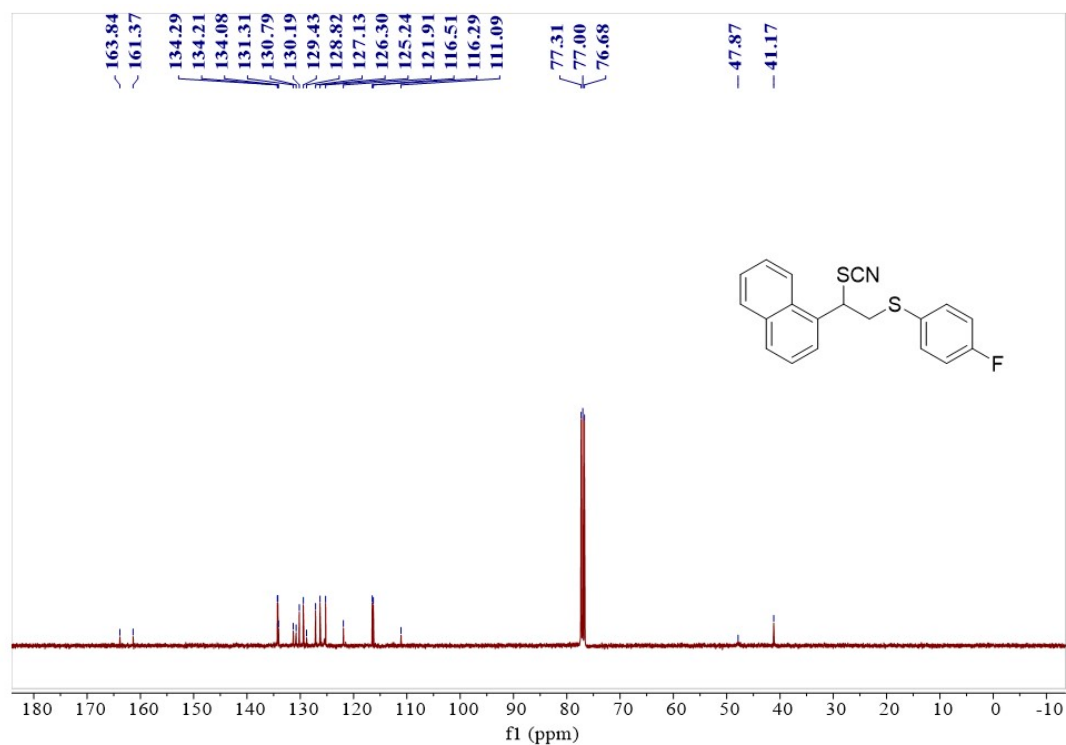

**<sup>13</sup>C NMR (100 MHz, CDCl<sub>3</sub>) spectrum of 4ma**

**(4-fluorophenyl)(1-thiocyanato-2,3-dihydro-1H-inden-2-yl)sulfane (4na)**

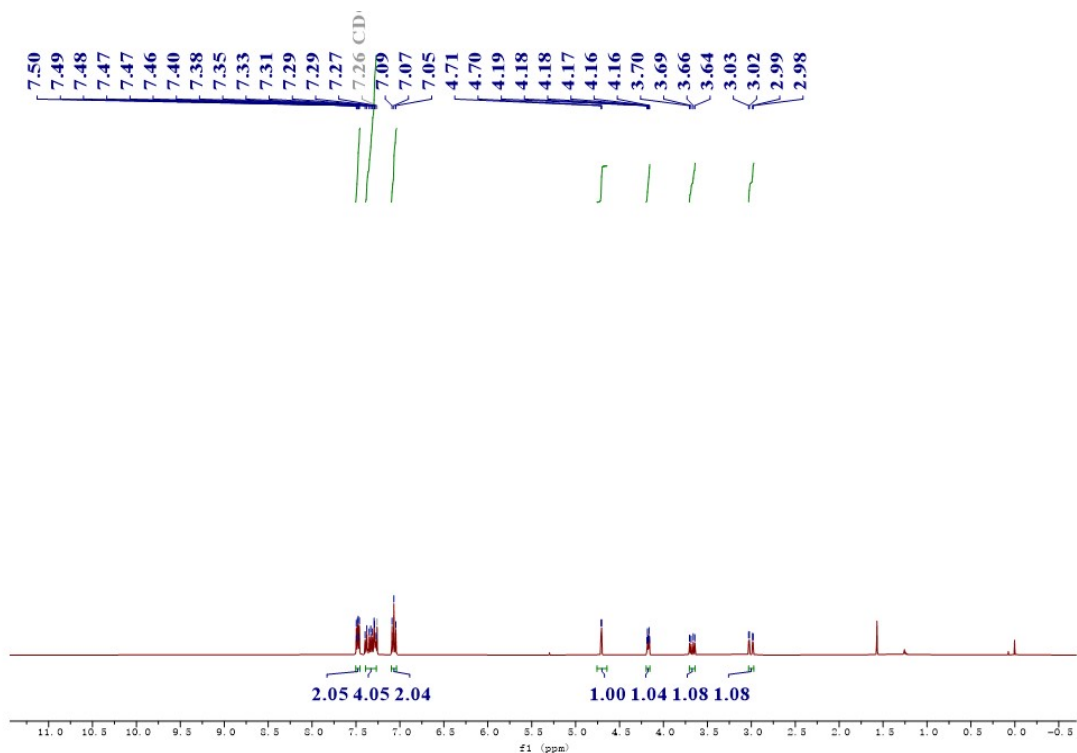

**<sup>1</sup>H NMR (400 MHz, CDCl<sub>3</sub>) spectrum of 4na**

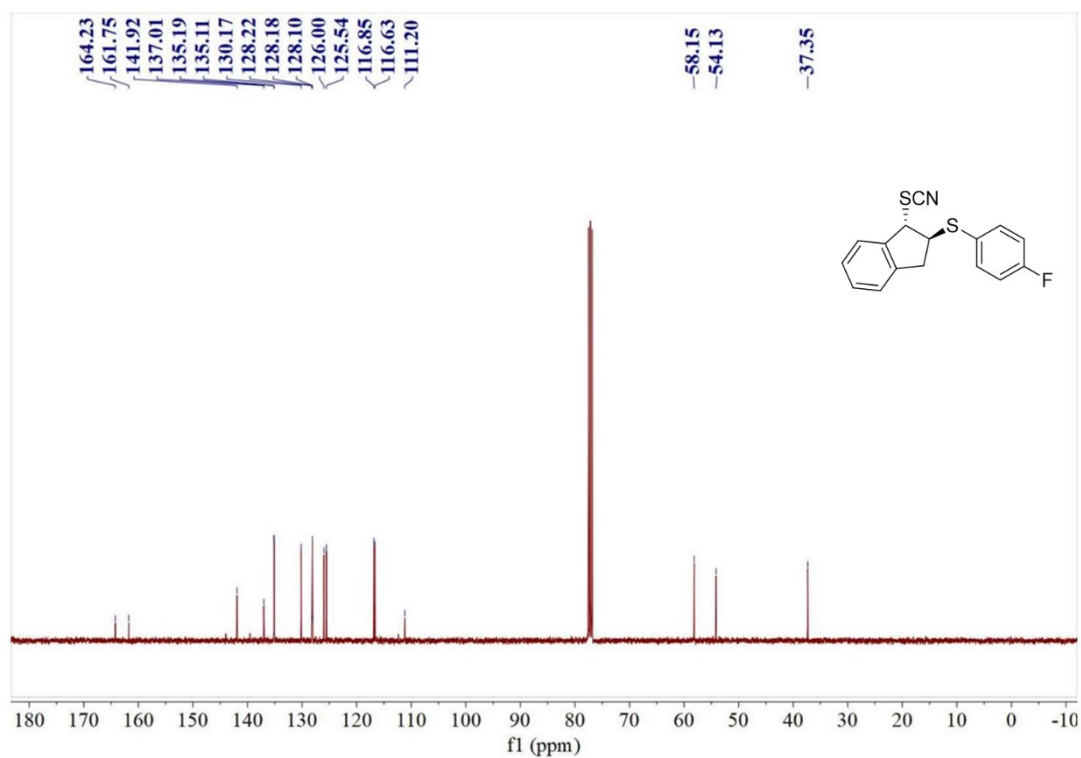

**<sup>13</sup>C NMR (100 MHz, CDCl<sub>3</sub>) spectrum of 4na**

**(4-fluorophenyl)(3-phenyl-2-thiocyanatopropyl)sulfane (40a)**

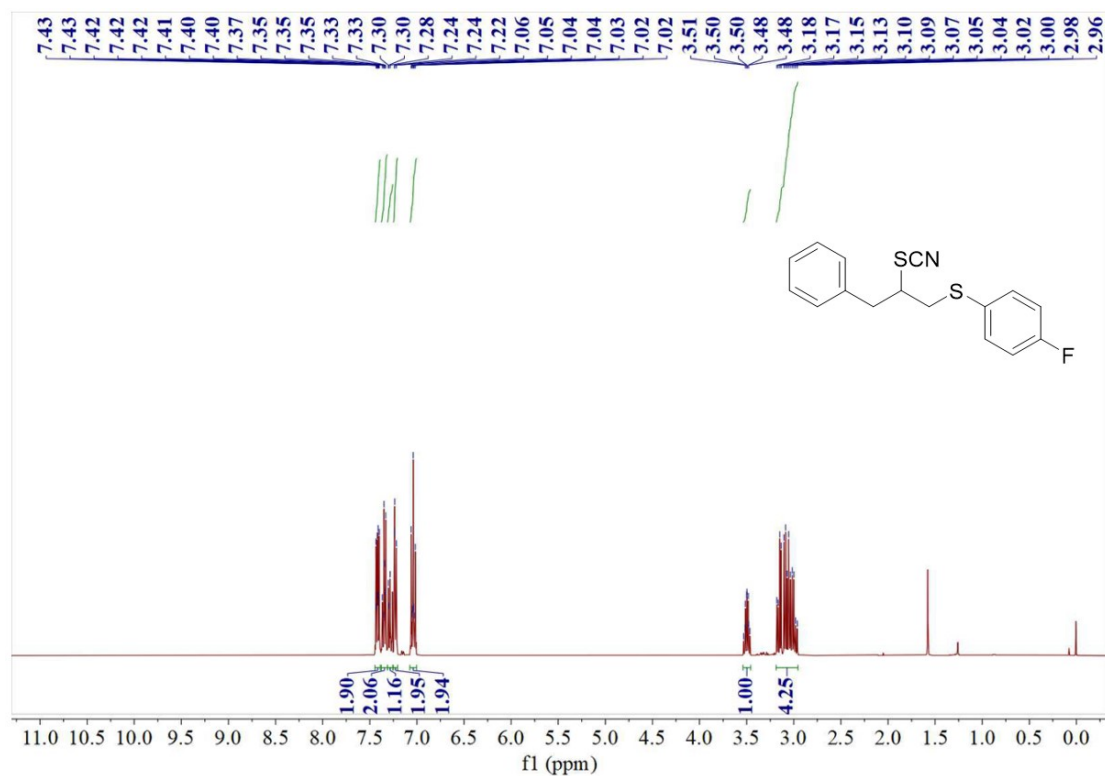

**<sup>1</sup>H NMR (400 MHz, CDCl<sub>3</sub>) spectrum of 40a**

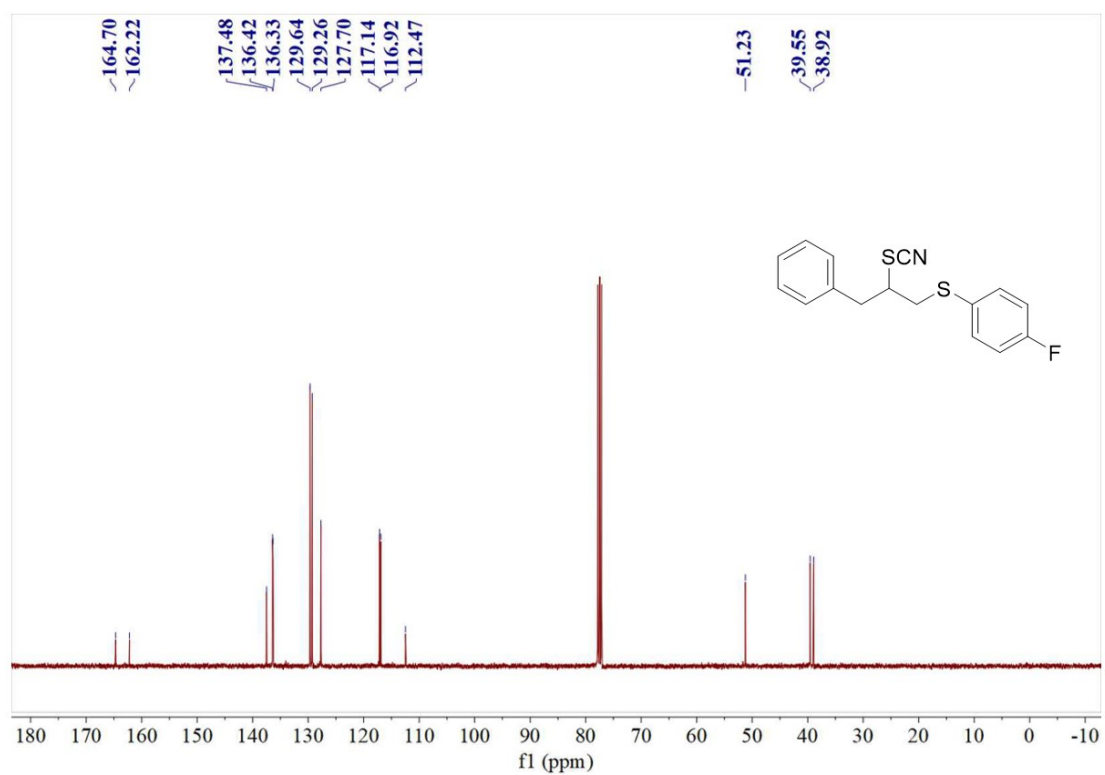

**<sup>13</sup>C NMR (100 MHz, CDCl<sub>3</sub>) spectrum of 40a**

**(2-cyclohexyl-2-thiocyanatoethyl)(4-fluorophenyl)sulfane (4pa)**

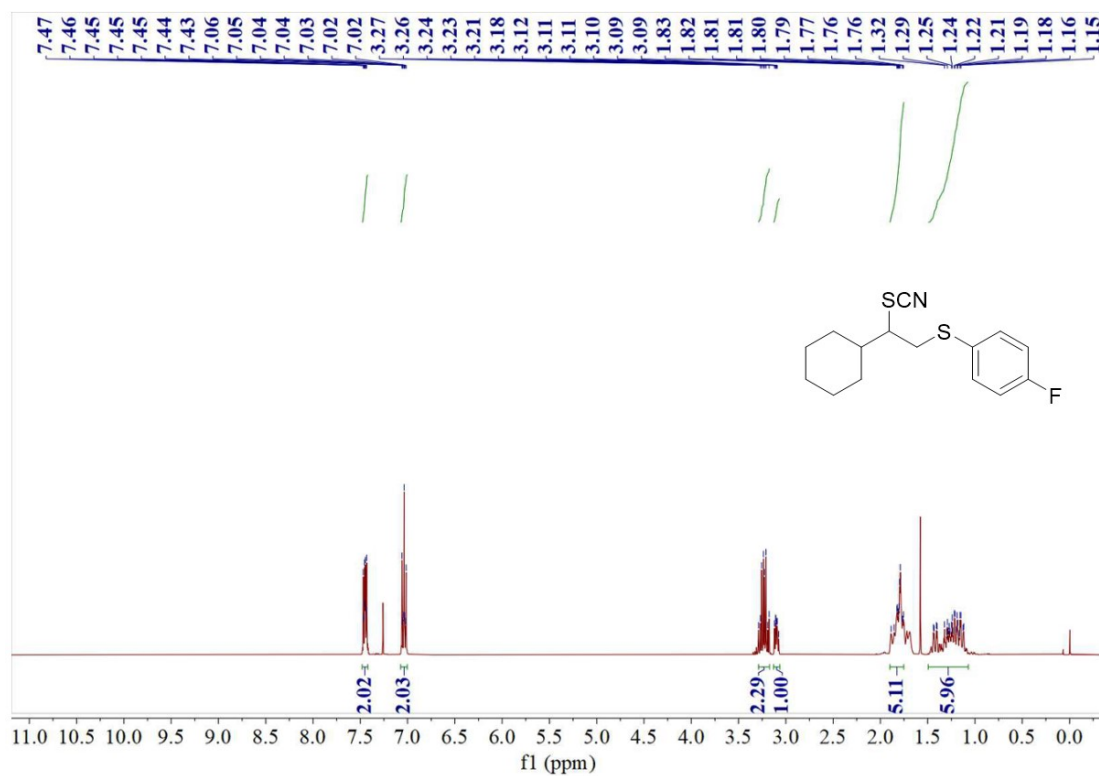

<sup>1</sup>H NMR (400 MHz, CDCl<sub>3</sub>) spectrum of 4pa

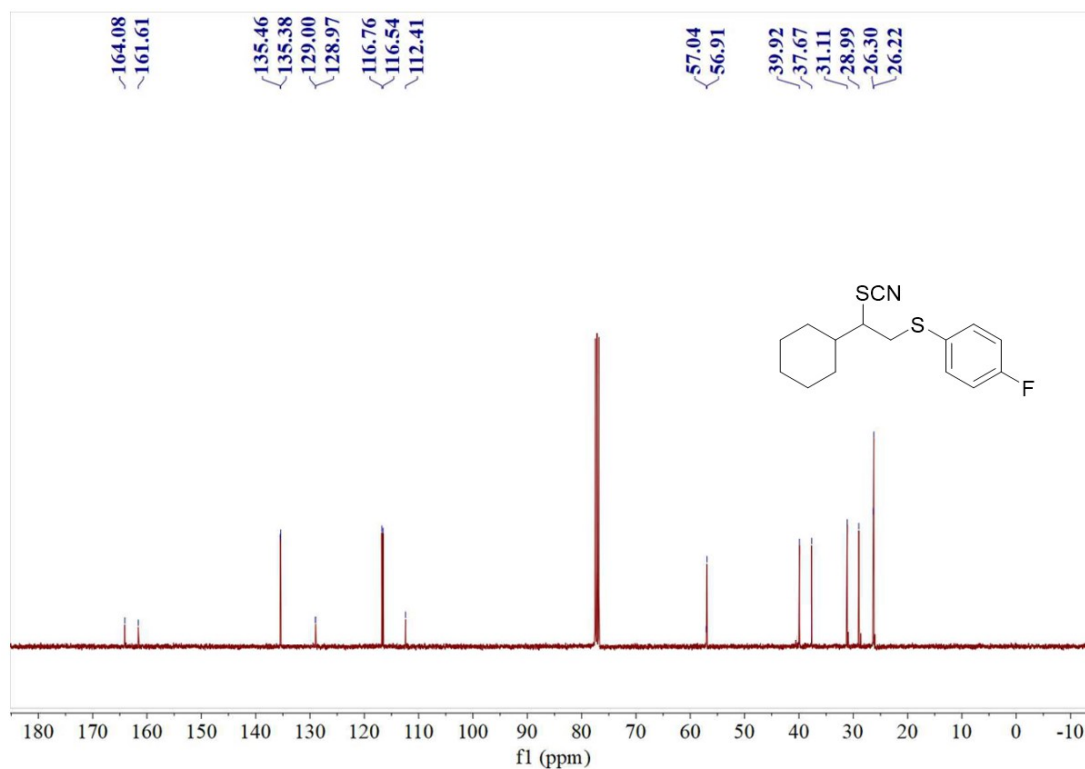

<sup>13</sup>C NMR (100 MHz, CDCl<sub>3</sub>) spectrum of 4pa

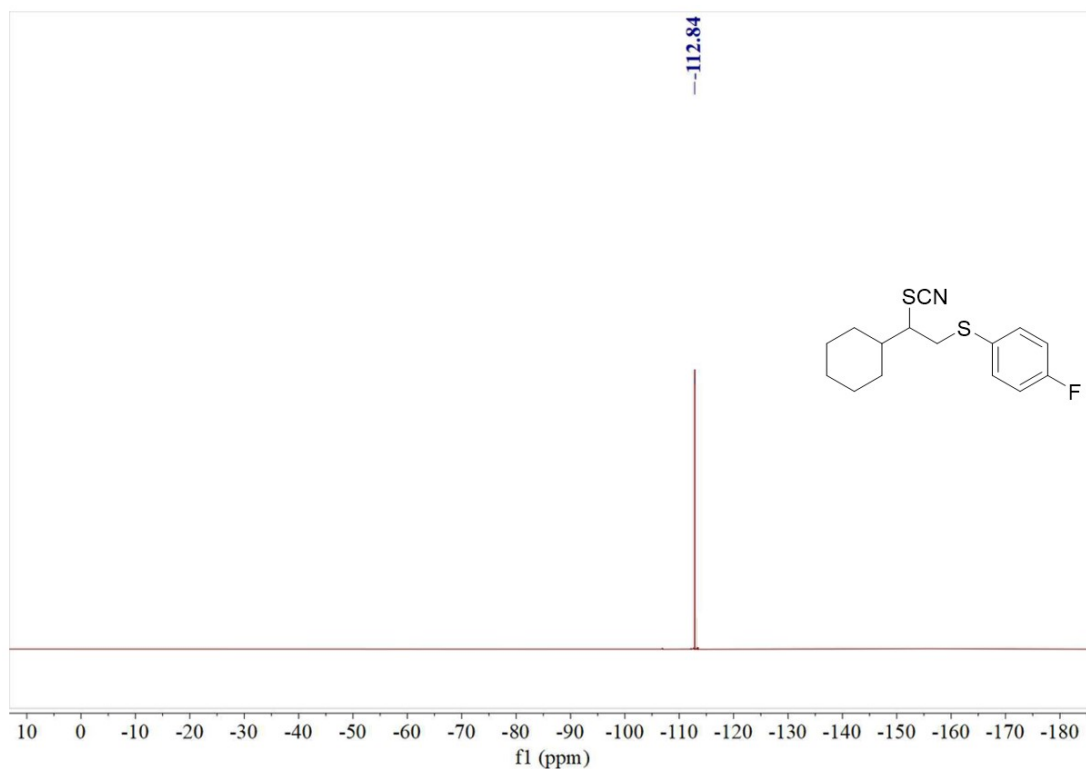

<sup>19</sup>F NMR (375 MHz, CDCl<sub>3</sub>) spectrum of 4pa

(4-fluorophenyl)(2-thiocyanatocyclopentyl)sulfane (4qa)

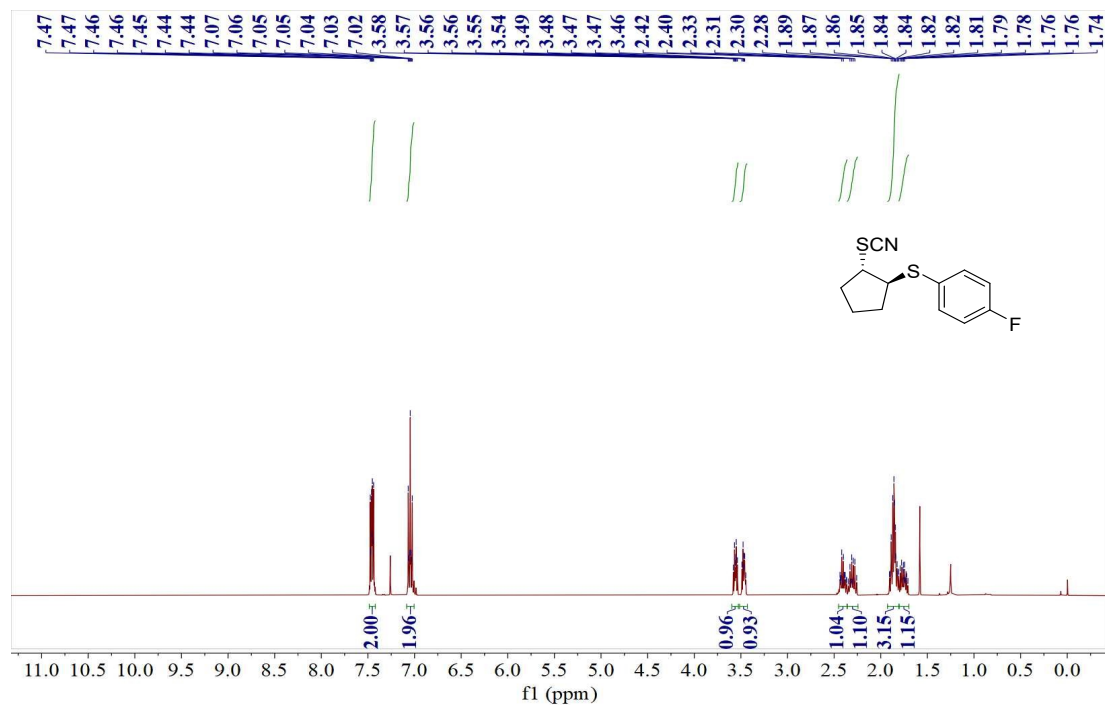

<sup>1</sup>H NMR (400 MHz, CDCl<sub>3</sub>) spectrum of 4qa

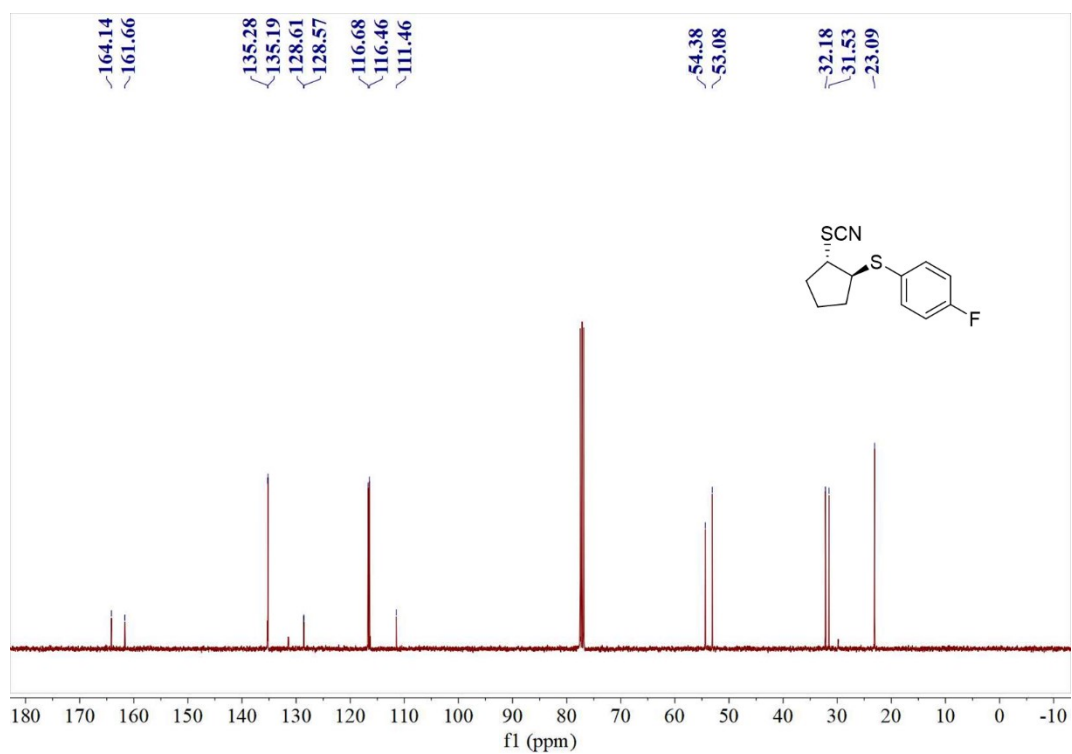

<sup>13</sup>C NMR (100 MHz, CDCl<sub>3</sub>) spectrum of 4qa

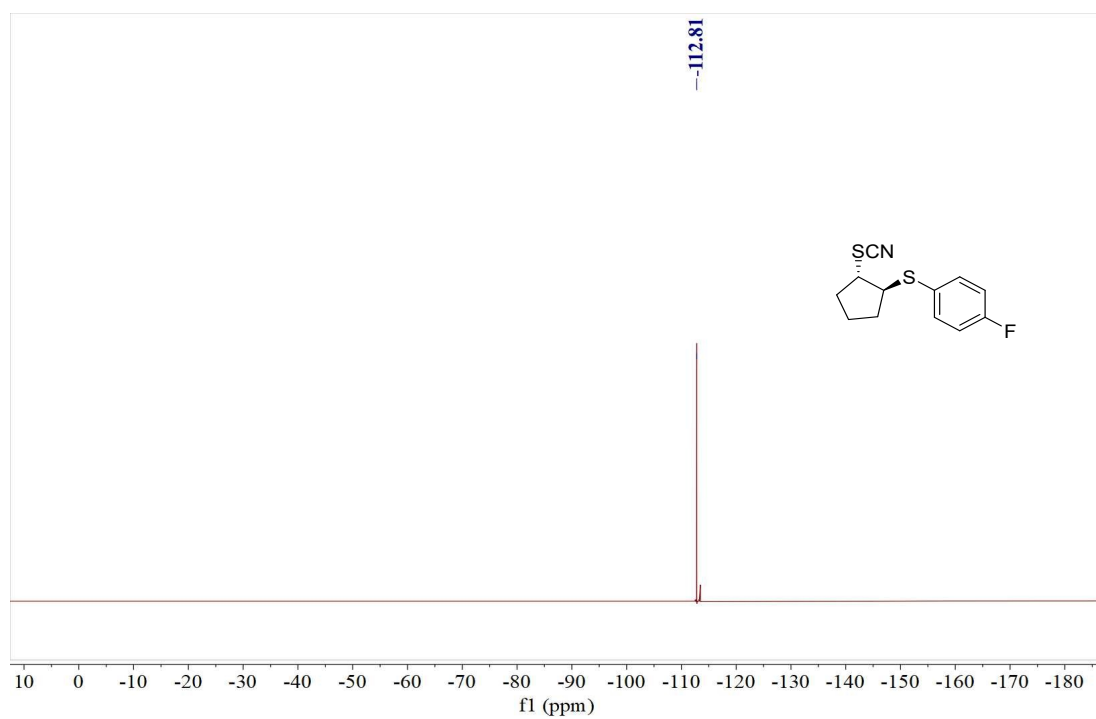

<sup>19</sup>F NMR (375 MHz, CDCl<sub>3</sub>) spectrum of 4qa



**(4-fluorophenyl)(2-thiocyanatocyclohexyl)sulfane (4ra)**

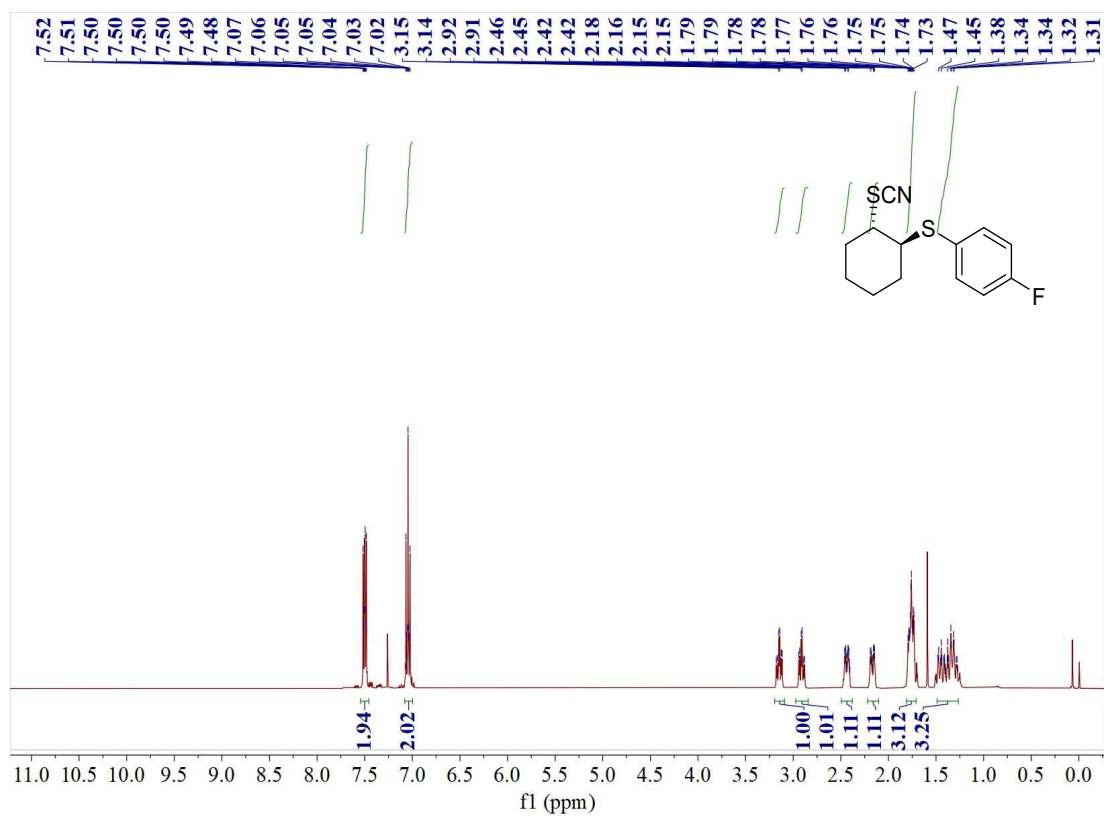

<sup>1</sup>H NMR (400 MHz, CDCl<sub>3</sub>) spectrum of 4ra

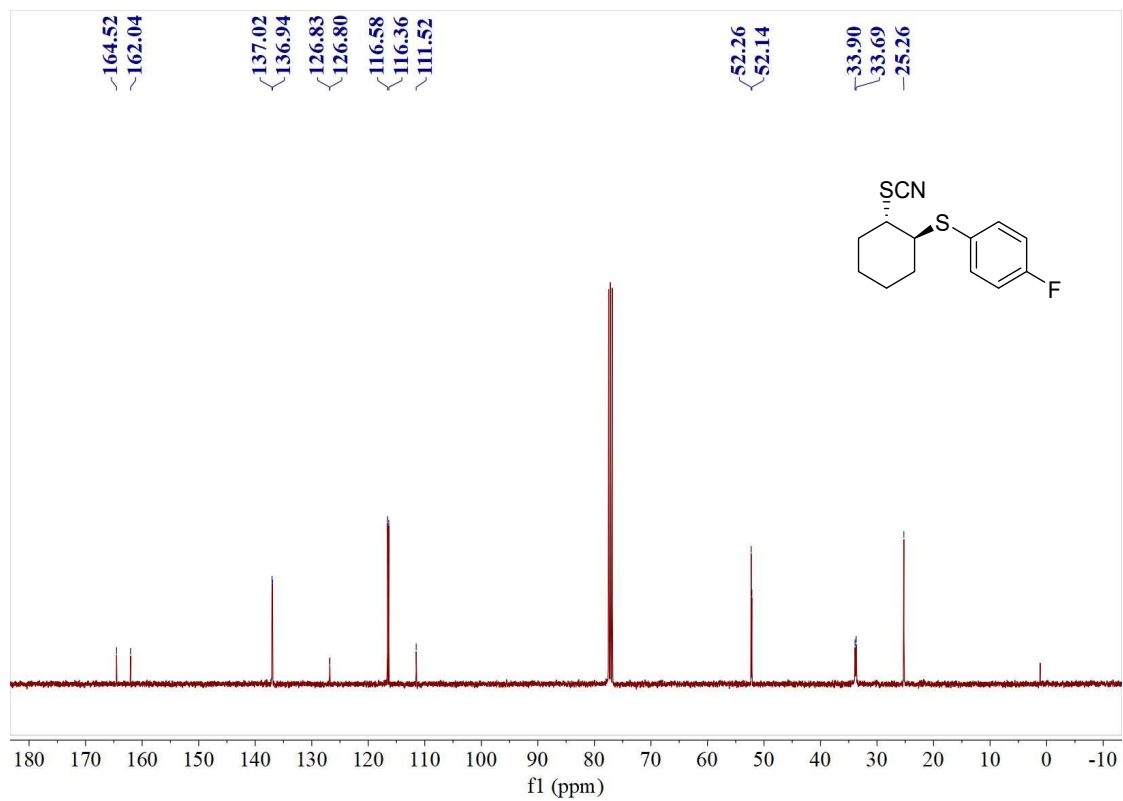

<sup>13</sup>C NMR (100 MHz, CDCl<sub>3</sub>) spectrum of 4ra

**(4-fluorophenyl)(2-isothiocyanato-2-phenylpropyl)sulfane (5)**

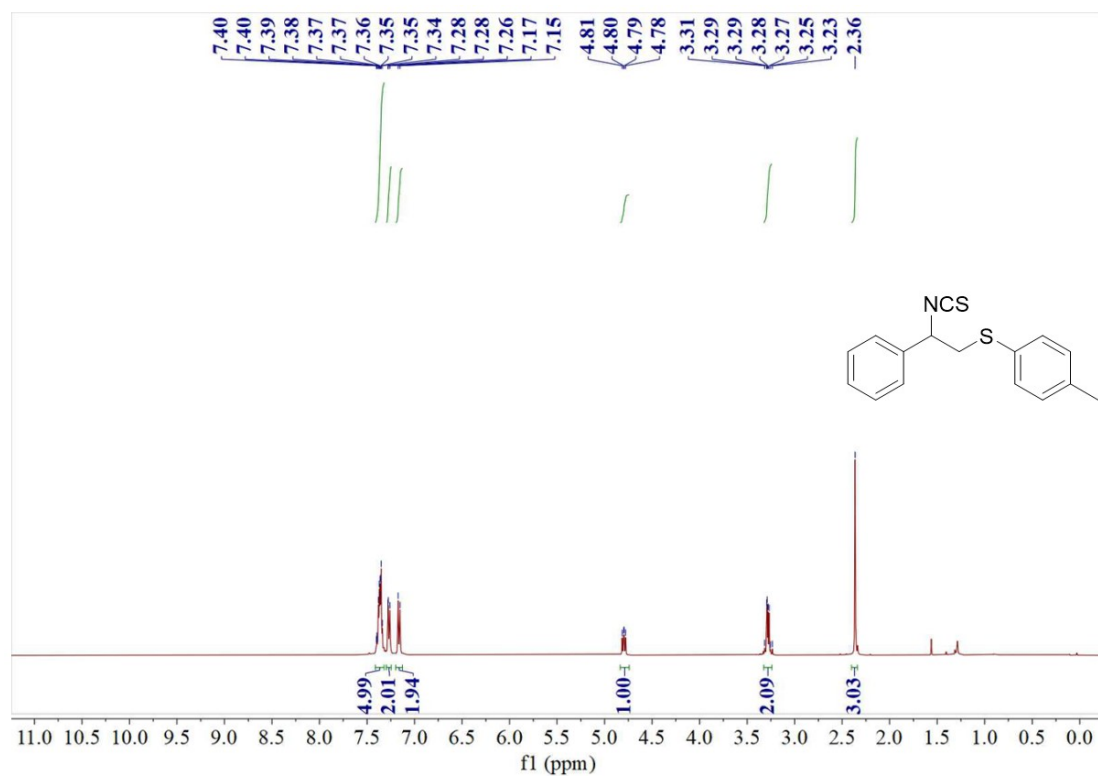

**<sup>1</sup>H NMR (400 MHz, CDCl<sub>3</sub>) spectrum of 5**

**(5-methoxyphenyl)(2-phenyl-2-thiocyanatoethyl)sulfane (6)**

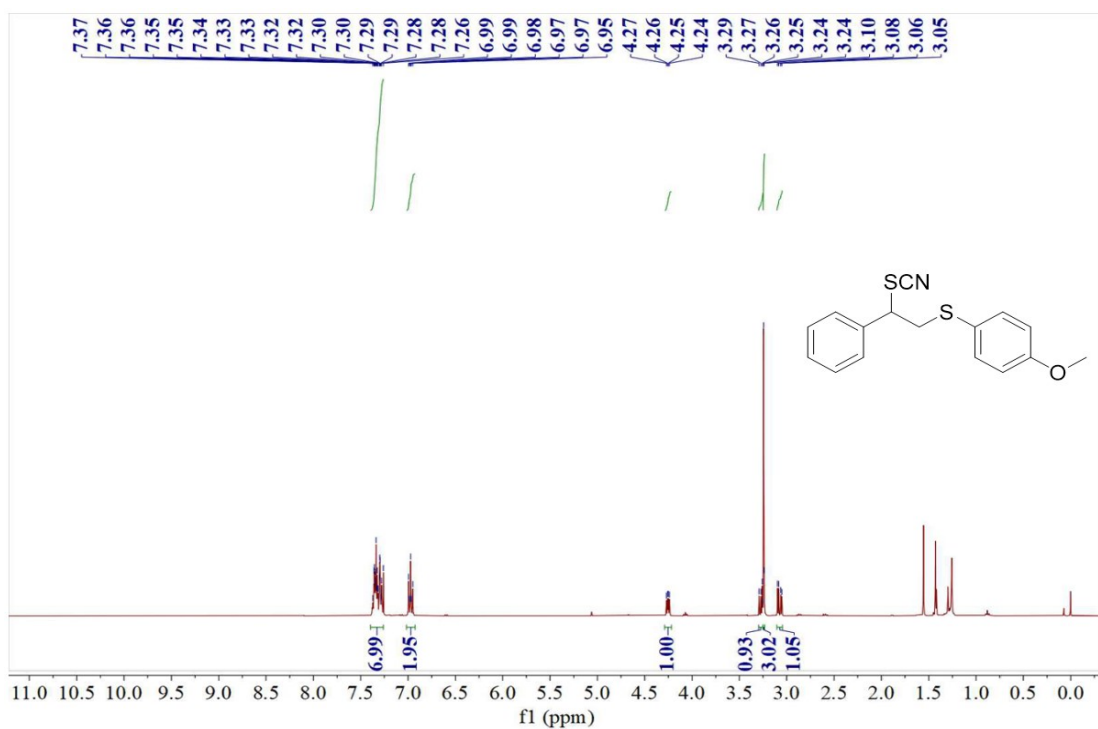

**<sup>1</sup>H NMR (400 MHz, CDCl<sub>3</sub>) spectrum of 6**

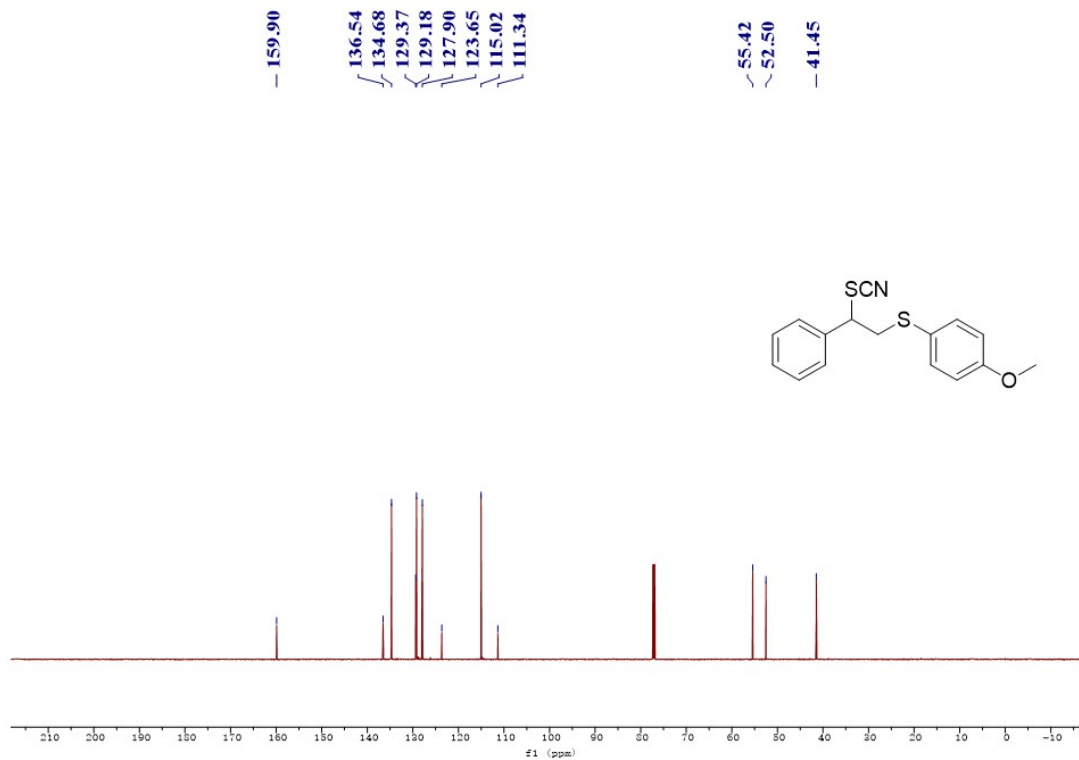

<sup>13</sup>C NMR (100 MHz, CDCl<sub>3</sub>) spectrum of 6  
(4-fluorophenyl)(2-phenyl-2-((trifluoromethyl)thio)ethyl)sulfane (7)

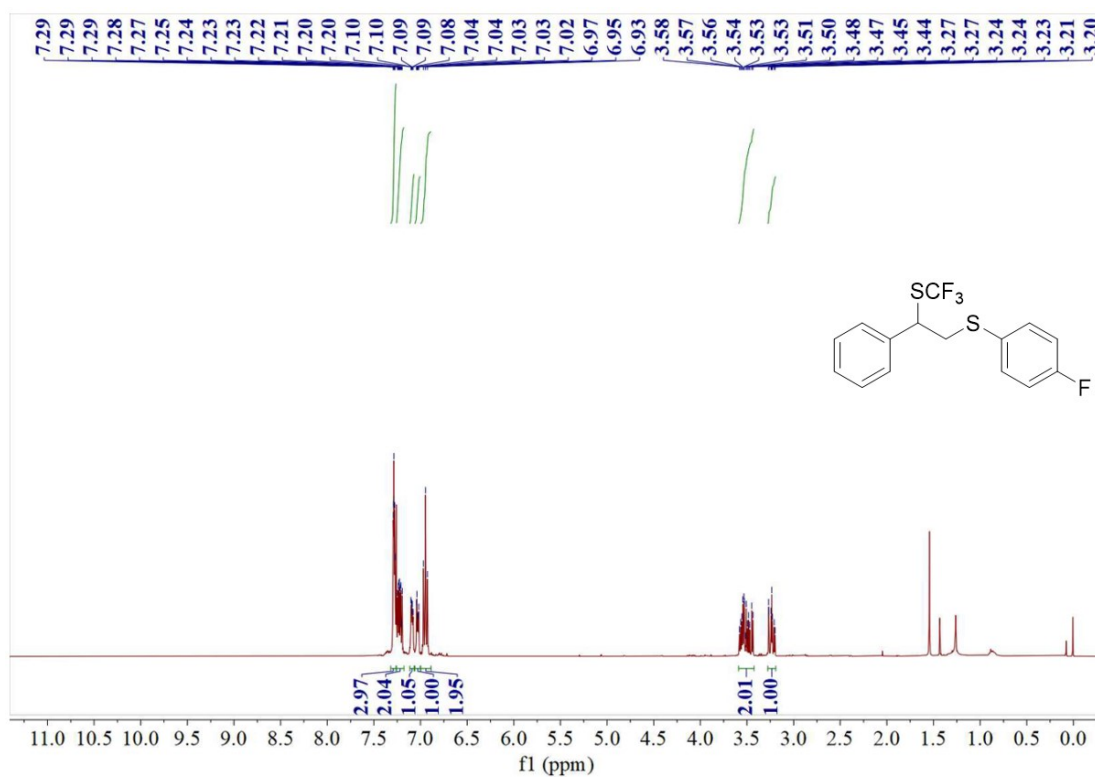

<sup>1</sup>H NMR (400 MHz, CDCl<sub>3</sub>) spectrum of 7

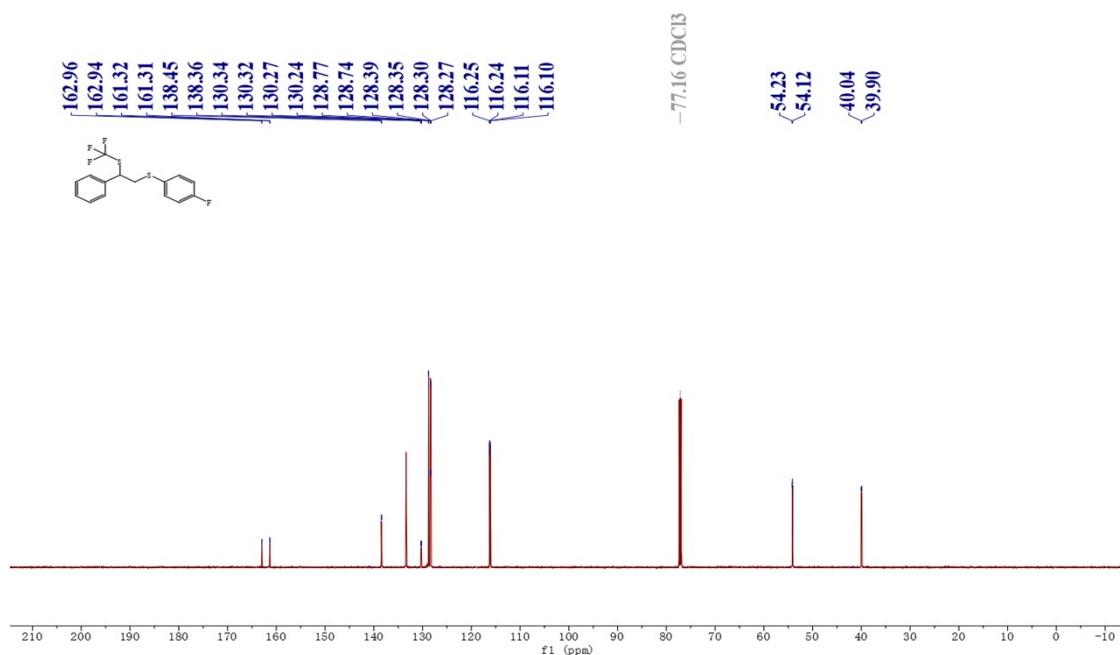

<sup>13</sup>C NMR (400 MHz, CDCl<sub>3</sub>) spectrum of 7

2-((4-fluorophenyl)thio)-1-phenylethan-1-ol (C)

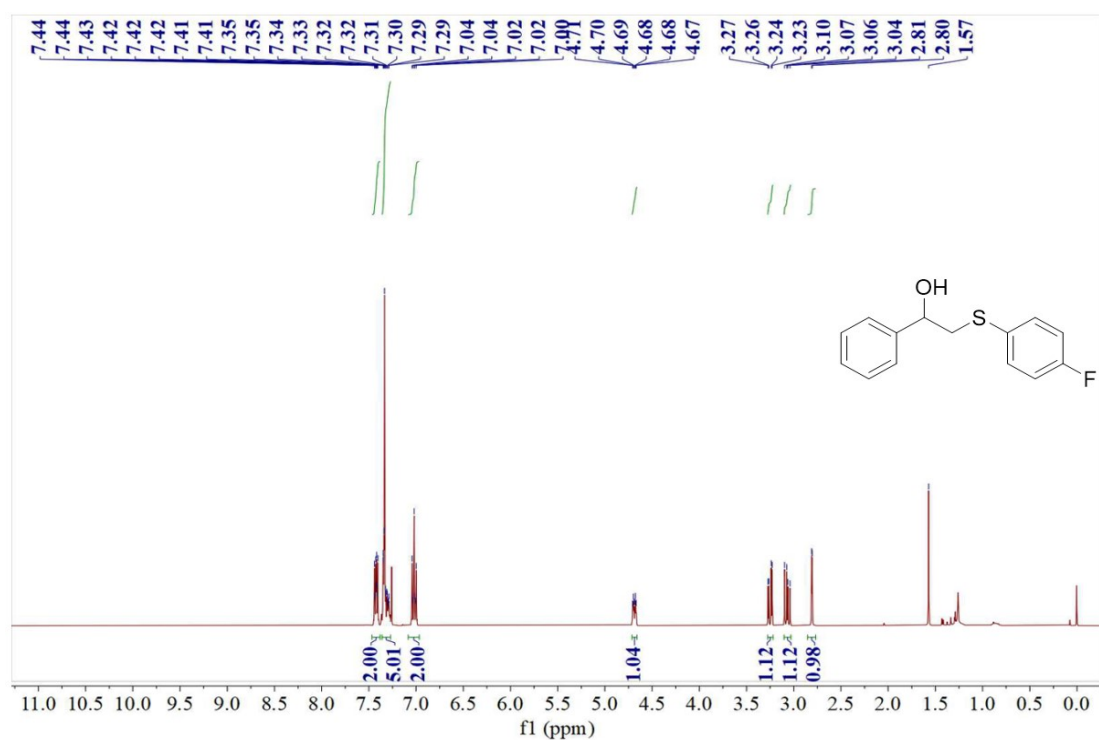

<sup>1</sup>H NMR (400 MHz, CDCl<sub>3</sub>) spectrum of C

**1-((4-fluorophenyl)thio)pyrrolidine-2,5-dione (F)**

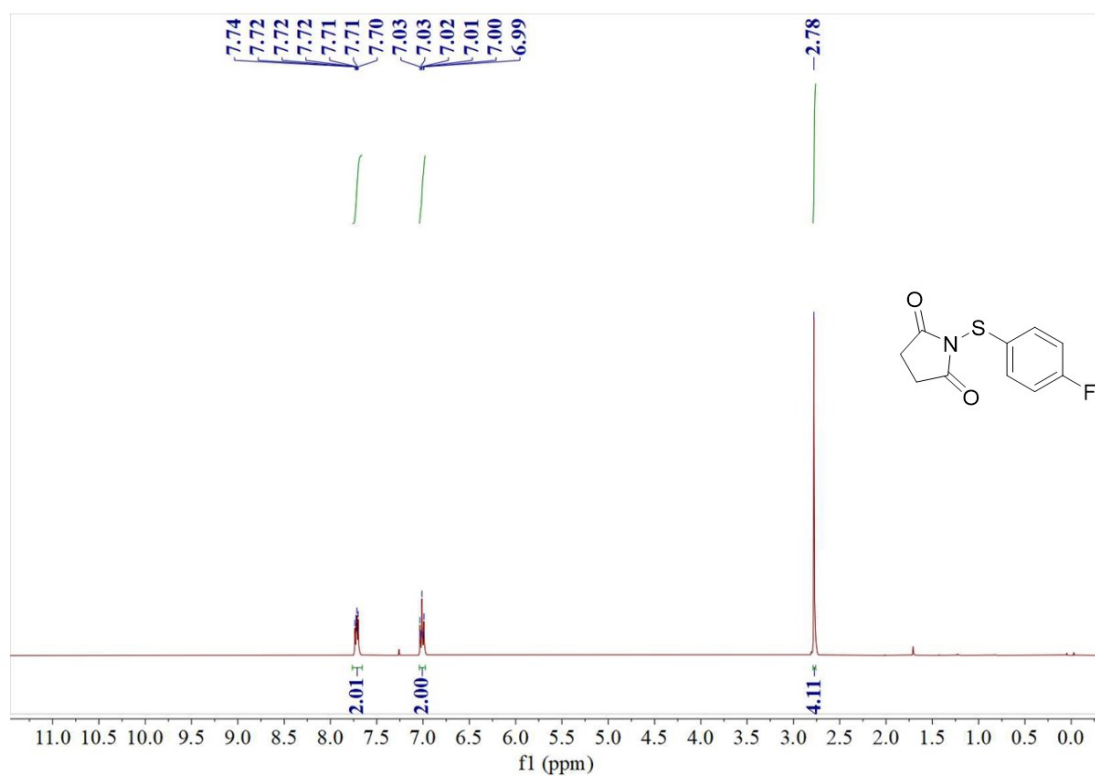

**<sup>1</sup>H NMR (400 MHz, CDCl<sub>3</sub>) spectrum of F**

**(1-bromo-2-thiocyanatoethyl)benzene (I)**

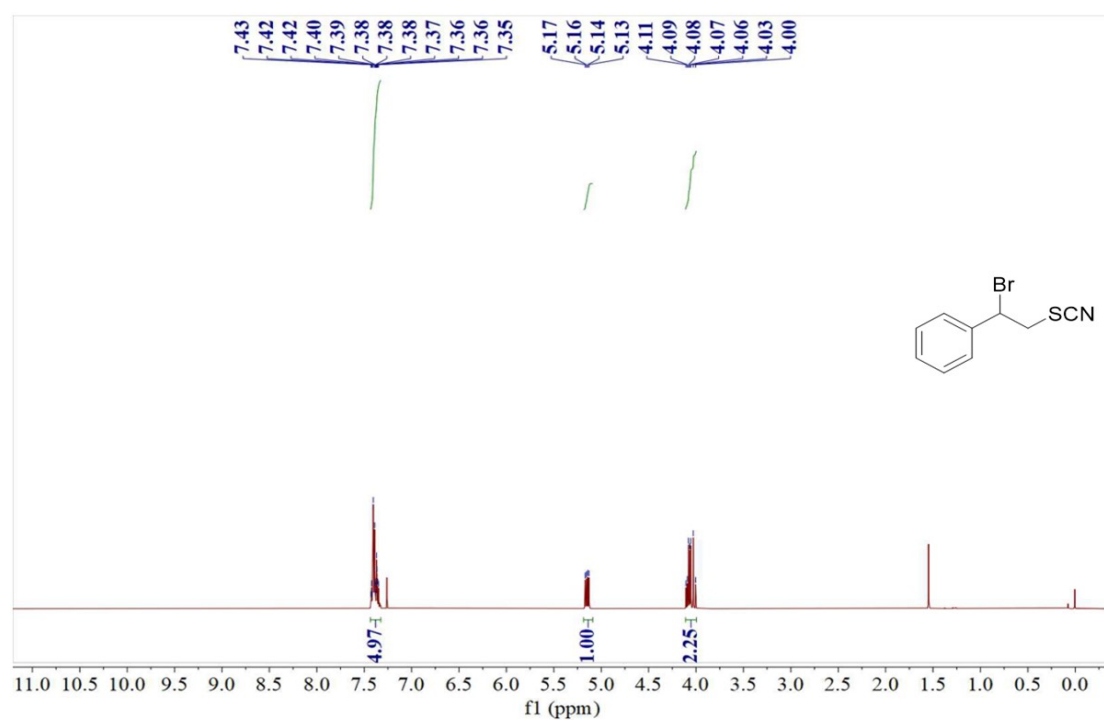

**<sup>1</sup>H NMR (400 MHz, CDCl<sub>3</sub>) spectrum of I**
